# Supplementary material for: Lanthanide-based entangled coordination polymers connected by thiophene-2,5-dicarboxylate: solvothermal syntheses, crystal structures, luminescence and magnetic properties
Source: Royal Society of Chemistry journal article supplement (doi:10.1039/c6ce00321d), 2016-01-01
Supplement: c6ce00321d1.pdf [file c6ce00321d1.pdf]

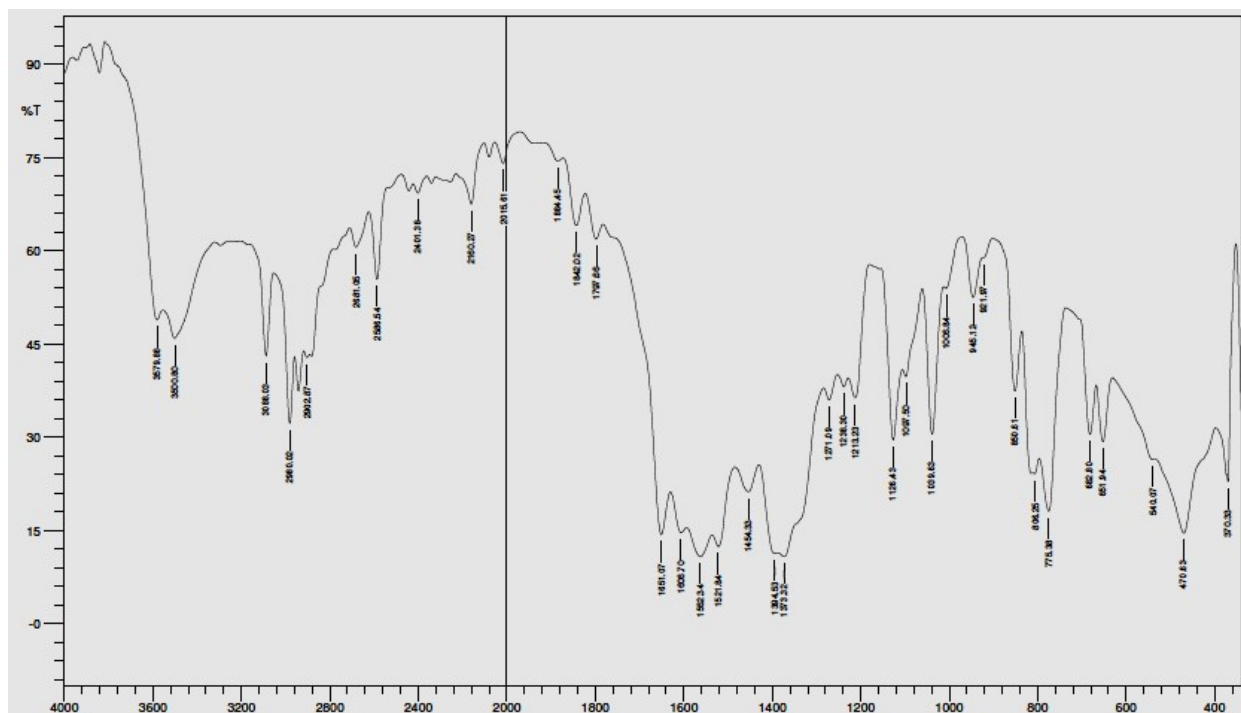

S1 (a) FT-IR spectrum of CP 1

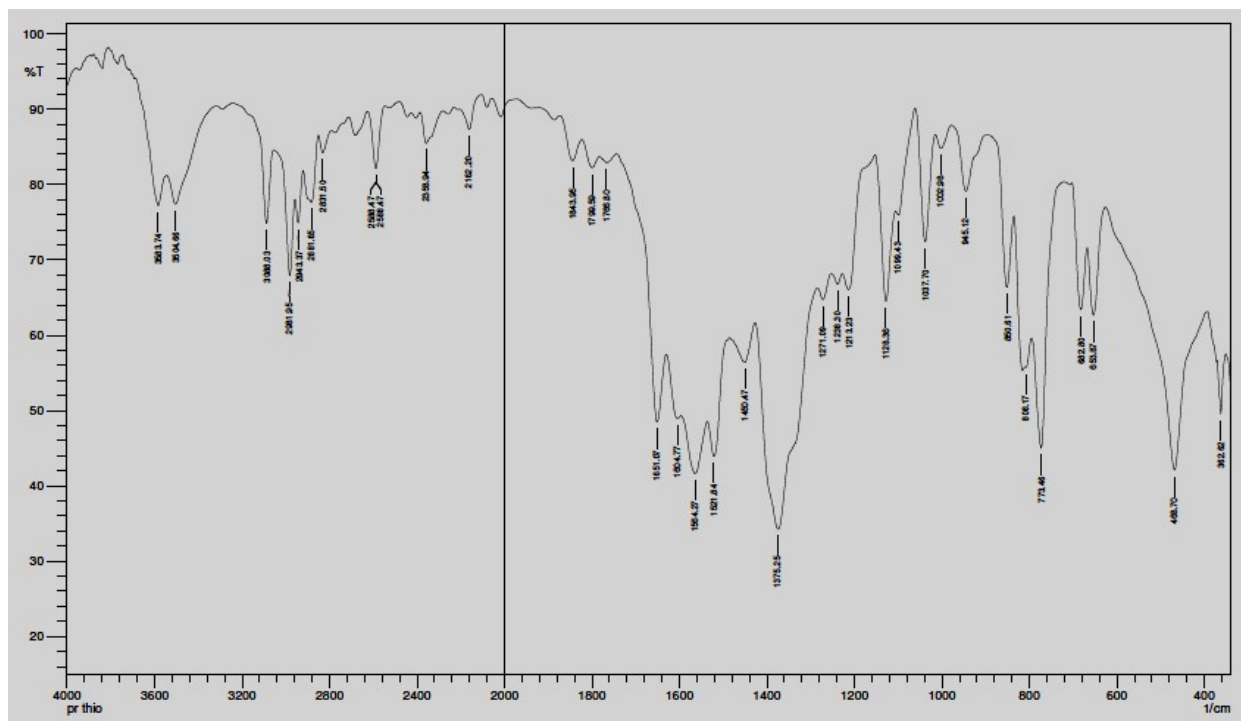

S1 (b) FT-IR spectrum of CP 2

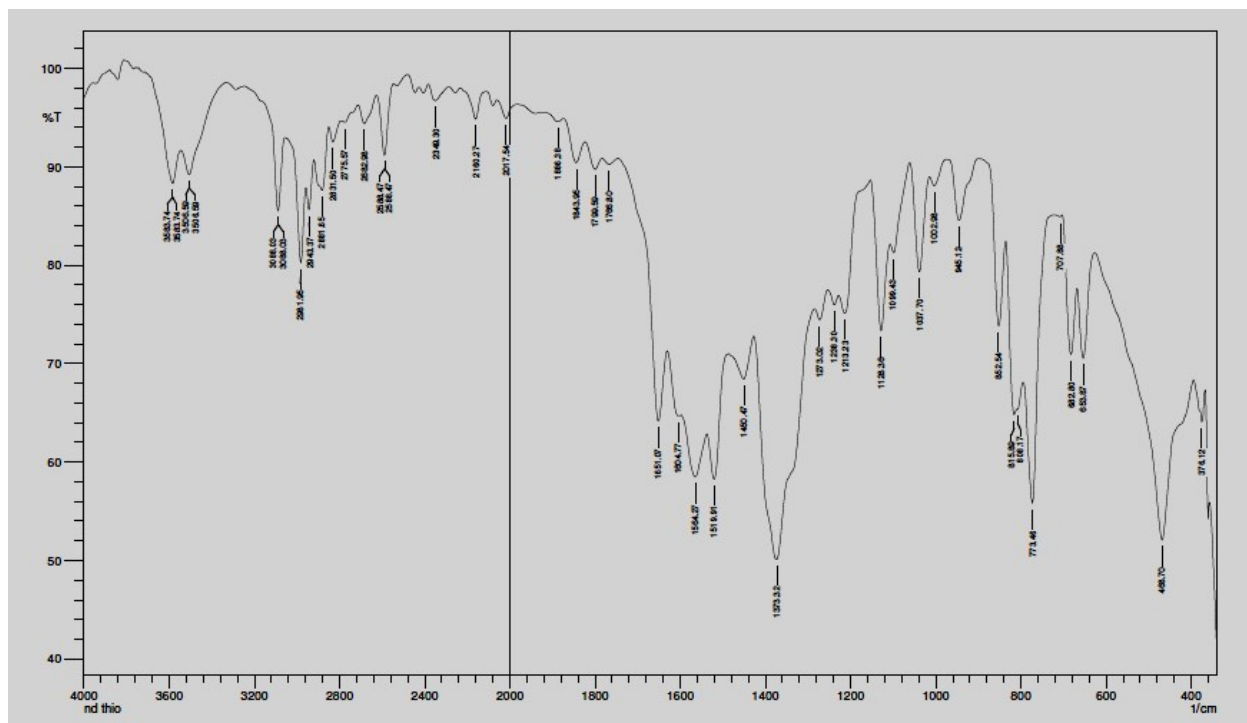

S1 (c) FT-IR spectrum of CP 3

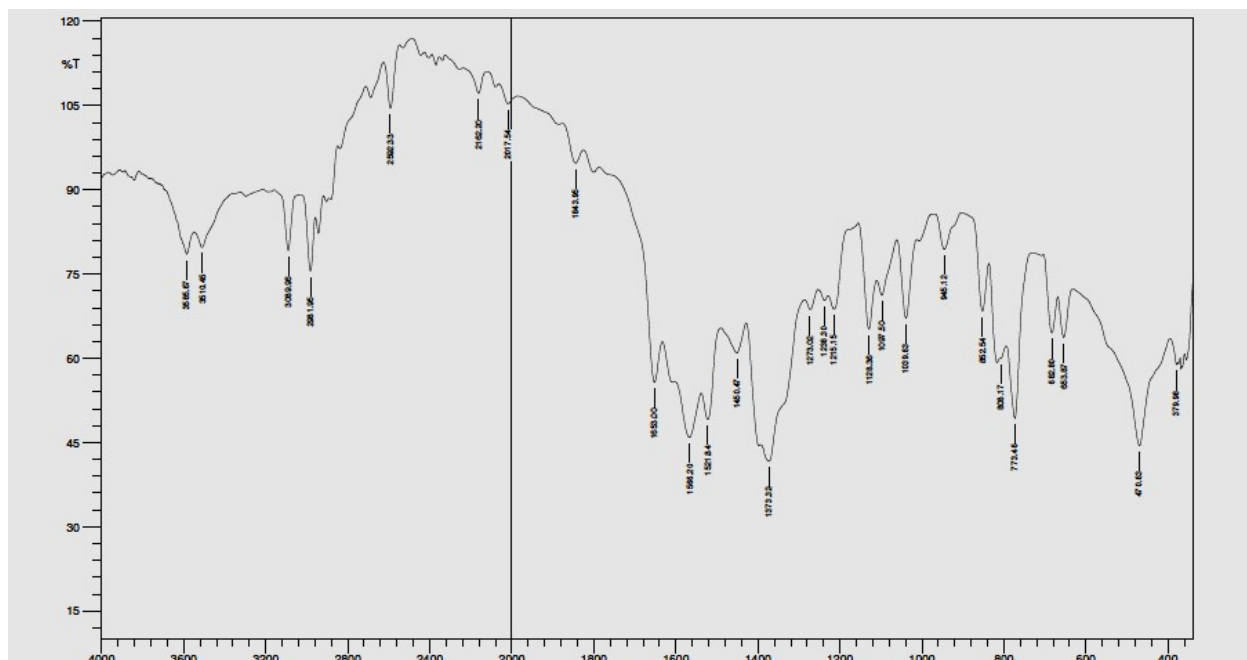

S1 (d) FT-IR spectrum of CP 4

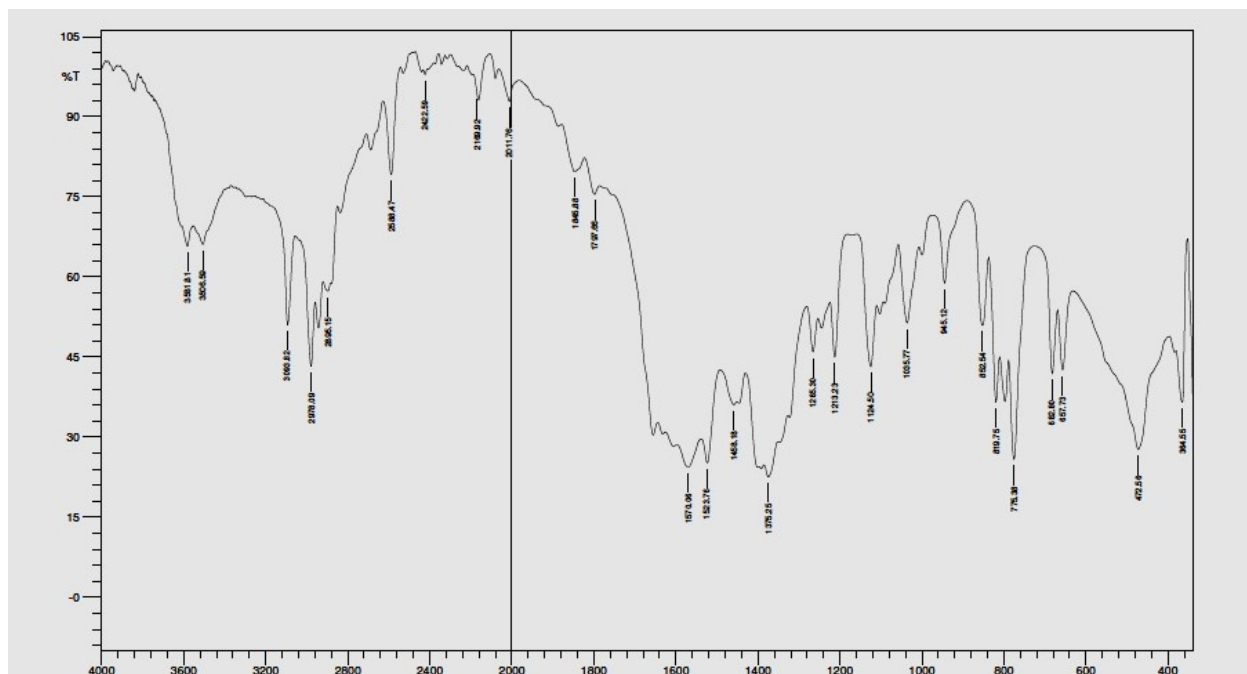

S1 (e) FT-IR spectrum of CP 5

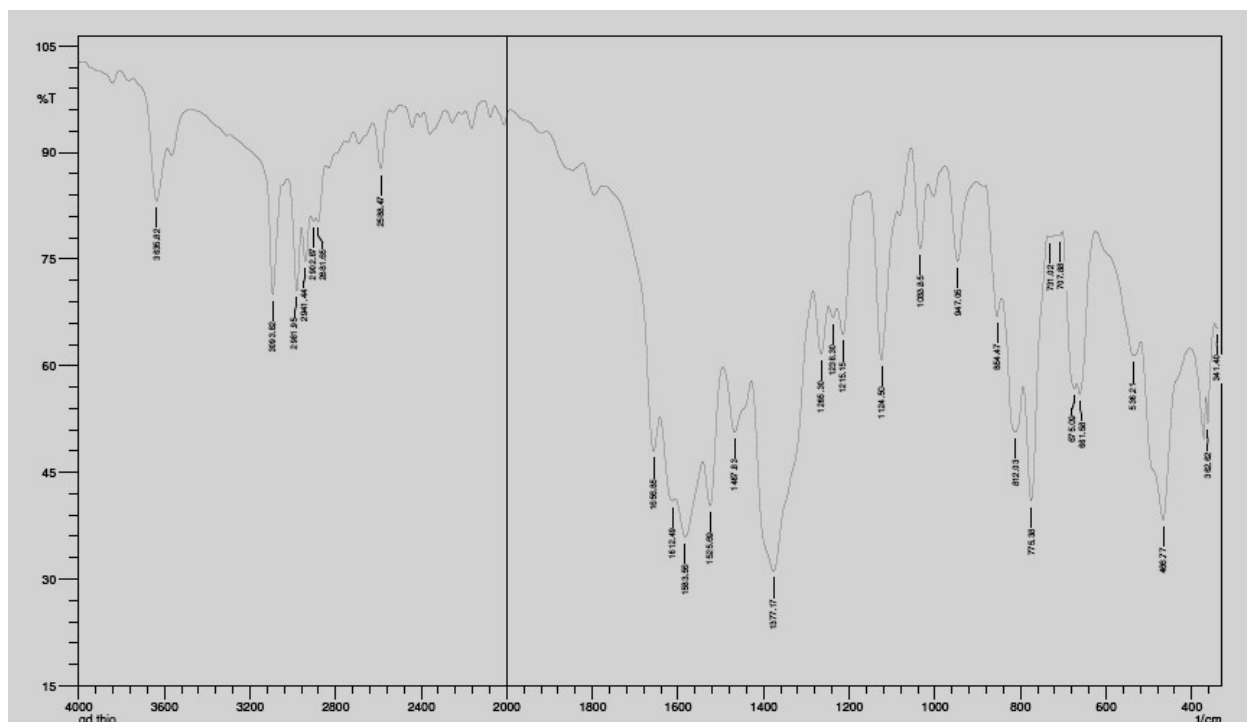

S1 (f) FT-IR spectrum of CP 6

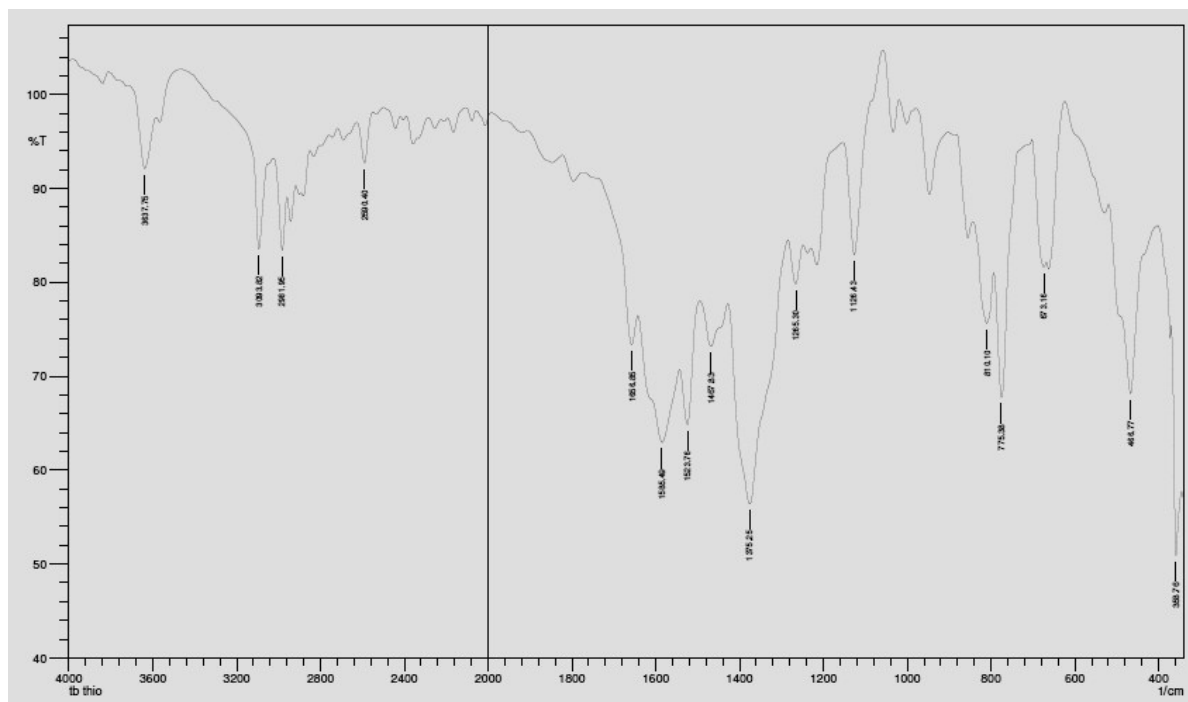

S1 (g) FT-IR spectrum of CP 7

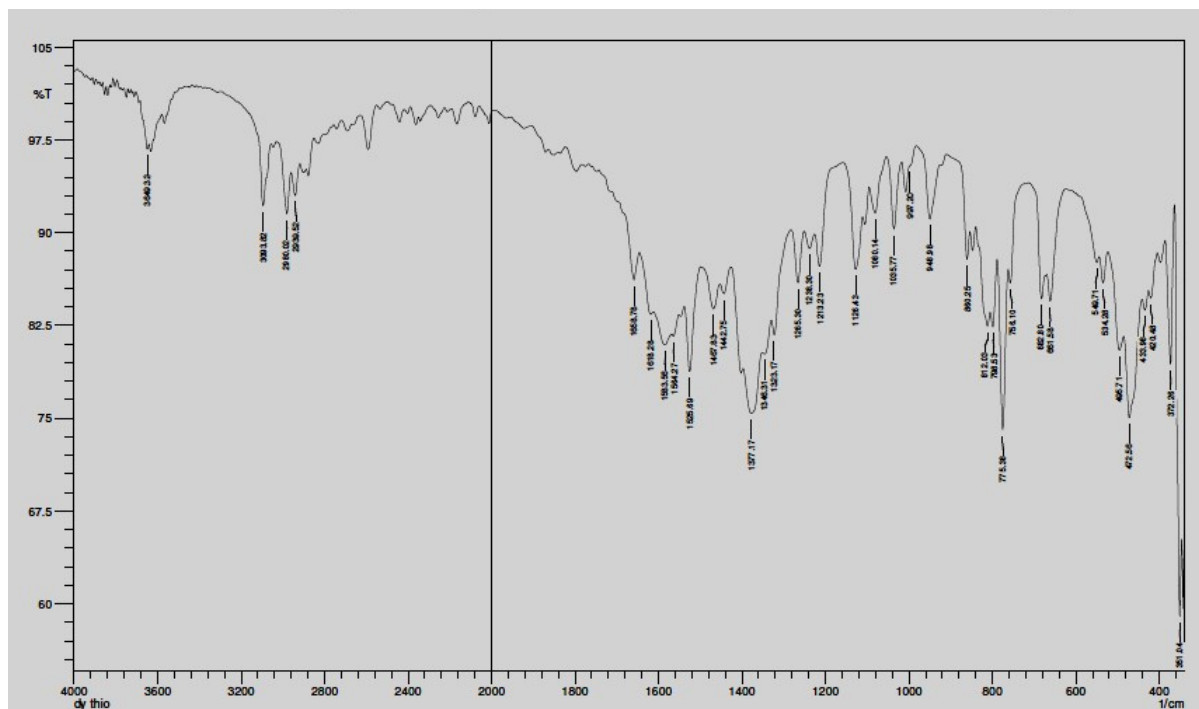

S1 (h) FT-IR spectrum of CP 8

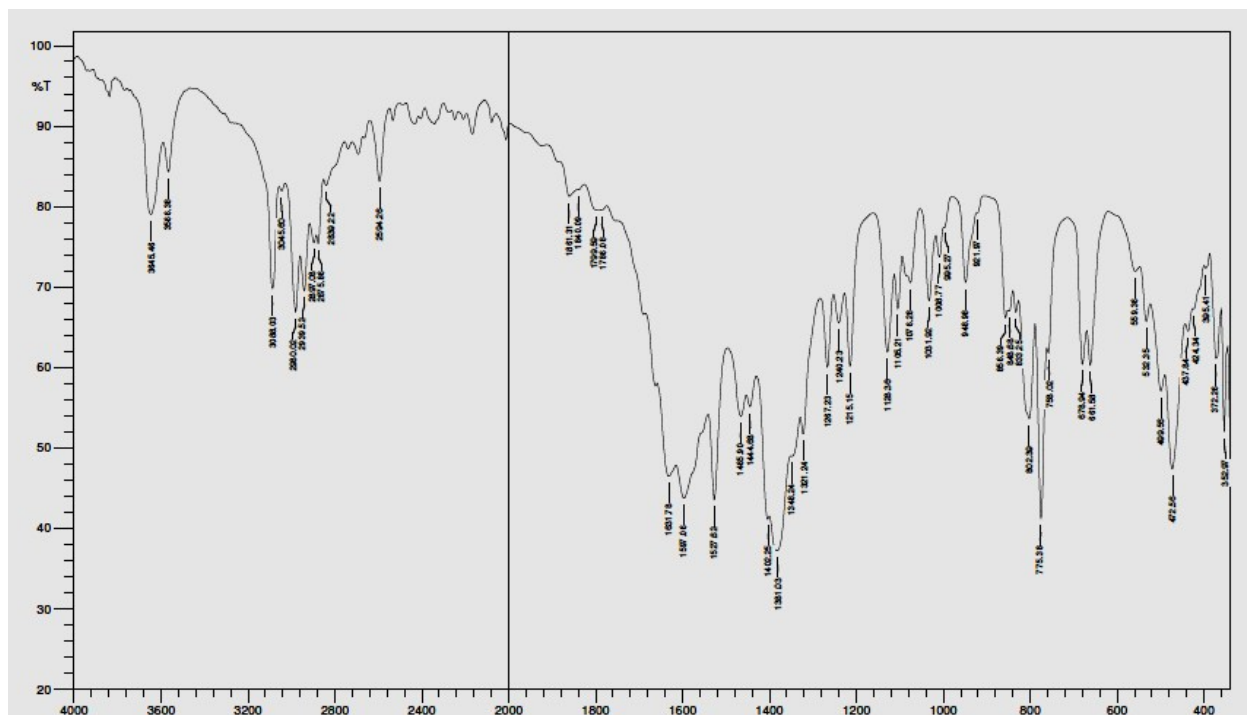

S1 (i) FT-IR spectrum of CP 9

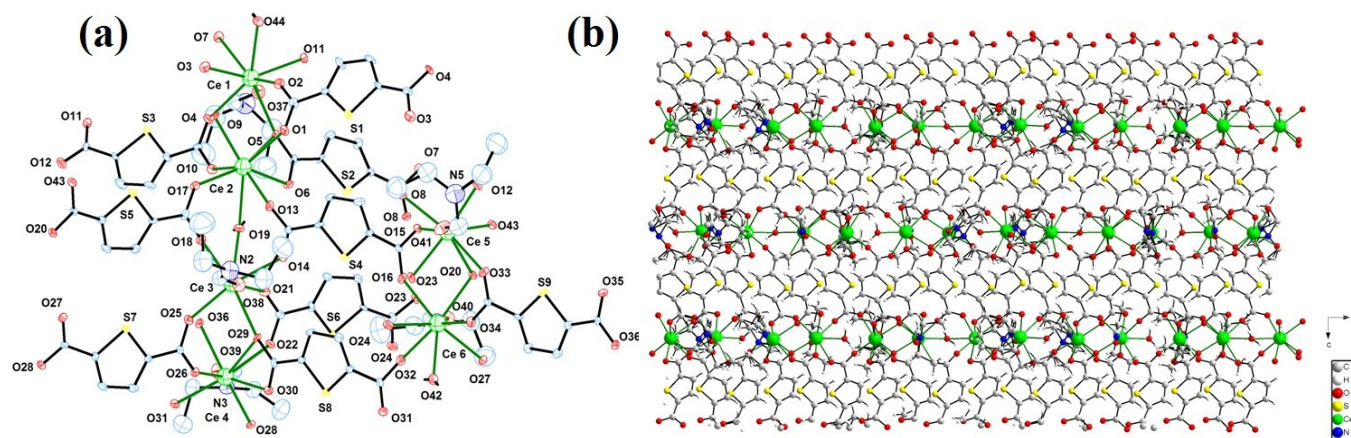

S 2. (a) ORTEP diagram of CP 1 (b) View of CP 1 along b-axis.





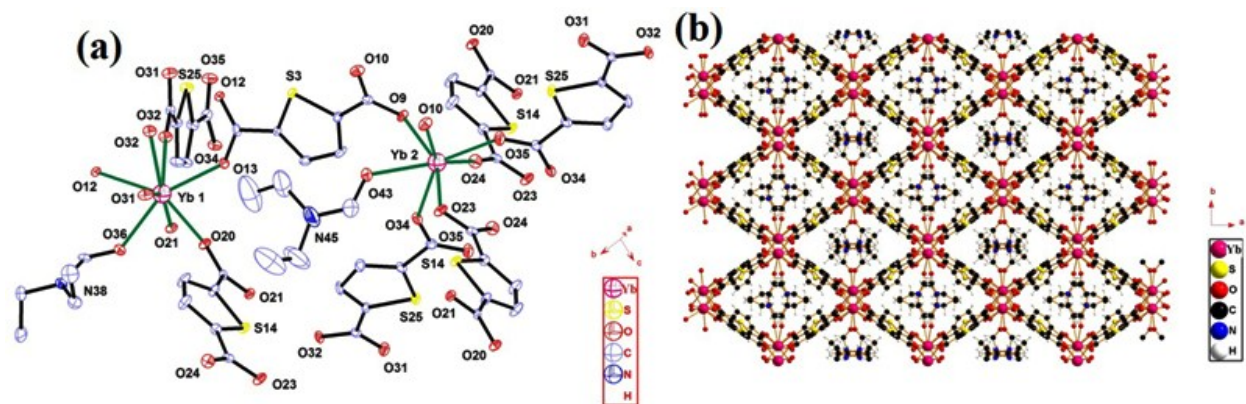

S 6. (a) ORTEP diagram of CP 9 (b) View of CP 9 along b-axis.

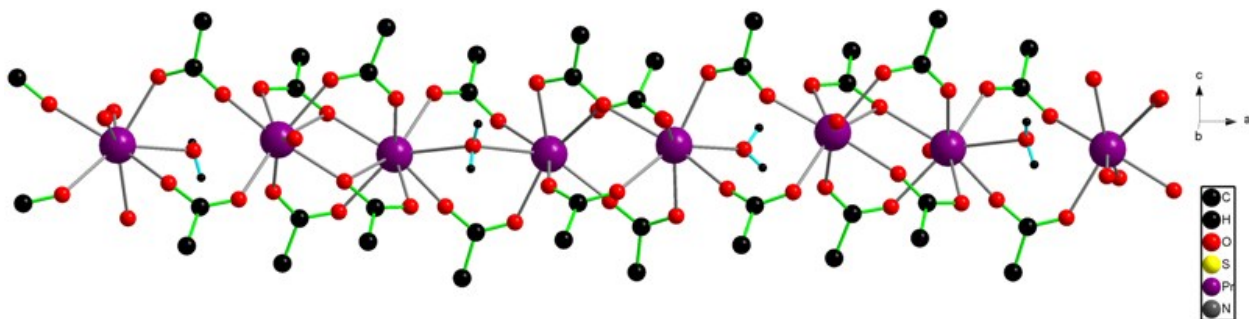

S 7. (a) The 1D rod shape SBU in CP 1.

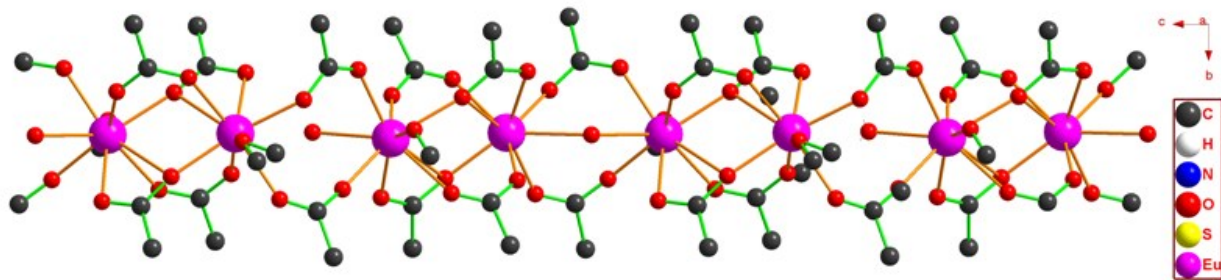

S 7. (b) The 1D rod shape SBU in CP 2.

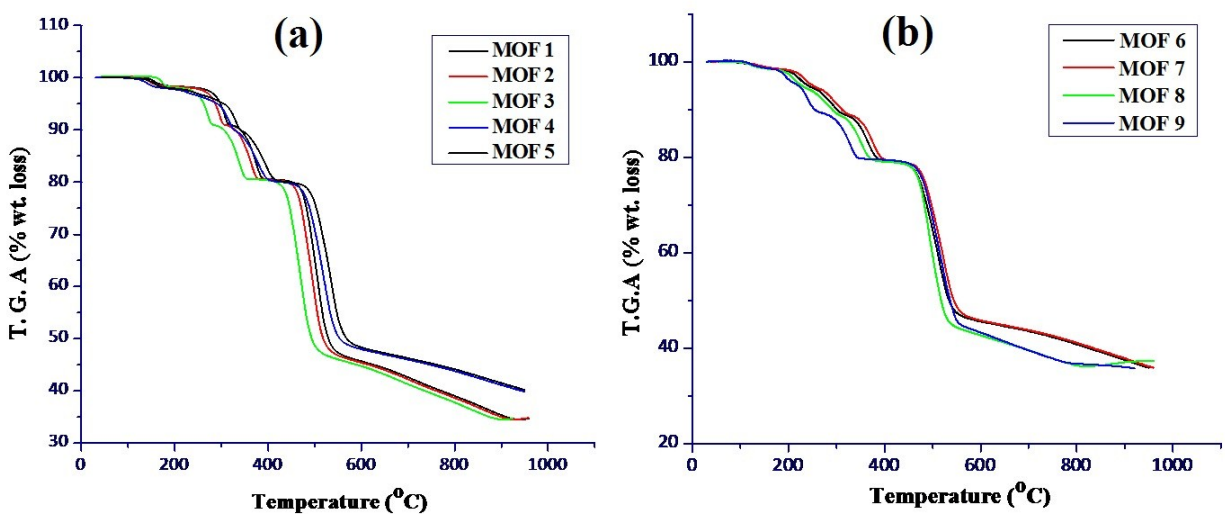

S 8 (a) T.G.A of CP 1-5 (b) T.G.A of CP 6-9.



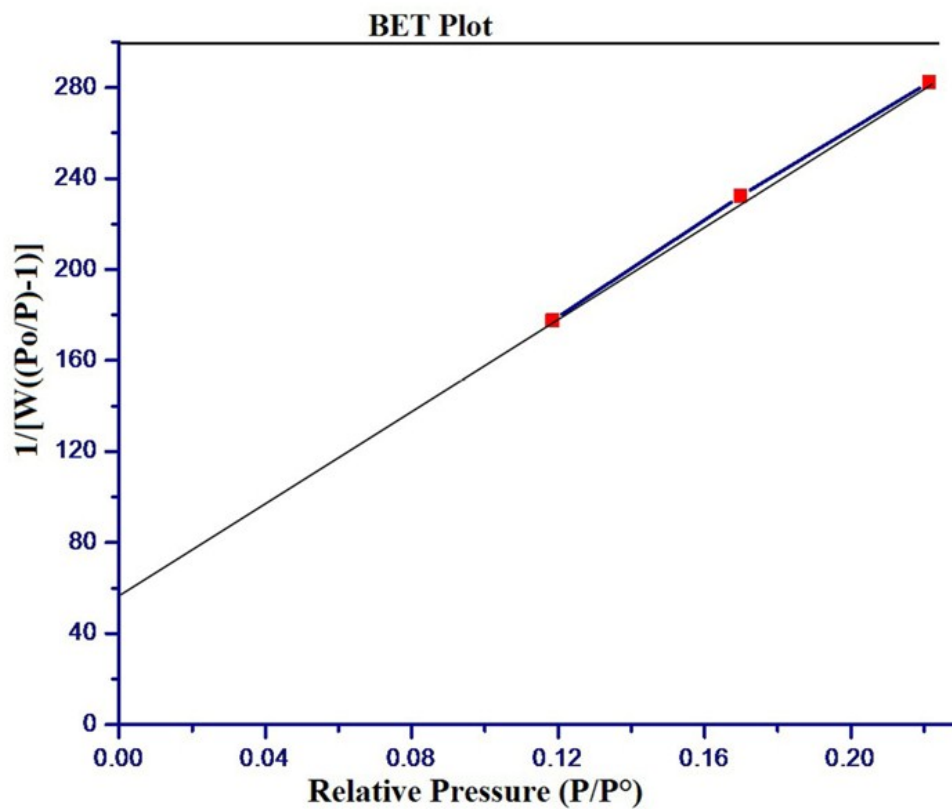

S9 (a). BET plot for CP 1.

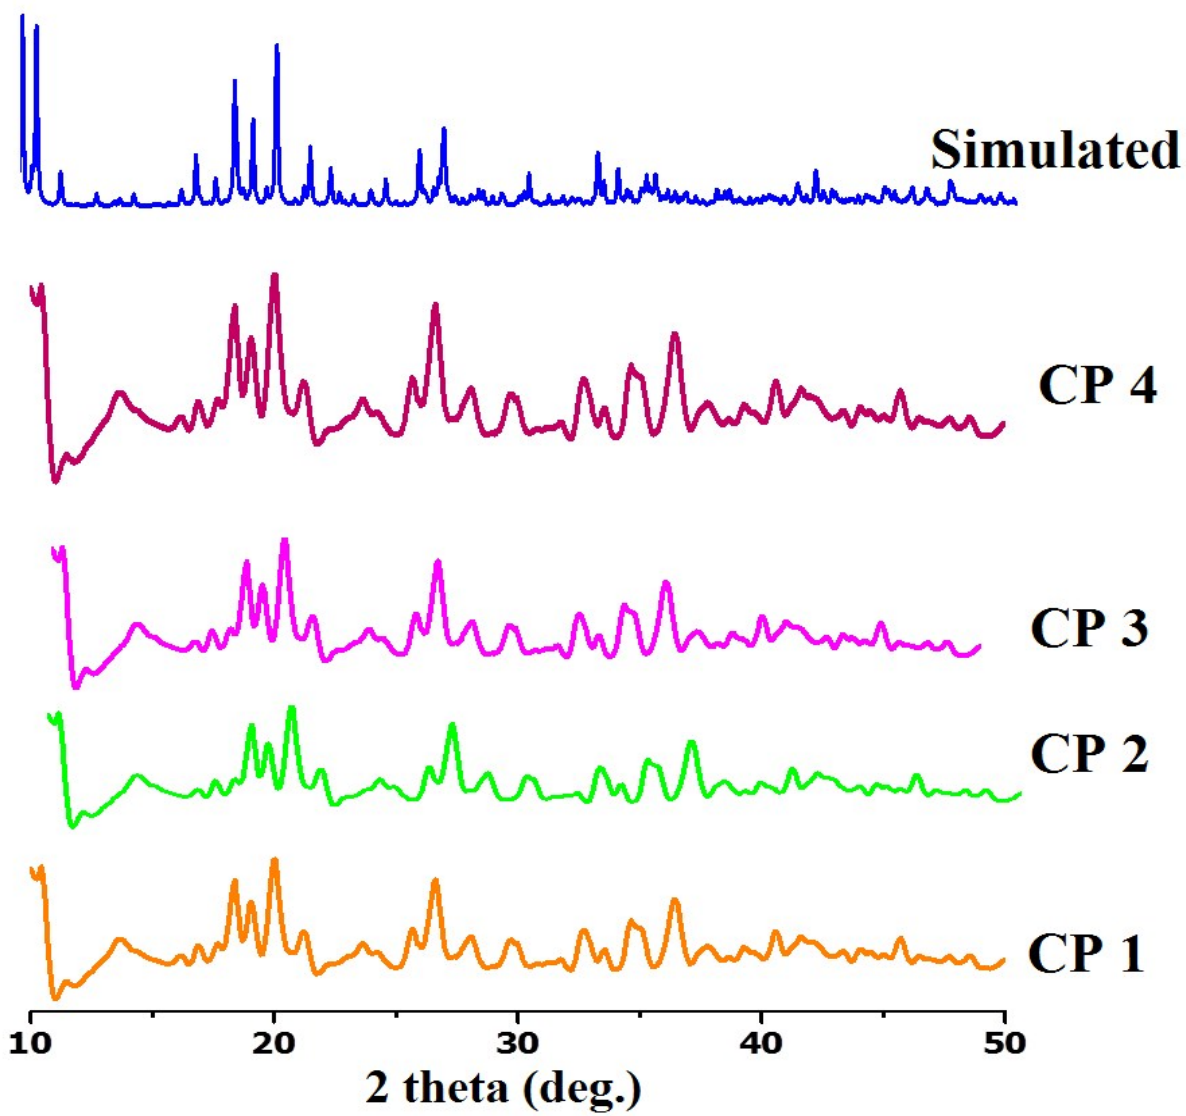

S10. (a) PXR D patterns of CPs 1 - 4, compared with a simulated pattern.

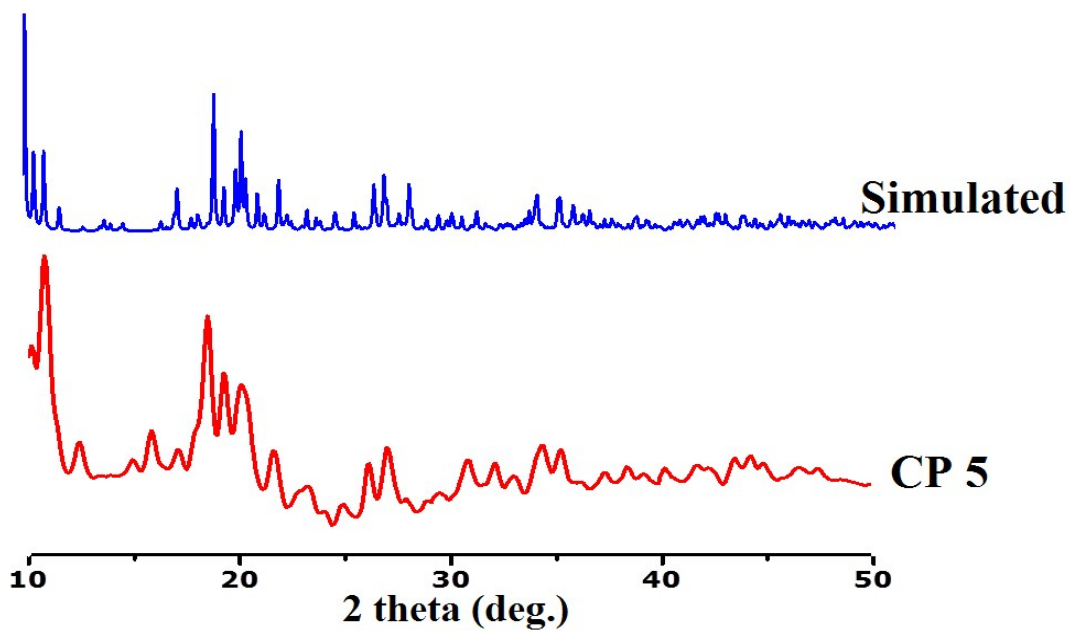

S10. (b) PXRd pattern of CP 5, compared with a simulated pattern.

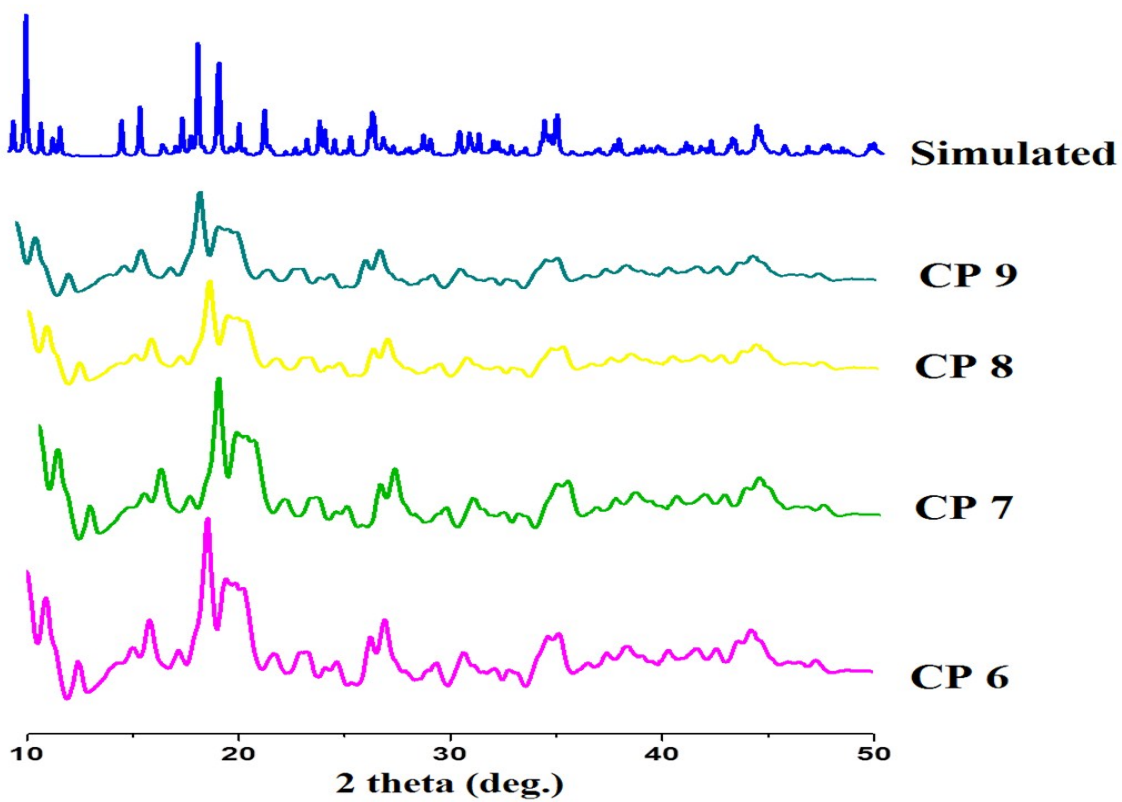

S10. (c) PXRd patterns of CP 6 - 9, compared with a simulated pattern.

**Table S1. Bond lengths [Å] and angles [°] for CPs 1-9.**

---

| 1           |           |               |           |
|-------------|-----------|---------------|-----------|
| C(1)-O(1)   | 1.242(19) | C(32)-C(33)   | 1.39(2)   |
| C(1)-O(2)   | 1.249(18) | C(32)-S(6)    | 1.700(17) |
| C(1)-C(2)   | 1.47(2)   | C(33)-C(34)   | 1.42(2)   |
| C(2)-C(3)   | 1.35(2)   | C(33)-H(33)   | 0.9300    |
| C(2)-S(1)   | 1.715(15) | C(34)-C(35)   | 1.35(2)   |
| C(3)-C(4)   | 1.41(2)   | C(34)-H(34)   | 0.9300    |
| C(3)-H(3)   | 0.9300    | C(35)-C(36)   | 1.47(2)   |
| C(4)-C(5)   | 1.34(2)   | C(35)-S(6)    | 1.709(14) |
| C(4)-H(4)   | 0.9300    | C(36)-O(24)   | 1.26(2)   |
| C(5)-C(6)   | 1.44(2)   | C(36)-O(23)   | 1.265(18) |
| C(5)-S(1)   | 1.712(15) | C(36)-Ce(6)#2 | 3.065(15) |
| C(6)-O(3)   | 1.235(19) | C(37)-O(26)   | 1.23(2)   |
| C(6)-O(4)   | 1.267(18) | C(37)-O(25)   | 1.27(2)   |
| C(7)-O(6)   | 1.22(2)   | C(37)-C(38)   | 1.49(2)   |
| C(7)-O(5)   | 1.260(19) | C(38)-C(39)   | 1.36(2)   |
| C(7)-C(8)   | 1.496(19) | C(38)-S(7)    | 1.711(16) |
| C(7)-Ce(2)  | 2.982(14) | C(39)-C(40)   | 1.40(2)   |
| C(8)-C(9)   | 1.35(2)   | C(39)-H(39)   | 0.9300    |
| C(8)-S(2)   | 1.714(15) | C(40)-C(41)   | 1.33(2)   |
| C(9)-C(10)  | 1.42(2)   | C(40)-H(40)   | 0.9300    |
| C(9)-H(9)   | 0.9300    | C(41)-C(42)   | 1.49(2)   |
| C(10)-C(11) | 1.35(2)   | C(41)-S(7)    | 1.711(16) |
| C(10)-H(10) | 0.9300    | C(42)-O(27)   | 1.23(2)   |
| C(11)-C(12) | 1.50(2)   | C(42)-O(28)   | 1.278(18) |
| C(11)-S(2)  | 1.678(15) | C(43)-O(30)   | 1.25(2)   |
| C(12)-O(8)  | 1.23(2)   | C(43)-O(29)   | 1.265(19) |
| C(12)-O(7)  | 1.252(18) | C(43)-C(44)   | 1.47(2)   |
| C(13)-O(9)  | 1.244(19) | C(43)-Ce(4)   | 3.078(17) |
| C(13)-O(10) | 1.270(18) | C(44)-C(45)   | 1.34(2)   |
| C(13)-C(14) | 1.49(2)   | C(44)-S(8)    | 1.701(15) |
| C(14)-C(15) | 1.36(2)   | C(45)-C(46)   | 1.42(2)   |
| C(14)-S(3)  | 1.713(16) | C(45)-H(45)   | 0.9300    |



|               |           |               |           |
|---------------|-----------|---------------|-----------|
| C(15)-C(16)   | 1.39(2)   | C(46)-C(47)   | 1.36(2)   |
| C(15)-H(15)   | 0.9300    | C(46)-H(46)   | 0.9300    |
| C(16)-C(17)   | 1.31(3)   | C(47)-C(48)   | 1.49(2)   |
| C(16)-H(16)   | 0.9300    | C(48)-O(32)   | 1.28(2)   |
| C(17)-C(18)   | 1.51(2)   | C(49)-O(34)   | 1.230(18) |
| C(17)-S(3)    | 1.703(15) | C(49)-O(33)   | 1.244(19) |
| C(18)-O(11)   | 1.23(2)   | C(49)-C(50)   | 1.52(2)   |
| C(18)-O(12)   | 1.27(2)   | C(50)-C(51)   | 1.35(2)   |
| C(19)-O(13)   | 1.25(2)   | C(50)-S(9)    | 1.702(15) |
| C(19)-O(14)   | 1.25(2)   | C(51)-C(52)   | 1.42(2)   |
| C(19)-C(20)   | 1.49(2)   | C(51)-H(51)   | 0.9300    |
| C(20)-C(21)   | 1.33(2)   | C(52)-C(53)   | 1.38(2)   |
| C(20)-S(4)    | 1.719(16) | C(52)-H(52)   | 0.9300    |
| C(21)-C(22)   | 1.39(2)   | C(53)-C(54)   | 1.46(2)   |
| C(21)-H(21)   | 0.9300    | C(53)-S(9)    | 1.698(16) |
| C(22)-C(23)   | 1.35(2)   | C(54)-O(36)   | 1.26(2)   |
| C(22)-H(22)   | 0.9300    | C(54)-O(35)   | 1.25(2)   |
| C(23)-C(24)   | 1.48(2)   | C(54)-Ce(3)#3 | 3.076(18) |
| C(23)-S(4)    | 1.706(16) | O(1)-Ce(2)    | 2.456(10) |
| C(24)-O(16)   | 1.240(18) | O(2)-Ce(1)    | 2.419(11) |
| C(24)-O(15)   | 1.288(17) | O(3)-Ce(1)#4  | 2.477(11) |
| C(25)-O(18)   | 1.24(2)   | O(4)-Ce(2)#4  | 2.373(10) |
| C(25)-O(17)   | 1.25(2)   | O(5)-Ce(1)    | 2.521(10) |
| C(25)-C(26)   | 1.47(2)   | O(5)-Ce(2)    | 2.791(11) |
| C(26)-C(27)   | 1.37(2)   | O(6)-Ce(2)    | 2.487(11) |
| C(26)-S(5)    | 1.716(15) | O(7)-Ce(1)#5  | 2.399(11) |
| C(27)-C(28)   | 1.41(2)   | O(8)-Ce(5)#2  | 2.443(10) |
| C(27)-H(27)   | 0.9300    | O(9)-Ce(1)    | 2.527(11) |
| C(28)-C(29)   | 1.36(2)   | O(10)-Ce(2)   | 2.407(10) |
| C(28)-H(28)   | 0.9300    | O(11)-Ce(1)#6 | 2.488(11) |
| C(29)-C(30)   | 1.489(19) | O(12)-Ce(5)#7 | 2.325(10) |
| C(29)-S(5)    | 1.705(15) | O(13)-Ce(2)   | 2.359(10) |
| C(30)-O(20)   | 1.260(17) | O(14)-Ce(3)   | 2.492(11) |
| C(30)-O(43)   | 1.257(19) | O(15)-Ce(5)   | 2.441(11) |
| C(30)-Ce(5)#1 | 3.041(13) | O(16)-Ce(6)   | 2.539(10) |
| C(31)-O(21)   | 1.25(2)   | O(17)-Ce(2)   | 2.482(11) |

|                 |           |                |           |
|-----------------|-----------|----------------|-----------|
| C(31)-O(22)     | 1.27(2)   | O(18)-Ce(3)    | 2.377(11) |
| C(31)-C(32)     | 1.50(2)   | O(19)-Ce(3)    | 2.683(9)  |
| C(47)-S(8)      | 1.712(16) | O(19)-H(19B)   | 0.86(3)   |
| C(48)-O(31)     | 1.20(2)   | O(20)-Ce(6)#1  | 2.464(10) |
| O(19)-Ce(2)     | 2.773(9)  | O(20)-Ce(5)#1  | 2.820(10) |
| O(19)-H(19A)    | 0.86(3)   | O(21)-Ce(3)    | 2.441(11) |
| O(26)-Ce(4)     | 2.426(10) | O(22)-Ce(4)    | 2.474(10) |
| O(27)-Ce(6)#1   | 2.483(11) | O(23)-Ce(5)#2  | 2.413(10) |
| O(28)-Ce(4)#8   | 2.359(10) | O(23)-Ce(6)#2  | 2.893(11) |
| O(29)-Ce(3)     | 2.450(10) | O(24)-Ce(6)#2  | 2.516(11) |
| O(29)-Ce(4)     | 2.854(11) | O(25)-Ce(3)    | 2.524(10) |
| O(30)-Ce(4)     | 2.539(11) | O(32)-Ce(6)    | 2.377(12) |
| O(31)-Ce(4)#9   | 2.476(11) | O(33)-Ce(5)    | 2.440(10) |
| O(42)-H(42B)    | 0.86(3)   | O(34)-Ce(6)    | 2.453(10) |
| O(43)-Ce(5)#1   | 2.546(10) | O(35)-Ce(3)#3  | 2.554(11) |
| O(44)-Ce(1)     | 2.604(10) | O(36)-Ce(4)#3  | 2.433(10) |
| O(44)-H(44A)    | 0.85(3)   | O(36)-Ce(3)#3  | 2.840(10) |
| O(44)-H(44B)    | 0.85(3)   | O(42)-Ce(6)    | 2.638(10) |
| Ce(1)-O(7)#6    | 2.399(11) | O(42)-H(42A)   | 0.86(3)   |
| Ce(1)-O(37)     | 2.472(15) | Ce(5)-O(41)    | 2.548(13) |
| Ce(1)-O(3)#10   | 2.477(11) | Ce(5)-O(20)#14 | 2.820(11) |
| Ce(1)-O(11)#5   | 2.488(11) | Ce(5)-C(30)#14 | 3.042(14) |
| Ce(1)-H(44A)    | 2.20(17)  | Ce(6)-O(40)    | 2.451(12) |
| Ce(2)-O(4)#10   | 2.373(10) | Ce(6)-O(20)#14 | 2.464(10) |
| Ce(2)-C(59')#11 | 3.09(6)   | Ce(6)-O(27)#14 | 2.483(11) |
| Ce(2)-H(19B)    | 2.40(16)  | Ce(6)-O(24)#11 | 2.516(11) |
| Ce(3)-O(38)     | 2.515(11) | Ce(6)-O(23)#11 | 2.893(11) |
| Ce(3)-O(35)#7   | 2.555(11) | Ce(6)-C(36)#11 | 3.065(15) |
| Ce(3)-O(36)#7   | 2.840(10) | N(1)-C(55)     | 1.47(3)   |
| Ce(3)-C(54)#7   | 3.076(18) | N(1)-C(58)     | 1.52(3)   |
| Ce(4)-O(28)#12  | 2.360(10) | N(1)-C(56)     | 1.54(3)   |
| Ce(4)-O(39)     | 2.437(13) | C(55)-O(37)    | 1.12(4)   |
| Ce(4)-O(36)#7   | 2.433(10) | C(55)-H(55)    | 0.9300    |
| Ce(4)-O(31)#13  | 2.476(11) | C(56)-C(57)    | 1.59(3)   |
| Ce(5)-O(12)#3   | 2.325(11) | C(56)-H(56A)   | 0.9700    |
| Ce(5)-O(23)#11  | 2.413(10) | C(56)-H(56B)   | 0.9700    |

|                |           |                |         |
|----------------|-----------|----------------|---------|
| Ce(5)-O(8)#11  | 2.443(10) | C(57)-H(57A)   | 0.9600  |
| Ce(5)-O(43)#14 | 2.546(10) | C(57)-H(57B)   | 0.9600  |
| C(58)-H(58B)   | 0.9700    | C(57)-H(57C)   | 0.9600  |
| C(59)-H(59A)   | 0.9600    | C(58)-C(59)    | 1.59(3) |
| C(59)-H(59B)   | 0.9600    | C(58)-H(58A)   | 0.9700  |
| C(59)-H(59C)   | 0.9600    | N(1')-C(55')   | 1.46(3) |
| N(3)-C(68)     | 1.47(2)   | N(1')-C(56')   | 1.46(3) |
| N(3)-C(66)     | 1.48(2)   | N(1')-C(58')   | 1.48(3) |
| C(65)-O(39)    | 1.22(3)   | C(55')-O(37)   | 1.48(8) |
| C(65)-H(65)    | 0.9300    | C(55')-H(55')  | 0.9300  |
| C(66)-C(67)    | 1.56(3)   | C(56')-C(57')  | 1.48(3) |
| C(66)-H(66A)   | 0.9700    | C(56')-H(56C)  | 0.9700  |
| C(66)-H(66B)   | 0.9700    | C(56')-H(56D)  | 0.9700  |
| C(67)-H(67A)   | 0.9600    | C(57')-H(57D)  | 0.9600  |
| C(67)-H(67B)   | 0.9600    | C(57')-H(57E)  | 0.9600  |
| C(67)-H(67C)   | 0.9600    | C(57')-H(57F)  | 0.9600  |
| C(68)-C(69)    | 1.52(3)   | C(58')-C(59')  | 1.56(3) |
| C(68)-H(68A)   | 0.9700    | C(58')-H(58C)  | 0.9700  |
| C(68)-H(68B)   | 0.9700    | C(58')-H(58D)  | 0.9700  |
| C(69)-H(69A)   | 0.9600    | C(59')-Ce(2)#2 | 3.09(6) |
| C(69)-H(69B)   | 0.9600    | C(59')-H(59D)  | 0.9600  |
| C(69)-H(69C)   | 0.9600    | C(59')-H(59E)  | 0.9600  |
| N(3')-C(65')   | 1.42(2)   | C(59')-H(59F)  | 0.9600  |
| N(3')-C(66')   | 1.47(2)   | O(38)-C(60)    | 1.23(2) |
| N(3')-C(68')   | 1.47(2)   | N(2)-C(60)     | 1.43(2) |
| C(65')-O(39)   | 1.23(3)   | N(2)-C(63)     | 1.48(2) |
| C(65')-H(65')  | 0.9300    | N(2)-C(61)     | 1.51(2) |
| C(66')-C(67')  | 1.53(3)   | C(60)-H(60)    | 0.9300  |
| C(66')-H(66C)  | 0.9700    | C(61)-C(62)    | 1.56(3) |
| C(66')-H(66D)  | 0.9700    | C(61)-H(61A)   | 0.9700  |
| C(67')-H(67D)  | 0.9600    | C(61)-H(61B)   | 0.9700  |
| C(67')-H(67E)  | 0.9600    | C(62)-H(62A)   | 0.9600  |
| C(67')-H(67F)  | 0.9600    | C(62)-H(62B)   | 0.9600  |
| C(68')-C(69')  | 1.54(3)   | C(62)-H(624)   | 0.9600  |
| C(68')-H(68C)  | 0.9700    | C(63)-C(64)    | 1.51(3) |
| C(68')-H(68D)  | 0.9700    | C(63)-H(63A)   | 0.9700  |

|                |           |                   |           |
|----------------|-----------|-------------------|-----------|
| C(69')-H(69D)  | 0.9600    | C(63)-H(63B)      | 0.9700    |
| C(69')-H(69E)  | 0.9600    | C(64)-H(64A)      | 0.9600    |
| C(69')-H(69F)  | 0.9600    | C(64)-H(64B)      | 0.9600    |
| O(40)-C(70)    | 1.22(2)   | C(64)-H(64C)      | 0.9600    |
| N(4)-C(70)     | 1.366(19) | N(3)-C(65)        | 1.45(2)   |
| N(4)-C(71)     | 1.46(2)   | C(76')-H(76C)     | 0.9700    |
| N(4)-C(73)     | 1.47(2)   | C(76')-H(76D)     | 0.9700    |
| C(70)-H(70)    | 0.9300    | C(77')-H(77D)     | 0.9600    |
| C(71)-C(72)    | 1.52(3)   | C(77')-H(77E)     | 0.9600    |
| C(71)-H(71A)   | 0.9700    | C(77')-H(77F)     | 0.9600    |
| C(71)-H(71B)   | 0.9700    | C(78')-C(79')     | 1.53(3)   |
| C(72)-H(72A)   | 0.9600    | C(78')-H(78C)     | 0.9700    |
| C(72)-H(72B)   | 0.9600    | C(78')-H(78D)     | 0.9700    |
| C(72)-H(72C)   | 0.9600    | C(79')-H(79D)     | 0.9600    |
| C(73)-C(74)    | 1.55(3)   | C(79')-H(79E)     | 0.9600    |
| C(73)-H(73A)   | 0.9700    | C(79')-H(79F)     | 0.9600    |
| C(73)-H(73B)   | 0.9700    | C(77)-H(77C)      | 0.9600    |
| C(74)-H(74A)   | 0.9600    | C(78)-C(79)       | 1.54(3)   |
| C(74)-H(74B)   | 0.9600    | C(78)-H(78A)      | 0.9700    |
| C(74)-H(74C)   | 0.9600    | C(78)-H(78B)      | 0.9700    |
| N(5)-C(76)     | 1.45(3)   | C(79)-H(79A)      | 0.9600    |
| N(5)-C(78)     | 1.48(3)   | C(79)-H(79B)      | 0.9600    |
| N(5)-C(75)     | 1.49(3)   | C(79)-H(79C)      | 0.9600    |
| C(75)-O(41)    | 1.24(3)   | N(5')-C(75')      | 1.45(2)   |
| C(75)-H(75)    | 0.9300    | N(5')-C(76')      | 1.46(3)   |
| C(76)-C(77)    | 1.55(3)   | N(5')-C(78')      | 1.47(3)   |
| C(76)-H(76A)   | 0.9700    | C(75')-O(41)      | 1.19(2)   |
| C(76)-H(76B)   | 0.9700    | C(75')-H(75')     | 0.9300    |
| C(77)-H(77A)   | 0.9600    | C(76')-C(77')     | 1.52(3)   |
| C(77)-H(77B)   | 0.9600    | C(29)-C(28)-C(27) | 112.0(15) |
| O(1)-C(1)-O(2) | 126.1(15) | C(29)-C(28)-H(28) | 124.0     |
| O(1)-C(1)-C(2) | 119.4(13) | C(27)-C(28)-H(28) | 124.0     |
| O(2)-C(1)-C(2) | 114.4(14) | C(28)-C(29)-C(30) | 126.4(14) |
| C(3)-C(2)-C(1) | 128.6(15) | C(28)-C(29)-S(5)  | 112.1(11) |
| C(3)-C(2)-S(1) | 110.4(12) | C(30)-C(29)-S(5)  | 121.5(12) |
| C(1)-C(2)-S(1) | 120.9(12) | O(20)-C(30)-O(43) | 122.3(13) |



|                   |           |                     |           |
|-------------------|-----------|---------------------|-----------|
| C(2)-C(3)-C(4)    | 113.7(16) | O(20)-C(30)-C(29)   | 120.0(13) |
| C(2)-C(3)-H(3)    | 123.1     | O(43)-C(30)-C(29)   | 117.7(13) |
| C(4)-C(3)-H(3)    | 123.1     | O(20)-C(30)-Ce(5)#1 | 67.9(7)   |
| C(5)-C(4)-C(3)    | 112.3(15) | O(43)-C(30)-Ce(5)#1 | 55.3(7)   |
| C(5)-C(4)-H(4)    | 123.8     | C(29)-C(30)-Ce(5)#1 | 167.7(11) |
| C(3)-C(4)-H(4)    | 123.8     | O(21)-C(31)-O(22)   | 126.8(16) |
| C(4)-C(5)-C(6)    | 128.3(14) | O(21)-C(31)-C(32)   | 117.8(16) |
| C(4)-C(5)-S(1)    | 111.6(12) | O(22)-C(31)-C(32)   | 114.9(16) |
| C(6)-C(5)-S(1)    | 120.1(12) | C(33)-C(32)-C(31)   | 124.6(16) |
| O(3)-C(6)-O(4)    | 121.6(14) | C(33)-C(32)-S(6)    | 112.9(12) |
| O(3)-C(6)-C(5)    | 119.3(14) | C(31)-C(32)-S(6)    | 122.3(13) |
| O(4)-C(6)-C(5)    | 119.0(14) | C(32)-C(33)-C(34)   | 110.0(15) |
| O(6)-C(7)-O(5)    | 123.5(13) | C(32)-C(33)-H(33)   | 125.0     |
| O(6)-C(7)-C(8)    | 118.9(14) | C(34)-C(33)-H(33)   | 125.0     |
| O(5)-C(7)-C(8)    | 117.6(14) | C(35)-C(34)-C(33)   | 113.5(15) |
| O(6)-C(7)-Ce(2)   | 54.8(7)   | C(35)-C(34)-H(34)   | 123.3     |
| O(5)-C(7)-Ce(2)   | 69.0(8)   | C(33)-C(34)-H(34)   | 123.3     |
| C(8)-C(7)-Ce(2)   | 172.5(11) | C(34)-C(35)-C(36)   | 128.2(14) |
| C(9)-C(8)-C(7)    | 130.5(14) | C(34)-C(35)-S(6)    | 112.2(11) |
| C(9)-C(8)-S(2)    | 110.1(12) | C(36)-C(35)-S(6)    | 119.6(12) |
| C(7)-C(8)-S(2)    | 119.4(12) | O(24)-C(36)-O(23)   | 122.2(14) |
| C(8)-C(9)-C(10)   | 113.9(15) | O(24)-C(36)-C(35)   | 119.0(14) |
| C(8)-C(9)-H(9)    | 123.0     | O(23)-C(36)-C(35)   | 118.7(14) |
| C(10)-C(9)-H(9)   | 123.0     | O(24)-C(36)-Ce(6)#2 | 52.9(7)   |
| C(11)-C(10)-C(9)  | 110.4(15) | O(23)-C(36)-Ce(6)#2 | 70.2(8)   |
| C(11)-C(10)-H(10) | 124.8     | C(35)-C(36)-Ce(6)#2 | 168.8(11) |
| C(9)-C(10)-H(10)  | 124.8     | O(26)-C(37)-O(25)   | 127.4(15) |
| C(10)-C(11)-C(12) | 124.2(14) | O(26)-C(37)-C(38)   | 116.9(15) |
| C(10)-C(11)-S(2)  | 113.2(11) | O(25)-C(37)-C(38)   | 115.7(15) |
| C(12)-C(11)-S(2)  | 122.5(12) | C(39)-C(38)-C(37)   | 128.5(16) |
| O(8)-C(12)-O(7)   | 123.8(15) | C(39)-C(38)-S(7)    | 111.4(12) |
| O(8)-C(12)-C(11)  | 118.6(13) | C(37)-C(38)-S(7)    | 120.0(12) |
| O(7)-C(12)-C(11)  | 117.6(15) | C(38)-C(39)-C(40)   | 112.2(16) |
| O(9)-C(13)-O(10)  | 127.7(15) | C(38)-C(39)-H(39)   | 123.9     |
| O(9)-C(13)-C(14)  | 117.7(14) | C(40)-C(39)-H(39)   | 123.9     |
| O(10)-C(13)-C(14) | 114.5(13) | C(41)-C(40)-C(39)   | 113.3(15) |

|                   |           |                   |           |
|-------------------|-----------|-------------------|-----------|
| C(15)-C(14)-C(13) | 129.3(15) | C(41)-C(40)-H(40) | 123.4     |
| C(15)-C(14)-S(3)  | 110.7(12) | C(39)-C(40)-H(40) | 123.4     |
| C(13)-C(14)-S(3)  | 119.9(12) | C(40)-C(41)-C(42) | 128.5(15) |
| C(14)-C(15)-C(16) | 111.2(15) | C(40)-C(41)-S(7)  | 111.9(13) |
| C(14)-C(15)-H(15) | 124.4     | C(42)-C(41)-S(7)  | 119.6(12) |
| C(16)-C(15)-H(15) | 124.4     | O(27)-C(42)-O(28) | 126.0(14) |
| C(17)-C(16)-C(15) | 115.9(16) | O(27)-C(42)-C(41) | 120.3(14) |
| C(17)-C(16)-H(16) | 122.1     | O(28)-C(42)-C(41) | 113.5(14) |
| C(15)-C(16)-H(16) | 122.1     | O(30)-C(43)-O(29) | 120.9(15) |
| C(16)-C(17)-C(18) | 129.6(15) | O(30)-C(43)-C(44) | 119.3(15) |
| C(16)-C(17)-S(3)  | 110.4(13) | O(29)-C(43)-C(44) | 119.7(16) |
| C(18)-C(17)-S(3)  | 120.0(13) | O(30)-C(43)-Ce(4) | 53.4(8)   |
| O(11)-C(18)-O(12) | 127.9(15) | O(29)-C(43)-Ce(4) | 67.9(9)   |
| O(11)-C(18)-C(17) | 119.5(15) | C(44)-C(43)-Ce(4) | 169.2(12) |
| O(12)-C(18)-C(17) | 112.0(15) | C(45)-C(44)-C(43) | 126.4(15) |
| O(13)-C(19)-O(14) | 125.0(16) | C(45)-C(44)-S(8)  | 113.2(11) |
| O(13)-C(19)-C(20) | 116.8(16) | C(43)-C(44)-S(8)  | 120.4(12) |
| O(14)-C(19)-C(20) | 118.1(15) | C(44)-C(45)-C(46) | 111.1(14) |
| C(21)-C(20)-C(19) | 127.8(15) | C(44)-C(45)-H(45) | 124.4     |
| C(21)-C(20)-S(4)  | 112.2(13) | C(46)-C(45)-H(45) | 124.4     |
| C(19)-C(20)-S(4)  | 120.0(13) | C(47)-C(46)-C(45) | 113.2(16) |
| C(20)-C(21)-C(22) | 112.7(15) | C(47)-C(46)-H(46) | 123.4     |
| C(20)-C(21)-H(21) | 123.6     | C(45)-C(46)-H(46) | 123.4     |
| C(22)-C(21)-H(21) | 123.6     | C(46)-C(47)-C(48) | 126.9(15) |
| C(23)-C(22)-C(21) | 112.9(15) | C(46)-C(47)-S(8)  | 111.0(12) |
| C(23)-C(22)-H(22) | 123.5     | C(48)-C(47)-S(8)  | 122.0(13) |
| C(21)-C(22)-H(22) | 123.5     | O(31)-C(48)-O(32) | 126.4(16) |
| C(22)-C(23)-C(24) | 129.5(15) | O(31)-C(48)-C(47) | 120.8(15) |
| C(22)-C(23)-S(4)  | 111.4(12) | O(32)-C(48)-C(47) | 112.8(16) |
| C(24)-C(23)-S(4)  | 119.0(12) | O(34)-C(49)-O(33) | 126.7(15) |
| O(16)-C(24)-O(15) | 123.4(13) | O(34)-C(49)-C(50) | 115.8(14) |
| O(16)-C(24)-C(23) | 119.8(13) | O(33)-C(49)-C(50) | 117.3(13) |
| O(15)-C(24)-C(23) | 116.3(14) | C(51)-C(50)-C(49) | 124.8(14) |
| O(18)-C(25)-O(17) | 123.4(16) | C(51)-C(50)-S(9)  | 114.6(12) |
| O(18)-C(25)-C(26) | 116.2(16) | C(49)-C(50)-S(9)  | 120.5(11) |
| O(17)-C(25)-C(26) | 120.3(15) | C(50)-C(51)-C(52) | 109.9(15) |

|                       |           |                     |           |
|-----------------------|-----------|---------------------|-----------|
| C(27)-C(26)-C(25)     | 124.9(15) | C(50)-C(51)-H(51)   | 125.0     |
| C(27)-C(26)-S(5)      | 110.4(11) | C(52)-C(51)-H(51)   | 125.0     |
| C(25)-C(26)-S(5)      | 124.7(13) | C(53)-C(52)-C(51)   | 113.2(15) |
| C(26)-C(27)-C(28)     | 113.4(15) | C(53)-C(52)-H(52)   | 123.4     |
| C(26)-C(27)-H(27)     | 123.3     | C(51)-C(52)-H(52)   | 123.4     |
| C(28)-C(27)-H(27)     | 123.3     | C(52)-C(53)-C(54)   | 128.8(15) |
| C(50)-S(9)-C(53)      | 91.1(8)   | C(52)-C(53)-S(9)    | 111.2(12) |
| O(7)#6-Ce(1)-O(2)     | 137.6(4)  | C(54)-C(53)-S(9)    | 120.0(13) |
| O(7)#6-Ce(1)-O(37)    | 77.8(5)   | O(36)-C(54)-O(35)   | 121.1(15) |
| O(2)-Ce(1)-O(37)      | 138.1(5)  | O(36)-C(54)-C(53)   | 120.3(16) |
| O(7)#6-Ce(1)-O(3)#10  | 73.9(4)   | O(35)-C(54)-C(53)   | 118.4(15) |
| O(2)-Ce(1)-O(3)#10    | 83.0(4)   | O(36)-C(54)-Ce(3)#3 | 67.3(9)   |
| O(37)-Ce(1)-O(3)#10   | 136.8(5)  | O(35)-C(54)-Ce(3)#3 | 54.2(9)   |
| O(7)#6-Ce(1)-O(11)#5  | 98.3(5)   | C(53)-C(54)-Ce(3)#3 | 166.7(13) |
| O(2)-Ce(1)-O(11)#5    | 80.5(4)   | C(1)-O(1)-Ce(2)     | 130.0(10) |
| O(37)-Ce(1)-O(11)#5   | 70.9(5)   | C(1)-O(2)-Ce(1)     | 145.9(11) |
| O(3)#10-Ce(1)-O(11)#5 | 144.8(4)  | C(6)-O(3)-Ce(1)#4   | 114.0(10) |
| O(7)#6-Ce(1)-O(5)     | 153.6(4)  | C(6)-O(4)-Ce(2)#4   | 173.6(11) |
| O(2)-Ce(1)-O(5)       | 68.8(4)   | C(7)-O(5)-Ce(1)     | 166.6(10) |
| O(37)-Ce(1)-O(5)      | 79.4(4)   | C(7)-O(5)-Ce(2)     | 86.0(8)   |
| O(3)#10-Ce(1)-O(5)    | 115.7(4)  | Ce(1)-O(5)-Ce(2)    | 106.6(3)  |
| O(11)#5-Ce(1)-O(5)    | 86.8(4)   | C(7)-O(6)-Ce(2)     | 101.5(9)  |
| O(7)#6-Ce(1)-O(9)     | 86.3(4)   | C(12)-O(7)-Ce(1)#5  | 172.5(12) |
| O(2)-Ce(1)-O(9)       | 121.8(4)  | C(12)-O(8)-Ce(5)#2  | 132.8(10) |
| O(37)-Ce(1)-O(9)      | 71.0(5)   | C(13)-O(9)-Ce(1)    | 141.1(10) |
| O(3)#10-Ce(1)-O(9)    | 75.1(4)   | C(13)-O(10)-Ce(2)   | 132.2(10) |
| O(11)#5-Ce(1)-O(9)    | 139.7(4)  | C(18)-O(11)-Ce(1)#6 | 123.7(11) |
| O(5)-Ce(1)-O(9)       | 73.6(3)   | C(18)-O(12)-Ce(5)#7 | 143.6(12) |
| O(7)#6-Ce(1)-O(44)    | 70.6(4)   | C(19)-O(13)-Ce(2)   | 144.2(14) |
| O(2)-Ce(1)-O(44)      | 68.1(4)   | C(19)-O(14)-Ce(3)   | 130.2(11) |
| O(37)-Ce(1)-O(44)     | 128.9(4)  | C(24)-O(15)-Ce(5)   | 134.4(10) |
| O(3)#10-Ce(1)-O(44)   | 69.9(4)   | C(24)-O(16)-Ce(6)   | 141.6(9)  |
| O(11)#5-Ce(1)-O(44)   | 75.1(4)   | C(25)-O(17)-Ce(2)   | 128.5(11) |
| O(5)-Ce(1)-O(44)      | 135.4(4)  | C(25)-O(18)-Ce(3)   | 170.3(13) |
| O(9)-Ce(1)-O(44)      | 142.1(4)  | Ce(3)-O(19)-Ce(2)   | 122.0(4)  |
| O(7)#6-Ce(1)-H(44A)   | 67(4)     | Ce(3)-O(19)-H(19A)  | 100(9)    |

|                      |           |                       |           |
|----------------------|-----------|-----------------------|-----------|
| O(2)-Ce(1)-H(44A)    | 77(3)     | Ce(2)-O(19)-H(19A)    | 123(10)   |
| O(37)-Ce(1)-H(44A)   | 111.7(19) | Ce(3)-O(19)-H(19B)    | 148(10)   |
| O(3)#10-Ce(1)-H(44A) | 86(2)     | Ce(2)-O(19)-H(19B)    | 56(10)    |
| O(11)#5-Ce(1)-H(44A) | 60(3)     | H(19A)-O(19)-H(19B)   | 106(5)    |
| O(5)-Ce(1)-H(44A)    | 136(4)    | C(30)-O(20)-Ce(6)#1   | 168.2(10) |
| O(9)-Ce(1)-H(44A)    | 151(4)    | C(30)-O(20)-Ce(5)#1   | 87.7(8)   |
| O(44)-Ce(1)-H(44A)   | 18.0(17)  | Ce(6)#1-O(20)-Ce(5)#1 | 104.1(3)  |
| O(13)-Ce(2)-O(4)#10  | 144.2(4)  | C(31)-O(21)-Ce(3)     | 136.3(12) |
| O(13)-Ce(2)-O(10)    | 135.1(4)  | C(31)-O(22)-Ce(4)     | 133.7(11) |
| O(4)#10-Ce(2)-O(10)  | 76.2(4)   | C(36)-O(23)-Ce(5)#2   | 167.4(11) |
| O(13)-Ce(2)-O(1)     | 81.5(4)   | C(36)-O(23)-Ce(6)#2   | 85.5(9)   |
| O(4)#10-Ce(2)-O(1)   | 80.7(4)   | Ce(5)#2-O(23)-Ce(6)#2 | 103.4(3)  |
| O(10)-Ce(2)-O(1)     | 137.2(4)  | C(36)-O(24)-Ce(6)#2   | 103.6(9)  |
| O(13)-Ce(2)-O(17)    | 83.8(4)   | C(37)-O(25)-Ce(3)     | 135.3(10) |
| O(4)#10-Ce(2)-O(17)  | 81.2(4)   | C(37)-O(26)-Ce(4)     | 134.4(12) |
| O(10)-Ce(2)-O(17)    | 86.6(5)   | C(42)-O(27)-Ce(6)#1   | 133.4(10) |
| O(1)-Ce(2)-O(17)     | 124.8(5)  | C(42)-O(28)-Ce(4)#8   | 144.4(10) |
| O(13)-Ce(2)-O(6)     | 77.8(4)   | C(43)-O(29)-Ce(3)     | 167.8(11) |
| O(4)#10-Ce(2)-O(6)   | 129.9(4)  | C(43)-O(29)-Ce(4)     | 87.8(10)  |
| O(10)-Ce(2)-O(6)     | 85.3(4)   | Ce(3)-O(29)-Ce(4)     | 104.3(3)  |
| O(1)-Ce(2)-O(6)      | 82.6(4)   | C(43)-O(30)-Ce(4)     | 103.3(10) |
| O(17)-Ce(2)-O(6)     | 144.3(4)  | C(48)-O(31)-Ce(4)#9   | 133.1(11) |
| O(13)-Ce(2)-O(19)    | 71.3(4)   | C(48)-O(32)-Ce(6)     | 163.3(15) |
| O(4)#10-Ce(2)-O(19)  | 137.8(4)  | C(49)-O(33)-Ce(5)     | 135.3(10) |
| O(10)-Ce(2)-O(19)    | 64.1(4)   | C(49)-O(34)-Ce(6)     | 138.2(10) |
| O(1)-Ce(2)-O(19)     | 138.9(4)  | C(54)-O(35)-Ce(3)#3   | 102.5(10) |
| O(17)-Ce(2)-O(19)    | 83.0(4)   | C(54)-O(36)-Ce(4)#3   | 166.3(11) |
| O(6)-Ce(2)-O(19)     | 62.3(4)   | C(54)-O(36)-Ce(3)#3   | 88.5(10)  |
| O(13)-Ce(2)-O(5)     | 121.1(3)  | Ce(4)#3-O(36)-Ce(3)#3 | 105.2(3)  |
| O(4)#10-Ce(2)-O(5)   | 81.3(4)   | Ce(6)-O(42)-H(42A)    | 142(10)   |
| O(10)-Ce(2)-O(5)     | 70.5(4)   | Ce(6)-O(42)-H(42B)    | 105(10)   |
| O(1)-Ce(2)-O(5)      | 70.8(4)   | H(42A)-O(42)-H(42B)   | 107(5)    |
| O(17)-Ce(2)-O(5)     | 153.9(4)  | C(30)-O(43)-Ce(5)#1   | 100.7(8)  |
| O(6)-Ce(2)-O(5)      | 48.5(3)   | Ce(1)-O(44)-H(44A)    | 53(10)    |
| O(19)-Ce(2)-O(5)     | 97.4(3)   | Ce(1)-O(44)-H(44B)    | 126(10)   |
| O(13)-Ce(2)-C(7)     | 98.4(4)   | H(44A)-O(44)-H(44B)   | 109(5)    |



|                         |          |                         |           |
|-------------------------|----------|-------------------------|-----------|
| O(4)#10-Ce(2)-C(7)      | 106.2(4) | C(5)-S(1)-C(2)          | 91.9(8)   |
| O(10)-Ce(2)-C(7)        | 78.4(4)  | C(11)-S(2)-C(8)         | 92.1(8)   |
| O(1)-Ce(2)-C(7)         | 74.2(5)  | C(17)-S(3)-C(14)        | 91.6(8)   |
| O(17)-Ce(2)-C(7)        | 161.0(5) | C(23)-S(4)-C(20)        | 90.6(8)   |
| O(6)-Ce(2)-C(7)         | 23.7(4)  | C(29)-S(5)-C(26)        | 92.1(8)   |
| O(19)-Ce(2)-C(7)        | 79.9(4)  | C(32)-S(6)-C(35)        | 91.4(8)   |
| O(5)-Ce(2)-C(7)         | 24.9(4)  | C(41)-S(7)-C(38)        | 91.1(8)   |
| O(13)-Ce(2)-C(59')#11   | 67.9(14) | C(44)-S(8)-C(47)        | 91.5(7)   |
| O(28)#12-Ce(4)-O(39)    | 77.3(4)  | O(4)#10-Ce(2)-C(59')#11 | 76.3(14)  |
| O(26)-Ce(4)-O(39)       | 139.2(4) | O(10)-Ce(2)-C(59')#11   | 140.9(15) |
| O(28)#12-Ce(4)-O(36)#7  | 156.4(4) | O(1)-Ce(2)-C(59')#11    | 63.1(13)  |
| O(26)-Ce(4)-O(36)#7     | 74.2(4)  | O(17)-Ce(2)-C(59')#11   | 62.0(14)  |
| O(39)-Ce(4)-O(36)#7     | 79.5(4)  | O(6)-Ce(2)-C(59')#11    | 133.8(15) |
| O(28)#12-Ce(4)-O(22)    | 88.1(4)  | O(19)-Ce(2)-C(59')#11   | 127.9(12) |
| O(26)-Ce(4)-O(22)       | 131.5(4) | O(5)-Ce(2)-C(59')#11    | 131.1(12) |
| O(39)-Ce(4)-O(22)       | 72.4(4)  | C(7)-Ce(2)-C(59')#11    | 136.3(14) |
| O(36)#7-Ce(4)-O(22)     | 81.1(4)  | O(13)-Ce(2)-H(19B)      | 77(3)     |
| O(28)#12-Ce(4)-O(31)#13 | 86.0(4)  | O(4)#10-Ce(2)-H(19B)    | 138(3)    |
| O(26)-Ce(4)-O(31)#13    | 79.2(4)  | O(10)-Ce(2)-H(19B)      | 62(3)     |
| O(39)-Ce(4)-O(31)#13    | 70.0(5)  | O(1)-Ce(2)-H(19B)       | 127(3)    |
| O(36)#7-Ce(4)-O(31)#13  | 89.8(4)  | O(17)-Ce(2)-H(19B)      | 99.9(16)  |
| O(22)-Ce(4)-O(31)#13    | 142.3(4) | O(6)-Ce(2)-H(19B)       | 46.3(19)  |
| O(28)#12-Ce(4)-O(30)    | 75.3(4)  | O(19)-Ce(2)-H(19B)      | 17.3(14)  |
| O(26)-Ce(4)-O(30)       | 79.7(4)  | O(5)-Ce(2)-H(19B)       | 80.7(15)  |
| O(39)-Ce(4)-O(30)       | 141.0(4) | C(7)-Ce(2)-H(19B)       | 62.7(14)  |
| O(36)#7-Ce(4)-O(30)     | 122.5(3) | C(59')#11-Ce(2)-H(19B)  | 141(3)    |
| O(22)-Ce(4)-O(30)       | 79.5(4)  | O(18)-Ce(3)-O(21)       | 134.6(4)  |
| O(31)#13-Ce(4)-O(30)    | 134.0(4) | O(18)-Ce(3)-O(29)       | 152.8(4)  |
| O(28)#12-Ce(4)-O(29)    | 119.3(3) | O(21)-Ce(3)-O(29)       | 72.3(4)   |
| O(26)-Ce(4)-O(29)       | 67.4(3)  | O(18)-Ce(3)-O(14)       | 93.0(4)   |
| O(39)-Ce(4)-O(29)       | 134.0(4) | O(21)-Ce(3)-O(14)       | 77.1(4)   |
| O(36)#7-Ce(4)-O(29)     | 75.2(3)  | O(29)-Ce(3)-O(14)       | 89.9(4)   |
| O(22)-Ce(4)-O(29)       | 66.2(3)  | O(18)-Ce(3)-O(38)       | 73.5(5)   |
| O(31)#13-Ce(4)-O(29)    | 146.0(4) | O(21)-Ce(3)-O(38)       | 138.2(4)  |
| O(30)-Ce(4)-O(29)       | 47.5(3)  | O(29)-Ce(3)-O(38)       | 82.2(4)   |
| O(28)#12-Ce(4)-C(43)    | 96.4(4)  | O(14)-Ce(3)-O(38)       | 70.2(4)   |

|                         |          |                       |          |
|-------------------------|----------|-----------------------|----------|
| O(26)-Ce(4)-C(43)       | 73.8(4)  | O(18)-Ce(3)-O(25)     | 84.8(4)  |
| O(39)-Ce(4)-C(43)       | 142.1(4) | O(21)-Ce(3)-O(25)     | 129.5(4) |
| O(36)#7-Ce(4)-C(43)     | 99.5(4)  | O(29)-Ce(3)-O(25)     | 76.2(3)  |
| O(22)-Ce(4)-C(43)       | 70.0(4)  | O(14)-Ce(3)-O(25)     | 141.3(4) |
| O(31)#13-Ce(4)-C(43)    | 147.7(5) | O(38)-Ce(3)-O(25)     | 72.2(4)  |
| O(30)-Ce(4)-C(43)       | 23.3(4)  | O(18)-Ce(3)-O(35)#7   | 71.7(5)  |
| O(29)-Ce(4)-C(43)       | 24.3(4)  | O(21)-Ce(3)-O(35)#7   | 84.7(5)  |
| O(12)#3-Ce(5)-O(23)#11  | 165.0(4) | O(29)-Ce(3)-O(35)#7   | 122.7(4) |
| O(12)#3-Ce(5)-O(15)     | 113.7(4) | O(14)-Ce(3)-O(35)#7   | 135.6(4) |
| O(23)#11-Ce(5)-O(15)    | 76.1(4)  | O(38)-Ce(3)-O(35)#7   | 137.0(5) |
| O(12)#3-Ce(5)-O(33)     | 98.0(4)  | O(25)-Ce(3)-O(35)#7   | 80.2(4)  |
| O(23)#11-Ce(5)-O(33)    | 81.3(4)  | O(18)-Ce(3)-O(19)     | 67.7(4)  |
| O(15)-Ce(5)-O(33)       | 133.6(4) | O(21)-Ce(3)-O(19)     | 67.3(4)  |
| O(12)#3-Ce(5)-O(8)#11   | 83.6(4)  | O(29)-Ce(3)-O(19)     | 138.0(4) |
| O(23)#11-Ce(5)-O(8)#11  | 88.3(4)  | O(14)-Ce(3)-O(19)     | 70.6(4)  |
| O(15)-Ce(5)-O(8)#11     | 75.2(4)  | O(38)-Ce(3)-O(19)     | 121.9(4) |
| O(33)-Ce(5)-O(8)#11     | 144.2(4) | O(25)-Ce(3)-O(19)     | 140.5(4) |
| O(12)#3-Ce(5)-O(43)#14  | 69.4(4)  | O(35)#7-Ce(3)-O(19)   | 65.0(4)  |
| O(23)#11-Ce(5)-O(43)#14 | 125.1(4) | O(18)-Ce(3)-O(36)#7   | 114.2(4) |
| O(15)-Ce(5)-O(43)#14    | 78.1(4)  | O(21)-Ce(3)-O(36)#7   | 69.3(4)  |
| O(33)-Ce(5)-O(43)#14    | 82.9(4)  | O(29)-Ce(3)-O(36)#7   | 75.2(3)  |
| O(8)#11-Ce(5)-O(43)#14  | 129.7(4) | O(14)-Ce(3)-O(36)#7   | 146.0(4) |
| O(12)#3-Ce(5)-O(41)     | 78.6(5)  | O(38)-Ce(3)-O(36)#7   | 135.2(4) |
| O(23)#11-Ce(5)-O(41)    | 86.9(5)  | O(25)-Ce(3)-O(36)#7   | 65.1(3)  |
| O(15)-Ce(5)-O(41)       | 143.7(6) | O(35)#7-Ce(3)-O(36)#7 | 47.5(3)  |
| O(33)-Ce(5)-O(41)       | 72.9(5)  | O(19)-Ce(3)-O(36)#7   | 100.2(3) |
| O(8)#11-Ce(5)-O(41)     | 72.4(5)  | O(18)-Ce(3)-C(54)#7   | 92.0(5)  |
| O(43)#14-Ce(5)-O(41)    | 136.4(6) | O(21)-Ce(3)-C(54)#7   | 77.5(5)  |
| O(12)#3-Ce(5)-O(20)#14  | 116.4(4) | O(29)-Ce(3)-C(54)#7   | 99.4(4)  |
| O(23)#11-Ce(5)-O(20)#14 | 77.3(3)  | O(14)-Ce(3)-C(54)#7   | 148.8(5) |
| O(15)-Ce(5)-O(20)#14    | 68.8(3)  | O(38)-Ce(3)-C(54)#7   | 140.4(5) |
| O(33)-Ce(5)-O(20)#14    | 66.9(4)  | O(25)-Ce(3)-C(54)#7   | 69.8(5)  |
| O(8)#11-Ce(5)-O(20)#14  | 143.4(4) | O(35)#7-Ce(3)-C(54)#7 | 23.4(4)  |
| O(43)#14-Ce(5)-O(20)#14 | 48.2(3)  | O(19)-Ce(3)-C(54)#7   | 83.0(4)  |
| O(41)-Ce(5)-O(20)#14    | 138.5(4) | O(36)#7-Ce(3)-C(54)#7 | 24.2(4)  |
| O(12)#3-Ce(5)-C(30)#14  | 92.1(4)  | O(28)#12-Ce(4)-O(26)  | 127.3(4) |

|                         |          |                         |         |
|-------------------------|----------|-------------------------|---------|
| O(23)#11-Ce(5)-C(30)#14 | 101.7(4) | O(42)-Ce(6)-C(36)#11    | 85.8(5) |
| O(15)-Ce(5)-C(30)#14    | 74.3(4)  | O(23)#11-Ce(6)-C(36)#11 | 24.3(4) |
| O(33)-Ce(5)-C(30)#14    | 71.4(4)  | C(55)-N(1)-C(58)        | 110(3)  |
| O(8)#11-Ce(5)-C(30)#14  | 144.4(4) | C(55)-N(1)-C(56)        | 109(3)  |
| O(43)#14-Ce(5)-C(30)#14 | 24.0(4)  | C(58)-N(1)-C(56)        | 112(4)  |
| O(41)-Ce(5)-C(30)#14    | 141.4(5) | O(37)-C(55)-N(1)        | 121(4)  |
| O(20)#14-Ce(5)-C(30)#14 | 24.4(3)  | O(37)-C(55)-H(55)       | 119.6   |
| O(32)-Ce(6)-O(40)       | 75.0(5)  | N(1)-C(55)-H(55)        | 119.6   |
| O(32)-Ce(6)-O(34)       | 138.7(4) | N(1)-C(56)-C(57)        | 121(3)  |
| O(40)-Ce(6)-O(34)       | 134.1(4) | N(1)-C(56)-H(56A)       | 106.9   |
| O(32)-Ce(6)-O(20)#14    | 149.5(4) | C(57)-C(56)-H(56A)      | 107.0   |
| O(40)-Ce(6)-O(20)#14    | 76.8(4)  | N(1)-C(56)-H(56B)       | 107.0   |
| O(34)-Ce(6)-O(20)#14    | 71.1(4)  | C(57)-C(56)-H(56B)      | 107.0   |
| O(32)-Ce(6)-O(27)#14    | 90.8(4)  | H(56A)-C(56)-H(56B)     | 106.7   |
| O(40)-Ce(6)-O(27)#14    | 70.3(4)  | C(56)-C(57)-H(57A)      | 109.5   |
| O(34)-Ce(6)-O(27)#14    | 77.9(4)  | C(56)-C(57)-H(57B)      | 109.5   |
| O(20)#14-Ce(6)-O(27)#14 | 90.4(4)  | H(57A)-C(57)-H(57B)     | 109.5   |
| O(32)-Ce(6)-O(24)#11    | 72.8(4)  | C(56)-C(57)-H(57C)      | 109.5   |
| O(40)-Ce(6)-O(24)#11    | 135.2(4) | H(57A)-C(57)-H(57C)     | 109.5   |
| O(34)-Ce(6)-O(24)#11    | 90.2(4)  | H(57B)-C(57)-H(57C)     | 109.5   |
| O(20)#14-Ce(6)-O(24)#11 | 122.5(4) | N(1)-C(58)-C(59)        | 122(3)  |
| O(27)#14-Ce(6)-O(24)#11 | 139.4(4) | N(1)-C(58)-H(58A)       | 106.9   |
| O(32)-Ce(6)-O(16)       | 84.8(4)  | C(59)-C(58)-H(58A)      | 106.9   |
| O(40)-Ce(6)-O(16)       | 71.8(4)  | N(1)-C(58)-H(58B)       | 106.9   |
| O(34)-Ce(6)-O(16)       | 127.7(4) | C(59)-C(58)-H(58B)      | 106.9   |
| O(20)#14-Ce(6)-O(16)    | 75.6(3)  | H(58A)-C(58)-H(58B)     | 106.7   |
| O(27)#14-Ce(6)-O(16)    | 141.6(4) | C(58)-C(59)-H(59A)      | 109.5   |
| O(24)#11-Ce(6)-O(16)    | 75.1(4)  | C(58)-C(59)-H(59B)      | 109.5   |
| O(32)-Ce(6)-O(42)       | 69.5(5)  | H(59A)-C(59)-H(59B)     | 109.5   |
| O(40)-Ce(6)-O(42)       | 126.1(4) | C(58)-C(59)-H(59C)      | 109.5   |
| O(34)-Ce(6)-O(42)       | 69.2(4)  | H(59A)-C(59)-H(59C)     | 109.5   |
| O(20)#14-Ce(6)-O(42)    | 138.8(4) | H(59B)-C(59)-H(59C)     | 109.5   |
| O(27)#14-Ce(6)-O(42)    | 71.1(4)  | C(55')-N(1')-C(56')     | 115(3)  |
| O(24)#11-Ce(6)-O(42)    | 68.4(4)  | C(55')-N(1')-C(58')     | 114(3)  |
| O(16)-Ce(6)-O(42)       | 140.0(4) | C(56')-N(1')-C(58')     | 108(6)  |
| O(32)-Ce(6)-O(23)#11    | 116.5(4) | N(1')-C(55')-O(37)      | 105(5)  |

|                         |          |                     |        |
|-------------------------|----------|---------------------|--------|
| O(40)-Ce(6)-O(23)#11    | 131.5(4) | N(1')-C(55')-H(55') | 127.5  |
| O(34)-Ce(6)-O(23)#11    | 69.8(4)  | N(2)-C(61)-H(61A)   | 110.2  |
| O(20)#14-Ce(6)-O(23)#11 | 75.1(3)  | C(62)-C(61)-H(61A)  | 110.2  |
| O(27)#14-Ce(6)-O(23)#11 | 147.3(4) | N(2)-C(61)-H(61B)   | 110.2  |
| O(24)#11-Ce(6)-O(23)#11 | 47.5(3)  | C(62)-C(61)-H(61B)  | 110.2  |
| O(16)-Ce(6)-O(23)#11    | 63.3(3)  | H(61A)-C(61)-H(61B) | 108.5  |
| O(42)-Ce(6)-O(23)#11    | 100.7(4) | C(61)-C(62)-H(62A)  | 109.5  |
| O(32)-Ce(6)-C(36)#11    | 93.4(4)  | C(61)-C(62)-H(62B)  | 109.5  |
| O(40)-Ce(6)-C(36)#11    | 136.2(4) | H(62A)-C(62)-H(62B) | 109.5  |
| O(34)-Ce(6)-C(36)#11    | 81.6(4)  | C(61)-C(62)-H(62A)  | 109.5  |
| O(20)#14-Ce(6)-C(36)#11 | 99.0(4)  | H(62A)-C(62)-H(62A) | 109.5  |
| O(27)#14-Ce(6)-C(36)#11 | 153.3(4) | H(62B)-C(62)-H(62A) | 109.5  |
| O(24)#11-Ce(6)-C(36)#11 | 23.5(4)  | N(2)-C(63)-C(64)    | 108(3) |
| O(16)-Ce(6)-C(36)#11    | 65.1(4)  | N(2)-C(63)-H(63A)   | 110.2  |
| O(37)-C(55')-H(55')     | 127.5    | C(64)-C(63)-H(63A)  | 110.2  |
| N(1')-C(56')-C(57')     | 137(5)   | N(2)-C(63)-H(63B)   | 110.2  |
| N(1')-C(56')-H(56C)     | 102.9    | C(64)-C(63)-H(63B)  | 110.2  |
| C(57')-C(56')-H(56C)    | 102.9    | H(63A)-C(63)-H(63B) | 108.5  |
| N(1')-C(56')-H(56D)     | 103.0    | C(63)-C(64)-H(64A)  | 109.5  |
| C(57')-C(56')-H(56D)    | 103.0    | C(63)-C(64)-H(64B)  | 109.5  |
| H(56C)-C(56')-H(56D)    | 105.1    | H(64A)-C(64)-H(64B) | 109.5  |
| C(56')-C(57')-H(57D)    | 109.5    | C(63)-C(64)-H(64C)  | 109.5  |
| C(56')-C(57')-H(57E)    | 109.5    | H(64A)-C(64)-H(64C) | 109.5  |
| H(57D)-C(57')-H(57E)    | 109.5    | H(64B)-C(64)-H(64C) | 109.5  |
| C(56')-C(57')-H(57F)    | 109.4    | C(65)-N(3)-C(68)    | 115(2) |
| H(57D)-C(57')-H(57F)    | 109.5    | C(65)-N(3)-C(66)    | 114(2) |
| H(57E)-C(57')-H(57F)    | 109.5    | C(68)-N(3)-C(66)    | 128(3) |
| N(1')-C(58')-C(59')     | 128(4)   | O(39)-C(65)-N(3)    | 124(3) |
| N(1')-C(58')-H(58C)     | 105.4    | O(39)-C(65)-H(65)   | 117.8  |
| C(59')-C(58')-H(58C)    | 105.4    | N(3)-C(65)-H(65)    | 117.8  |
| N(1')-C(58')-H(58D)     | 105.4    | N(3)-C(66)-C(67)    | 107(3) |
| C(59')-C(58')-H(58D)    | 105.4    | N(3)-C(66)-H(66A)   | 110.3  |
| H(58C)-C(58')-H(58D)    | 106.0    | C(67)-C(66)-H(66A)  | 110.3  |
| C(58')-C(59')-Ce(2)#2   | 134(5)   | N(3)-C(66)-H(66B)   | 110.3  |
| C(58')-C(59')-H(59D)    | 109.5    | C(67)-C(66)-H(66B)  | 110.3  |
| Ce(2)#2-C(59')-H(59D)   | 56.8     | H(66A)-C(66)-H(66B) | 108.5  |



|                       |           |                      |           |
|-----------------------|-----------|----------------------|-----------|
| C(58')-C(59')-H(59E)  | 109.4     | C(66)-C(67)-H(67A)   | 109.5     |
| Ce(2)#2-C(59')-H(59E) | 53.7      | C(66)-C(67)-H(67B)   | 109.5     |
| H(59D)-C(59')-H(59E)  | 109.5     | N(3')-C(68')-H(68D)  | 109.9     |
| C(58')-C(59')-H(59F)  | 109.5     | C(69')-C(68')-H(68D) | 109.9     |
| Ce(2)#2-C(59')-H(59F) | 116.0     | H(68C)-C(68')-H(68D) | 108.3     |
| H(59D)-C(59')-H(59F)  | 109.5     | C(68')-C(69')-H(69D) | 109.5     |
| H(59E)-C(59')-H(59F)  | 109.5     | C(68')-C(69')-H(69E) | 109.5     |
| C(60)-O(38)-Ce(3)     | 129.9(13) | H(69D)-C(69')-H(69E) | 109.5     |
| C(60)-N(2)-C(63)      | 117(2)    | C(68')-C(69')-H(69F) | 109.5     |
| C(60)-N(2)-C(61)      | 113(2)    | H(69D)-C(69')-H(69F) | 109.5     |
| C(63)-N(2)-C(61)      | 129(3)    | H(69E)-C(69')-H(69F) | 109.5     |
| O(38)-C(60)-N(2)      | 121(2)    | C(70)-O(40)-Ce(6)    | 127.6(12) |
| O(38)-C(60)-H(60)     | 119.3     | C(70)-N(4)-C(71)     | 123(2)    |
| N(2)-C(60)-H(60)      | 119.3     | C(70)-N(4)-C(73)     | 121(2)    |
| N(2)-C(61)-C(62)      | 108(3)    | C(71)-N(4)-C(73)     | 116(2)    |
| H(67A)-C(67)-H(67B)   | 109.5     | O(40)-C(70)-N(4)     | 123.9(19) |
| C(66)-C(67)-H(67C)    | 109.5     | O(40)-C(70)-H(70)    | 118.0     |
| H(67A)-C(67)-H(67C)   | 109.5     | N(4)-C(70)-H(70)     | 118.0     |
| H(67B)-C(67)-H(67C)   | 109.5     | N(4)-C(71)-C(72)     | 114(3)    |
| N(3)-C(68)-C(69)      | 111(3)    | N(4)-C(71)-H(71A)    | 108.9     |
| N(3)-C(68)-H(68A)     | 109.5     | C(72)-C(71)-H(71A)   | 108.9     |
| C(69)-C(68)-H(68A)    | 109.4     | N(4)-C(71)-H(71B)    | 108.9     |
| N(3)-C(68)-H(68B)     | 109.5     | C(72)-C(71)-H(71B)   | 108.9     |
| C(69)-C(68)-H(68B)    | 109.5     | H(71A)-C(71)-H(71B)  | 107.7     |
| H(68A)-C(68)-H(68B)   | 108.1     | C(71)-C(72)-H(72A)   | 109.5     |
| C(68)-C(69)-H(69A)    | 109.5     | C(71)-C(72)-H(72B)   | 109.5     |
| C(68)-C(69)-H(69B)    | 109.5     | H(72A)-C(72)-H(72B)  | 109.5     |
| H(69A)-C(69)-H(69B)   | 109.5     | C(71)-C(72)-H(72C)   | 109.5     |
| C(68)-C(69)-H(69C)    | 109.4     | H(72A)-C(72)-H(72C)  | 109.5     |
| H(69A)-C(69)-H(69C)   | 109.5     | H(72B)-C(72)-H(72C)  | 109.5     |
| H(69B)-C(69)-H(69C)   | 109.5     | N(4)-C(73)-C(74)     | 109(3)    |
| C(65')-N(3')-C(66')   | 115(2)    | N(4)-C(73)-H(73A)    | 109.9     |
| C(65')-N(3')-C(68')   | 116(2)    | C(74)-C(73)-H(73A)   | 109.9     |
| C(66')-N(3')-C(68')   | 128(3)    | N(4)-C(73)-H(73B)    | 109.9     |
| O(39)-C(65')-N(3')    | 122(3)    | C(74)-C(73)-H(73B)   | 109.9     |
| O(39)-C(65')-H(65')   | 119.2     | H(73A)-C(73)-H(73B)  | 108.3     |

|                      |        |                      |           |
|----------------------|--------|----------------------|-----------|
| N(3')-C(65')-H(65')  | 119.2  | C(73)-C(74)-H(74A)   | 109.5     |
| N(3')-C(66')-C(67')  | 109(3) | C(73)-C(74)-H(74B)   | 109.5     |
| N(3')-C(66')-H(66C)  | 110.0  | H(74A)-C(74)-H(74B)  | 109.5     |
| C(67')-C(66')-H(66C) | 110.0  | O(41)-C(75')-H(75')  | 118.6     |
| N(3')-C(66')-H(66D)  | 110.0  | N(5')-C(75')-H(75')  | 118.7     |
| C(67')-C(66')-H(66D) | 110.0  | N(5')-C(76')-C(77')  | 128(5)    |
| H(66C)-C(66')-H(66D) | 108.4  | N(5')-C(76')-H(76C)  | 105.3     |
| C(66')-C(67')-H(67D) | 109.5  | C(77')-C(76')-H(76C) | 105.3     |
| C(66')-C(67')-H(67E) | 109.5  | N(5')-C(76')-H(76D)  | 105.3     |
| H(67D)-C(67')-H(67E) | 109.5  | C(77')-C(76')-H(76D) | 105.3     |
| C(66')-C(67')-H(67F) | 109.5  | H(76C)-C(76')-H(76D) | 106.0     |
| H(67D)-C(67')-H(67F) | 109.5  | C(76')-C(77')-H(77D) | 109.5     |
| H(67E)-C(67')-H(67F) | 109.5  | C(76')-C(77')-H(77E) | 109.5     |
| N(3')-C(68')-C(69')  | 109(3) | H(77D)-C(77')-H(77E) | 109.5     |
| N(3')-C(68')-H(68C)  | 109.9  | C(76')-C(77')-H(77F) | 109.5     |
| C(69')-C(68')-H(68C) | 109.9  | H(77D)-C(77')-H(77F) | 109.5     |
| C(73)-C(74)-H(74C)   | 109.5  | H(77E)-C(77')-H(77F) | 109.5     |
| H(74A)-C(74)-H(74C)  | 109.5  | N(5')-C(78')-C(79')  | 112(4)    |
| H(74B)-C(74)-H(74C)  | 109.5  | N(5')-C(78')-H(78C)  | 109.2     |
| C(76)-N(5)-C(78)     | 110(4) | C(79')-C(78')-H(78C) | 109.2     |
| C(76)-N(5)-C(75)     | 124(3) | N(5')-C(78')-H(78D)  | 109.2     |
| C(78)-N(5)-C(75)     | 121(3) | C(79')-C(78')-H(78D) | 109.2     |
| O(41)-C(75)-N(5)     | 113(4) | H(78C)-C(78')-H(78D) | 107.9     |
| O(41)-C(75)-H(75)    | 123.7  | C(78')-C(79')-H(79D) | 109.5     |
| N(5)-C(75)-H(75)     | 123.7  | C(78')-C(79')-H(79E) | 109.5     |
| N(5)-C(76)-C(77)     | 127(5) | H(79D)-C(79')-H(79E) | 109.5     |
| N(5)-C(76)-H(76A)    | 105.7  | C(78')-C(79')-H(79F) | 109.5     |
| C(77)-C(76)-H(76A)   | 105.7  | H(79D)-C(79')-H(79F) | 109.5     |
| N(5)-C(76)-H(76B)    | 105.6  | H(79E)-C(79')-H(79F) | 109.5     |
| C(77)-C(76)-H(76B)   | 105.6  | C(55)-O(37)-Ce(1)    | 124(2)    |
| H(76A)-C(76)-H(76B)  | 106.1  | C(55')-O(37)-Ce(1)   | 130(2)    |
| C(76)-C(77)-H(77A)   | 109.5  | C(65)-O(39)-Ce(4)    | 134(2)    |
| C(76)-C(77)-H(77B)   | 109.4  | C(65')-O(39)-Ce(4)   | 131.0(18) |
| H(77A)-C(77)-H(77B)  | 109.5  | C(75')-O(41)-Ce(5)   | 134(2)    |
| C(76)-C(77)-H(77C)   | 109.5  | C(75)-O(41)-Ce(5)    | 142(4)    |
| H(77A)-C(77)-H(77C)  | 109.5  | H(79A)-C(79)-H(79B)  | 109.5     |

|                     |        |                     |        |
|---------------------|--------|---------------------|--------|
| H(77B)-C(77)-H(77C) | 109.5  | C(78)-C(79)-H(79C)  | 109.5  |
| N(5)-C(78)-C(79)    | 112(4) | H(79A)-C(79)-H(79C) | 109.5  |
| N(5)-C(78)-H(78A)   | 109.2  | H(79B)-C(79)-H(79C) | 109.5  |
| C(79)-C(78)-H(78A)  | 109.2  | C(75')-N(5')-C(76') | 126(3) |
| N(5)-C(78)-H(78B)   | 109.2  | C(75')-N(5')-C(78') | 124(3) |
| C(79)-C(78)-H(78B)  | 109.2  | C(76')-N(5')-C(78') | 109(4) |
| H(78A)-C(78)-H(78B) | 107.9  | O(41)-C(75')-N(5')  | 123(3) |
| C(78)-C(79)-H(79A)  | 109.5  | C(78)-C(79)-H(79B)  | 109.5  |

---

Symmetry transformations used to generate equivalent atoms:

#1 x,y,z-1 #2 x,y-1,z #3 x,y+1,z+1 #4 -x+1,-y+1,z+1/2 #5 -x+1,-y,z+1/2 #6 -x+1,-y,z-1/2 #7 x,y-1,z-1 #8 -x+1/2,y+1/2,z-1/2 #9 -x+1/2,y+1/2,z+1/2 #10 -x+1,-y+1,z-1/2 #11 x,y+1,z #12 -x+1/2,y-1/2,z+1/2 #13 -x+1/2,y-1/2,z-1/2 #14 x,y,z+1

## 2

|             |           |               |          |
|-------------|-----------|---------------|----------|
| C(1)-O(2)   | 1.241(11) | O(1)-Pr(2)    | 2.432(6) |
| C(1)-C(2)   | 1.474(12) | O(2)-Pr(1)    | 2.380(6) |
| C(2)-S(1)   | 1.711(9)  | O(3)-Pr(1)#4  | 2.451(6) |
| C(3)-H(3)   | 0.9300    | O(4)-Pr(2)#4  | 2.352(6) |
| C(4)-H(4)   | 0.9300    | O(5)-Pr(1)    | 2.505(6) |
| C(5)-S(1)   | 1.701(9)  | O(5)-Pr(2)    | 2.783(6) |
| C(6)-O(4)   | 1.258(11) | O(6)-Pr(2)    | 2.475(6) |
| C(7)-O(5)   | 1.254(11) | O(7)-Pr(1)#5  | 2.398(7) |
| C(7)-Pr(2)  | 2.987(10) | O(8)-Pr(5)#2  | 2.429(6) |
| C(8)-S(2)   | 1.711(9)  | O(9)-Pr(1)    | 2.508(6) |
| C(9)-H(9)   | 0.9300    | O(10)-Pr(2)   | 2.378(6) |
| C(10)-H(10) | 0.9300    | O(11)-Pr(1)#6 | 2.469(6) |
| C(11)-S(2)  | 1.709(10) | O(12)-Pr(5)#7 | 2.327(6) |
| C(12)-O(8)  | 1.248(12) | O(13)-Pr(2)   | 2.343(6) |
| C(13)-O(10) | 1.261(12) | O(14)-Pr(3)   | 2.462(6) |
| C(1)-O(1)   | 1.258(12) | O(15)-Pr(5)   | 2.425(6) |
| C(2)-C(3)   | 1.339(13) | O(16)-Pr(6)   | 2.533(6) |
| C(3)-C(4)   | 1.413(13) | O(17)-Pr(2)   | 2.475(6) |
| C(4)-C(5)   | 1.340(13) | O(18)-Pr(3)   | 2.358(6) |

|             |           |               |          |
|-------------|-----------|---------------|----------|
| C(5)-C(6)   | 1.461(12) | O(19)-Pr(3)   | 2.675(5) |
| C(6)-O(3)   | 1.240(12) | O(19)-Pr(2)   | 2.720(5) |
| C(7)-O(6)   | 1.253(12) | O(19)-H(19A)  | 0.85(3)  |
| C(7)-C(8)   | 1.469(13) | O(19)-H(19B)  | 0.84(3)  |
| C(8)-C(9)   | 1.356(14) | O(20)-Pr(6)#1 | 2.446(6) |
| C(9)-C(10)  | 1.429(13) | O(20)-Pr(5)#1 | 2.814(6) |
| C(10)-C(11) | 1.333(14) | O(21)-Pr(3)   | 2.429(6) |
| C(11)-C(12) | 1.477(12) | O(22)-Pr(4)   | 2.463(6) |
| C(12)-O(7)  | 1.231(12) | O(23)-Pr(5)#2 | 2.379(6) |
| C(13)-O(9)  | 1.245(12) | O(23)-Pr(6)#2 | 2.884(7) |
| C(13)-C(14) | 1.477(13) | O(24)-Pr(6)#2 | 2.497(7) |
| C(14)-C(15) | 1.336(13) | O(25)-Pr(3)   | 2.495(6) |
| C(14)-S(3)  | 1.695(10) | O(26)-Pr(4)   | 2.401(6) |
| C(15)-C(16) | 1.411(13) | O(27)-Pr(6)#1 | 2.458(6) |
| C(15)-H(15) | 0.9300    | O(28)-Pr(4)#8 | 2.332(6) |
| C(16)-C(17) | 1.336(14) | O(29)-Pr(3)   | 2.420(6) |
| C(16)-H(16) | 0.9300    | O(29)-Pr(4)   | 2.854(6) |
| C(17)-C(18) | 1.482(13) | O(30)-Pr(4)   | 2.519(6) |
| C(17)-S(3)  | 1.698(10) | O(31)-Pr(4)#9 | 2.453(6) |
| C(18)-O(12) | 1.251(12) | O(32)-Pr(6)   | 2.351(6) |
| C(18)-O(11) | 1.257(13) | O(33)-Pr(5)   | 2.418(6) |
| C(19)-O(14) | 1.231(13) | O(34)-Pr(6)   | 2.415(6) |
| C(19)-O(13) | 1.261(12) | O(35)-Pr(3)#3 | 2.530(6) |
| C(19)-C(20) | 1.496(14) | O(36)-Pr(4)#3 | 2.394(6) |
| C(20)-C(21) | 1.347(13) | O(36)-Pr(3)#3 | 2.845(6) |
| C(20)-S(4)  | 1.698(10) | O(42)-Pr(6)   | 2.632(6) |
| C(21)-C(22) | 1.409(12) | O(42)-H(42B)  | 0.86(3)  |
| C(21)-H(21) | 0.9300    | O(42)-H(42A)  | 0.86(3)  |
| C(22)-C(23) | 1.365(13) | O(43)-Pr(5)#1 | 2.521(6) |
| C(22)-H(22) | 0.9300    | O(44)-Pr(1)   | 2.574(6) |
| C(23)-C(24) | 1.497(13) | O(44)-H(44A)  | 0.86(3)  |
| C(23)-S(4)  | 1.705(10) | O(44)-H(44B)  | 0.86(3)  |
| C(24)-O(16) | 1.224(11) | Pr(1)-O(7)#6  | 2.398(7) |
| C(24)-O(15) | 1.272(12) | Pr(1)-O(3)#10 | 2.451(6) |
| C(25)-O(17) | 1.233(12) | Pr(1)-O(37)   | 2.463(6) |
| C(25)-O(18) | 1.249(12) | Pr(1)-O(11)#5 | 2.469(6) |

|               |           |                |           |
|---------------|-----------|----------------|-----------|
| C(25)-C(26)   | 1.487(14) | Pr(2)-O(4)#10  | 2.352(6)  |
| C(26)-C(27)   | 1.357(13) | Pr(3)-O(38)    | 2.503(7)  |
| C(26)-S(5)    | 1.706(10) | Pr(3)-O(35)#7  | 2.530(6)  |
| C(27)-C(28)   | 1.400(12) | Pr(3)-O(36)#7  | 2.845(6)  |
| C(27)-H(27)   | 0.9300    | Pr(3)-C(54)#7  | 3.040(10) |
| C(28)-C(29)   | 1.346(13) | Pr(4)-O(28)#11 | 2.331(6)  |
| C(28)-H(28)   | 0.9300    | Pr(4)-O(36)#7  | 2.394(6)  |
| C(29)-C(30)   | 1.460(12) | Pr(4)-O(31)#12 | 2.453(6)  |
| C(29)-S(5)    | 1.706(9)  | Pr(4)-O(39)    | 2.467(7)  |
| C(30)-O(43)   | 1.249(12) | Pr(5)-O(12)#3  | 2.327(6)  |
| C(30)-O(20)   | 1.270(11) | Pr(5)-O(23)#13 | 2.379(6)  |
| C(30)-Pr(5)#1 | 3.037(9)  | Pr(5)-O(8)#13  | 2.429(6)  |
| C(31)-O(22)   | 1.226(11) | Pr(5)-O(41)    | 2.464(7)  |
| C(31)-O(21)   | 1.273(11) | Pr(5)-O(43)#14 | 2.521(6)  |
| C(31)-C(32)   | 1.502(12) | Pr(5)-O(20)#14 | 2.814(6)  |
| C(32)-C(33)   | 1.347(13) | Pr(5)-C(30)#14 | 3.037(9)  |
| C(32)-S(6)    | 1.705(9)  | Pr(6)-O(20)#14 | 2.446(6)  |
| C(33)-C(34)   | 1.434(13) | Pr(6)-O(27)#14 | 2.458(6)  |
| C(33)-H(33)   | 0.9300    | Pr(6)-O(40)    | 2.472(6)  |
| C(34)-C(35)   | 1.349(13) | Pr(6)-O(24)#13 | 2.497(7)  |
| C(34)-H(34)   | 0.9300    | Pr(6)-O(23)#13 | 2.884(7)  |
| C(35)-C(36)   | 1.485(13) | Pr(6)-C(36)#13 | 3.048(10) |
| C(35)-S(6)    | 1.705(9)  | N(1)-C(55)     | 1.41(2)   |
| C(36)-O(24)   | 1.242(12) | N(1)-C(56)     | 1.48(2)   |
| C(36)-O(23)   | 1.263(11) | N(1)-C(58)     | 1.54(2)   |
| C(36)-Pr(6)#2 | 3.048(10) | C(55)-O(37)    | 1.11(4)   |
| C(37)-O(25)   | 1.255(12) | C(55)-H(55)    | 0.9300    |
| C(37)-O(26)   | 1.259(12) | C(56)-C(57)    | 1.50(3)   |
| C(37)-C(38)   | 1.487(12) | C(56)-H(56A)   | 0.9700    |
| C(38)-C(39)   | 1.348(13) | C(56)-H(56B)   | 0.9700    |
| C(38)-S(7)    | 1.701(9)  | C(57)-H(57A)   | 0.9600    |
| C(39)-C(40)   | 1.403(13) | C(57)-H(57B)   | 0.9600    |
| C(39)-H(39)   | 0.9300    | C(57)-H(57C)   | 0.9600    |
| C(40)-C(41)   | 1.341(13) | C(58)-C(59)    | 1.62(3)   |
| C(40)-H(40)   | 0.9300    | C(58)-H(58A)   | 0.9700    |
| C(41)-C(42)   | 1.491(13) | C(58)-H(58B)   | 0.9700    |

|               |           |               |           |
|---------------|-----------|---------------|-----------|
| C(41)-S(7)    | 1.702(10) | C(59)-H(59A)  | 0.9600    |
| C(42)-O(27)   | 1.238(12) | C(59)-H(59B)  | 0.9600    |
| C(42)-O(28)   | 1.244(11) | C(59)-H(59C)  | 0.9600    |
| C(43)-O(30)   | 1.249(12) | N(1')-C(55')  | 1.40(2)   |
| C(43)-O(29)   | 1.252(11) | N(1')-C(56')  | 1.44(2)   |
| C(43)-C(44)   | 1.477(12) | N(1')-C(58')  | 1.49(2)   |
| C(43)-Pr(4)   | 3.043(9)  | C(55')-O(37)  | 1.24(4)   |
| C(44)-C(45)   | 1.346(13) | C(55')-H(55') | 0.9300    |
| C(44)-S(8)    | 1.712(8)  | C(56')-C(57') | 1.47(3)   |
| C(45)-C(46)   | 1.413(12) | C(56')-H(56C) | 0.9700    |
| C(45)-H(45)   | 0.9300    | C(56')-H(56D) | 0.9700    |
| C(46)-C(47)   | 1.366(13) | C(57')-H(57D) | 0.9600    |
| C(46)-H(46)   | 0.9300    | C(57')-H(57E) | 0.9600    |
| C(47)-C(48)   | 1.484(13) | C(57')-H(57F) | 0.9600    |
| C(47)-S(8)    | 1.703(9)  | C(58')-C(59') | 1.57(3)   |
| C(48)-O(31)   | 1.222(12) | C(58')-H(58C) | 0.9700    |
| C(48)-O(32)   | 1.261(11) | C(58')-H(58D) | 0.9700    |
| C(49)-O(34)   | 1.253(11) | C(59')-H(59D) | 0.9600    |
| C(49)-O(33)   | 1.262(12) | C(59')-H(59E) | 0.9600    |
| C(49)-C(50)   | 1.494(13) | C(59')-H(59F) | 0.9600    |
| C(50)-C(51)   | 1.342(13) | O(38)-C(60)   | 1.219(13) |
| C(50)-S(9)    | 1.701(9)  | N(2)-C(60)    | 1.349(13) |
| C(51)-C(52)   | 1.413(12) | N(2)-C(63)    | 1.478(18) |
| C(51)-H(51)   | 0.9300    | N(2)-C(61)    | 1.526(17) |
| C(52)-C(53)   | 1.351(13) | C(60)-H(60)   | 0.9300    |
| C(52)-H(52)   | 0.9300    | C(61)-C(62)   | 1.45(2)   |
| C(53)-C(54)   | 1.479(12) | C(61)-H(61A)  | 0.9700    |
| C(53)-S(9)    | 1.705(9)  | C(61)-H(61B)  | 0.9700    |
| C(54)-O(35)   | 1.226(11) | C(62)-H(62A)  | 0.9600    |
| C(54)-O(36)   | 1.264(11) | C(62)-H(62B)  | 0.9600    |
| C(54)-Pr(3)#3 | 3.040(10) | C(62)-H(62C)  | 0.9600    |
| C(75)-H(75)   | 0.9300    | C(63)-C(64)   | 1.49(2)   |
| C(76)-C(77)   | 1.51(3)   | C(63)-H(63A)  | 0.9700    |
| C(76)-H(76A)  | 0.9700    | C(63)-H(63B)  | 0.9700    |
| C(76)-H(76B)  | 0.9700    | C(64)-H(64A)  | 0.9600    |
| C(77)-H(77A)  | 0.9600    | C(64)-H(64B)  | 0.9600    |



|               |           |               |           |
|---------------|-----------|---------------|-----------|
| C(77)-H(77B)  | 0.9600    | C(64)-H(64C)  | 0.9600    |
| C(77)-H(77C)  | 0.9600    | N(3)-C(65)    | 1.37(2)   |
| C(78)-C(79)   | 1.56(3)   | N(3)-C(68)    | 1.47(2)   |
| C(78)-H(78A)  | 0.9700    | N(3)-C(66)    | 1.47(2)   |
| C(78)-H(78B)  | 0.9700    | C(65)-O(39)   | 1.23(2)   |
| C(79)-H(79A)  | 0.9600    | C(65)-H(65)   | 0.9300    |
| C(79)-H(79B)  | 0.9600    | C(66)-C(67)   | 1.53(3)   |
| C(79)-H(79C)  | 0.9600    | C(66)-H(66A)  | 0.9700    |
| N(5')-C(75')  | 1.43(2)   | C(66)-H(66B)  | 0.9700    |
| N(5')-C(76')  | 1.46(2)   | C(67)-H(67A)  | 0.9600    |
| N(5')-C(78')  | 1.51(2)   | C(67)-H(67B)  | 0.9600    |
| C(75')-O(41)  | 1.13(2)   | C(67)-H(67C)  | 0.9600    |
| C(75')-H(75') | 0.9300    | C(68)-C(69)   | 1.50(3)   |
| C(76')-C(77') | 1.51(3)   | C(68)-H(68A)  | 0.9700    |
| C(76')-H(76C) | 0.9700    | C(68)-H(68B)  | 0.9700    |
| C(76')-H(76D) | 0.9700    | C(69)-H(69A)  | 0.9600    |
| C(77')-H(77D) | 0.9600    | C(69)-H(69B)  | 0.9600    |
| C(77')-H(77E) | 0.9600    | C(69)-H(69C)  | 0.9600    |
| C(77')-H(77F) | 0.9600    | N(3')-C(65')  | 1.353(19) |
| C(78')-C(79') | 1.52(3)   | N(3')-C(68')  | 1.471(19) |
| C(78')-H(78C) | 0.9700    | N(3')-C(66')  | 1.48(2)   |
| C(78')-H(78D) | 0.9700    | C(65')-O(39)  | 1.210(17) |
| C(79')-H(79D) | 0.9600    | C(65')-H(65') | 0.9300    |
| C(79')-H(79E) | 0.9600    | C(66')-C(67') | 1.54(2)   |
| C(79')-H(79F) | 0.9600    | C(66')-H(66C) | 0.9700    |
| N(4)-C(70)    | 1.333(12) | C(66')-H(66D) | 0.9700    |
| N(4)-C(71)    | 1.455(15) | C(67')-H(67D) | 0.9600    |
| N(4)-C(73)    | 1.487(17) | C(67')-H(67E) | 0.9600    |
| C(70)-H(70)   | 0.9300    | C(67')-H(67F) | 0.9600    |
| C(71)-C(72)   | 1.491(19) | C(68')-C(69') | 1.54(2)   |
| C(71)-H(71A)  | 0.9700    | C(68')-H(68C) | 0.9700    |
| C(71)-H(71B)  | 0.9700    | C(68')-H(68D) | 0.9700    |
| C(72)-H(72A)  | 0.9600    | C(69')-H(69D) | 0.9600    |
| C(72)-H(72B)  | 0.9600    | C(69')-H(69E) | 0.9600    |
| C(72)-H(72C)  | 0.9600    | C(69')-H(69F) | 0.9600    |
| C(73)-C(74)   | 1.491(19) | O(40)-C(70)   | 1.220(11) |

|                   |           |                   |           |
|-------------------|-----------|-------------------|-----------|
| C(73)-H(73A)      | 0.9700    | N(5)-C(76)        | 1.45(2)   |
| C(73)-H(73B)      | 0.9700    | N(5)-C(75)        | 1.49(2)   |
| C(74)-H(74A)      | 0.9600    | N(5)-C(78)        | 1.50(2)   |
| C(74)-H(74B)      | 0.9600    | C(75)-O(41)       | 1.20(2)   |
| C(74)-H(74C)      | 0.9600    | O(2)-C(1)-O(1)    | 125.9(8)  |
| O(12)-C(18)-C(17) | 116.3(10) | O(2)-C(1)-C(2)    | 115.6(9)  |
| O(11)-C(18)-C(17) | 118.2(9)  | O(1)-C(1)-C(2)    | 118.5(8)  |
| O(14)-C(19)-O(13) | 125.6(9)  | C(3)-C(2)-C(1)    | 127.2(9)  |
| O(14)-C(19)-C(20) | 118.6(9)  | C(3)-C(2)-S(1)    | 110.9(7)  |
| O(13)-C(19)-C(20) | 115.8(10) | C(1)-C(2)-S(1)    | 121.9(7)  |
| C(21)-C(20)-C(19) | 127.2(9)  | C(2)-C(3)-C(4)    | 113.2(9)  |
| C(21)-C(20)-S(4)  | 111.9(7)  | C(2)-C(3)-H(3)    | 123.4     |
| C(19)-C(20)-S(4)  | 120.7(8)  | C(4)-C(3)-H(3)    | 123.4     |
| C(20)-C(21)-C(22) | 113.4(9)  | C(5)-C(4)-C(3)    | 112.4(9)  |
| C(20)-C(21)-H(21) | 123.3     | C(5)-C(4)-H(4)    | 123.8     |
| C(22)-C(21)-H(21) | 123.3     | C(3)-C(4)-H(4)    | 123.8     |
| C(23)-C(22)-C(21) | 111.0(9)  | C(4)-C(5)-C(6)    | 127.9(9)  |
| C(23)-C(22)-H(22) | 124.5     | C(4)-C(5)-S(1)    | 111.7(7)  |
| C(21)-C(22)-H(22) | 124.5     | C(6)-C(5)-S(1)    | 120.4(7)  |
| C(22)-C(23)-C(24) | 128.1(9)  | O(3)-C(6)-O(4)    | 124.0(9)  |
| C(22)-C(23)-S(4)  | 112.3(7)  | O(3)-C(6)-C(5)    | 118.0(8)  |
| C(24)-C(23)-S(4)  | 119.3(7)  | O(4)-C(6)-C(5)    | 117.9(9)  |
| O(16)-C(24)-O(15) | 126.7(9)  | O(6)-C(7)-O(5)    | 122.6(9)  |
| O(16)-C(24)-C(23) | 118.4(9)  | O(6)-C(7)-C(8)    | 117.8(9)  |
| O(15)-C(24)-C(23) | 114.9(9)  | O(5)-C(7)-C(8)    | 119.6(10) |
| O(17)-C(25)-O(18) | 124.9(10) | O(6)-C(7)-Pr(2)   | 54.3(5)   |
| O(17)-C(25)-C(26) | 120.3(9)  | O(5)-C(7)-Pr(2)   | 68.4(5)   |
| O(18)-C(25)-C(26) | 114.8(9)  | C(8)-C(7)-Pr(2)   | 171.0(7)  |
| C(27)-C(26)-C(25) | 125.0(9)  | C(9)-C(8)-C(7)    | 128.6(9)  |
| C(27)-C(26)-S(5)  | 110.5(7)  | C(9)-C(8)-S(2)    | 111.3(7)  |
| C(25)-C(26)-S(5)  | 124.5(8)  | C(7)-C(8)-S(2)    | 120.0(8)  |
| C(26)-C(27)-C(28) | 113.3(9)  | C(8)-C(9)-C(10)   | 112.3(9)  |
| C(26)-C(27)-H(27) | 123.4     | C(8)-C(9)-H(9)    | 123.8     |
| C(28)-C(27)-H(27) | 123.4     | C(10)-C(9)-H(9)   | 123.8     |
| C(29)-C(28)-C(27) | 112.8(9)  | C(11)-C(10)-C(9)  | 112.4(10) |
| C(29)-C(28)-H(28) | 123.6     | C(11)-C(10)-H(10) | 123.8     |

|                     |           |                       |           |
|---------------------|-----------|-----------------------|-----------|
| C(27)-C(28)-H(28)   | 123.6     | C(9)-C(10)-H(10)      | 123.8     |
| C(28)-C(29)-C(30)   | 127.4(9)  | C(10)-C(11)-C(12)     | 126.8(10) |
| C(28)-C(29)-S(5)    | 111.2(7)  | C(10)-C(11)-S(2)      | 112.2(7)  |
| C(30)-C(29)-S(5)    | 121.4(7)  | C(12)-C(11)-S(2)      | 120.9(8)  |
| O(43)-C(30)-O(20)   | 121.3(8)  | O(7)-C(12)-O(8)       | 124.5(9)  |
| O(43)-C(30)-C(29)   | 119.1(8)  | O(7)-C(12)-C(11)      | 116.8(10) |
| O(20)-C(30)-C(29)   | 119.5(9)  | O(8)-C(12)-C(11)      | 118.7(9)  |
| O(43)-C(30)-Pr(5)#1 | 54.3(5)   | O(9)-C(13)-O(10)      | 126.2(9)  |
| O(20)-C(30)-Pr(5)#1 | 67.8(5)   | O(9)-C(13)-C(14)      | 118.1(9)  |
| C(29)-C(30)-Pr(5)#1 | 167.0(7)  | O(10)-C(13)-C(14)     | 115.7(9)  |
| O(22)-C(31)-O(21)   | 127.5(8)  | C(15)-C(14)-C(13)     | 127.5(9)  |
| O(22)-C(31)-C(32)   | 118.2(8)  | C(15)-C(14)-S(3)      | 111.3(7)  |
| O(21)-C(31)-C(32)   | 114.3(9)  | C(13)-C(14)-S(3)      | 121.0(8)  |
| C(33)-C(32)-C(31)   | 127.3(9)  | C(14)-C(15)-C(16)     | 112.5(10) |
| C(33)-C(32)-S(6)    | 112.8(7)  | C(14)-C(15)-H(15)     | 123.8     |
| C(31)-C(32)-S(6)    | 119.8(7)  | C(16)-C(15)-H(15)     | 123.8     |
| C(32)-C(33)-C(34)   | 111.6(9)  | C(17)-C(16)-C(15)     | 113.1(10) |
| C(32)-C(33)-H(33)   | 124.2     | C(17)-C(16)-H(16)     | 123.5     |
| C(34)-C(33)-H(33)   | 124.2     | C(15)-C(16)-H(16)     | 123.5     |
| C(35)-C(34)-C(33)   | 111.9(8)  | C(16)-C(17)-C(18)     | 127.3(10) |
| C(35)-C(34)-H(34)   | 124.1     | C(16)-C(17)-S(3)      | 110.9(8)  |
| C(33)-C(34)-H(34)   | 124.1     | C(18)-C(17)-S(3)      | 121.5(8)  |
| C(34)-C(35)-C(36)   | 127.9(9)  | O(12)-C(18)-O(11)     | 125.4(9)  |
| C(34)-C(35)-S(6)    | 112.6(7)  | (2)-Pr(1)-O(7)#6      | 137.7(3)  |
| C(36)-C(35)-S(6)    | 119.4(8)  | O(2)-Pr(1)-O(3)#10    | 82.2(2)   |
| O(24)-C(36)-O(23)   | 122.3(9)  | O(7)#6-Pr(1)-O(3)#10  | 73.9(2)   |
| O(24)-C(36)-C(35)   | 118.9(9)  | O(2)-Pr(1)-O(37)      | 139.0(3)  |
| O(23)-C(36)-C(35)   | 118.7(10) | O(7)#6-Pr(1)-O(37)    | 78.0(3)   |
| O(24)-C(36)-Pr(6)#2 | 52.6(5)   | O(3)#10-Pr(1)-O(37)   | 136.1(3)  |
| O(23)-C(36)-Pr(6)#2 | 70.5(5)   | O(2)-Pr(1)-O(11)#5    | 81.6(2)   |
| C(35)-C(36)-Pr(6)#2 | 166.9(7)  | O(7)#6-Pr(1)-O(11)#5  | 99.1(3)   |
| O(25)-C(37)-O(26)   | 126.7(9)  | O(3)#10-Pr(1)-O(11)#5 | 145.9(2)  |
| O(25)-C(37)-C(38)   | 116.9(9)  | O(37)-Pr(1)-O(11)#5   | 71.1(3)   |
| O(26)-C(37)-C(38)   | 116.3(9)  | O(2)-Pr(1)-O(5)       | 68.7(2)   |
| C(39)-C(38)-C(37)   | 128.0(9)  | O(7)#6-Pr(1)-O(5)     | 153.5(2)  |
| C(39)-C(38)-S(7)    | 112.0(7)  | O(3)#10-Pr(1)-O(5)    | 115.1(2)  |

|                   |          |                     |           |
|-------------------|----------|---------------------|-----------|
| C(37)-C(38)-S(7)  | 120.0(7) | O(37)-Pr(1)-O(5)    | 79.4(2)   |
| C(38)-C(39)-C(40) | 112.3(9) | O(11)#5-Pr(1)-O(5)  | 86.4(2)   |
| C(38)-C(39)-H(39) | 123.8    | O(2)-Pr(1)-O(9)     | 119.6(2)  |
| C(40)-C(39)-H(39) | 123.8    | O(7)#6-Pr(1)-O(9)   | 86.9(2)   |
| C(41)-C(40)-C(39) | 112.5(9) | O(3)#10-Pr(1)-O(9)  | 74.1(2)   |
| C(41)-C(40)-H(40) | 123.7    | O(37)-Pr(1)-O(9)    | 71.4(3)   |
| C(39)-C(40)-H(40) | 123.7    | O(11)#5-Pr(1)-O(9)  | 139.8(2)  |
| C(40)-C(41)-C(42) | 127.1(9) | O(5)-Pr(1)-O(9)     | 72.89(19) |
| C(40)-C(41)-S(7)  | 112.1(7) | O(2)-Pr(1)-O(44)    | 68.2(2)   |
| C(42)-C(41)-S(7)  | 120.6(7) | O(7)#6-Pr(1)-O(44)  | 71.1(3)   |
| O(27)-C(42)-O(28) | 125.9(9) | O(3)#10-Pr(1)-O(44) | 70.9(2)   |
| O(27)-C(42)-C(41) | 118.4(9) | O(37)-Pr(1)-O(44)   | 129.2(2)  |
| O(28)-C(42)-C(41) | 115.6(9) | O(11)#5-Pr(1)-O(44) | 75.2(3)   |
| O(30)-C(43)-O(29) | 122.9(8) | O(5)-Pr(1)-O(44)    | 135.0(2)  |
| O(30)-C(43)-C(44) | 118.5(8) | O(9)-Pr(1)-O(44)    | 142.6(3)  |
| O(29)-C(43)-C(44) | 118.6(9) | O(13)-Pr(2)-O(4)#10 | 140.6(2)  |
| O(30)-C(43)-Pr(4) | 53.9(4)  | O(13)-Pr(2)-O(10)   | 136.9(2)  |
| O(29)-C(43)-Pr(4) | 69.4(5)  | O(4)#10-Pr(2)-O(10) | 77.1(2)   |
| C(44)-C(43)-Pr(4) | 169.8(7) | O(13)-Pr(2)-O(1)    | 80.0(2)   |
| C(45)-C(44)-C(43) | 127.6(8) | O(4)#10-Pr(2)-O(1)  | 80.3(2)   |
| C(45)-C(44)-S(8)  | 111.8(7) | O(10)-Pr(2)-O(1)    | 138.2(2)  |
| C(43)-C(44)-S(8)  | 120.6(7) | O(13)-Pr(2)-O(17)   | 82.9(2)   |
| C(44)-C(45)-C(46) | 112.9(8) | O(4)#10-Pr(2)-O(17) | 79.2(2)   |
| C(44)-C(45)-H(45) | 123.5    | O(10)-Pr(2)-O(17)   | 87.6(2)   |
| C(46)-C(45)-H(45) | 123.5    | O(1)-Pr(2)-O(17)    | 122.0(2)  |
| C(47)-C(46)-C(45) | 111.9(9) | O(13)-Pr(2)-O(6)    | 78.5(2)   |
| C(47)-C(46)-H(46) | 124.1    | O(4)#10-Pr(2)-O(6)  | 131.8(2)  |
| C(45)-C(46)-H(46) | 124.1    | O(10)-Pr(2)-O(6)    | 86.8(3)   |
| C(46)-C(47)-C(48) | 125.4(9) | O(1)-Pr(2)-O(6)     | 82.6(2)   |
| C(46)-C(47)-S(8)  | 111.8(7) | O(17)-Pr(2)-O(6)    | 145.9(2)  |
| C(48)-C(47)-S(8)  | 122.7(7) | O(13)-Pr(2)-O(19)   | 72.5(2)   |
| O(31)-C(48)-O(32) | 125.6(9) | O(4)#10-Pr(2)-O(19) | 138.5(2)  |
| O(31)-C(48)-C(47) | 120.4(9) | O(10)-Pr(2)-O(19)   | 64.7(2)   |
| O(32)-C(48)-C(47) | 113.9(9) | O(1)-Pr(2)-O(19)    | 139.8(2)  |
| O(34)-C(49)-O(33) | 126.3(9) | O(17)-Pr(2)-O(19)   | 83.4(2)   |
| O(34)-C(49)-C(50) | 116.5(9) | O(6)-Pr(2)-O(19)    | 63.9(2)   |

|                     |          |                     |           |
|---------------------|----------|---------------------|-----------|
| O(33)-C(49)-C(50)   | 117.1(9) | O(13)-Pr(2)-O(5)    | 121.8(2)  |
| C(51)-C(50)-C(49)   | 126.7(9) | O(4)#10-Pr(2)-O(5)  | 82.8(2)   |
| C(51)-C(50)-S(9)    | 112.4(7) | O(10)-Pr(2)-O(5)    | 71.3(2)   |
| C(49)-C(50)-S(9)    | 120.9(7) | O(1)-Pr(2)-O(5)     | 71.3(2)   |
| C(50)-C(51)-C(52)   | 112.5(9) | O(17)-Pr(2)-O(5)    | 154.9(2)  |
| C(50)-C(51)-H(51)   | 123.7    | O(6)-Pr(2)-O(5)     | 49.01(19) |
| C(52)-C(51)-H(51)   | 123.7    | O(19)-Pr(2)-O(5)    | 99.03(18) |
| C(53)-C(52)-C(51)   | 111.7(9) | O(13)-Pr(2)-C(7)    | 99.7(3)   |
| C(53)-C(52)-H(52)   | 124.1    | O(4)#10-Pr(2)-C(7)  | 107.5(3)  |
| C(51)-C(52)-H(52)   | 124.1    | O(10)-Pr(2)-C(7)    | 79.1(3)   |
| C(52)-C(53)-C(54)   | 128.8(8) | O(1)-Pr(2)-C(7)     | 74.7(3)   |
| C(52)-C(53)-S(9)    | 112.4(7) | O(17)-Pr(2)-C(7)    | 163.1(3)  |
| C(54)-C(53)-S(9)    | 118.8(7) | O(6)-Pr(2)-C(7)     | 24.3(2)   |
| O(35)-C(54)-O(36)   | 122.7(9) | O(19)-Pr(2)-C(7)    | 81.5(3)   |
| O(35)-C(54)-C(53)   | 119.1(8) | O(5)-Pr(2)-C(7)     | 24.8(2)   |
| O(36)-C(54)-C(53)   | 118.1(8) | O(18)-Pr(3)-O(29)   | 152.6(2)  |
| O(35)-C(54)-Pr(3)#3 | 54.4(5)  | O(18)-Pr(3)-O(21)   | 134.2(2)  |
| O(36)-C(54)-Pr(3)#3 | 69.1(5)  | O(29)-Pr(3)-O(21)   | 72.9(2)   |
| C(53)-C(54)-Pr(3)#3 | 167.9(7) | O(18)-Pr(3)-O(14)   | 92.8(2)   |
| C(1)-O(1)-Pr(2)     | 128.3(6) | O(29)-Pr(3)-O(14)   | 90.0(2)   |
| C(1)-O(2)-Pr(1)     | 146.2(7) | O(21)-Pr(3)-O(14)   | 76.7(2)   |
| C(6)-O(3)-Pr(1)#4   | 114.7(6) | O(18)-Pr(3)-O(25)   | 85.0(2)   |
| C(6)-O(4)-Pr(2)#4   | 169.5(7) | O(29)-Pr(3)-O(25)   | 76.30(19) |
| C(7)-O(5)-Pr(1)     | 165.6(6) | O(21)-Pr(3)-O(25)   | 129.6(2)  |
| C(7)-O(5)-Pr(2)     | 86.8(6)  | O(14)-Pr(3)-O(25)   | 142.1(2)  |
| Pr(1)-O(5)-Pr(2)    | 107.0(2) | O(18)-Pr(3)-O(38)   | 73.7(3)   |
| C(7)-O(6)-Pr(2)     | 101.4(6) | O(29)-Pr(3)-O(38)   | 81.8(2)   |
| C(12)-O(7)-Pr(1)#5  | 169.6(8) | O(21)-Pr(3)-O(38)   | 137.8(2)  |
| C(12)-O(8)-Pr(5)#2  | 132.4(6) | O(14)-Pr(3)-O(38)   | 70.0(2)   |
| C(13)-O(9)-Pr(1)    | 144.0(6) | O(25)-Pr(3)-O(38)   | 73.1(2)   |
| C(13)-O(10)-Pr(2)   | 133.5(6) | O(18)-Pr(3)-O(35)#7 | 72.2(2)   |
| C(18)-O(11)-Pr(1)#6 | 122.9(6) | O(29)-Pr(3)-O(35)#7 | 122.7(2)  |
| C(18)-O(12)-Pr(5)#7 | 143.7(7) | O(21)-Pr(3)-O(35)#7 | 84.3(2)   |
| C(19)-O(13)-Pr(2)   | 142.7(7) | O(14)-Pr(3)-O(35)#7 | 135.1(2)  |
| C(19)-O(14)-Pr(3)   | 131.3(6) | O(25)-Pr(3)-O(35)#7 | 80.0(2)   |
| C(24)-O(15)-Pr(5)   | 132.0(6) | O(38)-Pr(3)-O(35)#7 | 137.9(2)  |

|                       |            |                         |           |
|-----------------------|------------|-------------------------|-----------|
| C(24)-O(16)-Pr(6)     | 139.5(6)   | O(18)-Pr(3)-O(19)       | 67.5(2)   |
| C(25)-O(17)-Pr(2)     | 127.8(7)   | O(29)-Pr(3)-O(19)       | 138.4(2)  |
| C(25)-O(18)-Pr(3)     | 170.7(8)   | O(21)-Pr(3)-O(19)       | 67.0(2)   |
| Pr(3)-O(19)-Pr(2)     | 122.69(18) | O(14)-Pr(3)-O(19)       | 70.8(2)   |
| Pr(3)-O(19)-H(19A)    | 95(6)      | O(25)-Pr(3)-O(19)       | 139.8(2)  |
| Pr(2)-O(19)-H(19A)    | 106(7)     | O(38)-Pr(3)-O(19)       | 122.1(2)  |
| Pr(3)-O(19)-H(19B)    | 119(7)     | O(35)#7-Pr(3)-O(19)     | 64.3(2)   |
| Pr(2)-O(19)-H(19B)    | 103(7)     | O(18)-Pr(3)-O(36)#7     | 114.6(2)  |
| H(19A)-O(19)-H(19B)   | 110(4)     | O(29)-Pr(3)-O(36)#7     | 75.20(18) |
| C(30)-O(20)-Pr(6)#1   | 168.7(6)   | O(21)-Pr(3)-O(36)#7     | 69.44(19) |
| C(30)-O(20)-Pr(5)#1   | 87.6(5)    | O(14)-Pr(3)-O(36)#7     | 145.7(2)  |
| Pr(6)#1-O(20)-Pr(5)#1 | 103.75(19) | O(25)-Pr(3)-O(36)#7     | 64.7(2)   |
| C(31)-O(21)-Pr(3)     | 136.2(6)   | O(38)-Pr(3)-O(36)#7     | 135.4(2)  |
| C(31)-O(22)-Pr(4)     | 135.5(6)   | O(35)#7-Pr(3)-O(36)#7   | 47.53(18) |
| C(36)-O(23)-Pr(5)#2   | 167.4(6)   | O(19)-Pr(3)-O(36)#7     | 99.91(17) |
| C(36)-O(23)-Pr(6)#2   | 85.1(6)    | O(18)-Pr(3)-C(54)#7     | 91.9(3)   |
| Pr(5)#2-O(23)-Pr(6)#2 | 103.5(2)   | O(29)-Pr(3)-C(54)#7     | 99.7(2)   |
| C(36)-O(24)-Pr(6)#2   | 104.1(6)   | O(21)-Pr(3)-C(54)#7     | 78.0(2)   |
| C(37)-O(25)-Pr(3)     | 137.1(6)   | O(14)-Pr(3)-C(54)#7     | 148.8(2)  |
| C(37)-O(26)-Pr(4)     | 134.1(6)   | O(25)-Pr(3)-C(54)#7     | 69.0(2)   |
| C(42)-O(27)-Pr(6)#1   | 133.5(6)   | O(38)-Pr(3)-C(54)#7     | 140.5(2)  |
| C(42)-O(28)-Pr(4)#8   | 146.4(7)   | O(35)#7-Pr(3)-C(54)#7   | 23.2(2)   |
| C(43)-O(29)-Pr(3)     | 169.2(6)   | O(19)-Pr(3)-C(54)#7     | 82.7(2)   |
| C(43)-O(29)-Pr(4)     | 86.4(5)    | O(36)#7-Pr(3)-C(54)#7   | 24.5(2)   |
| Pr(3)-O(29)-Pr(4)     | 104.19(19) | O(28)#11-Pr(4)-O(36)#7  | 156.3(2)  |
| C(43)-O(30)-Pr(4)     | 102.4(5)   | O(28)#11-Pr(4)-O(26)    | 126.7(2)  |
| C(48)-O(31)-Pr(4)#9   | 134.0(6)   | O(36)#7-Pr(4)-O(26)     | 75.0(2)   |
| C(48)-O(32)-Pr(6)     | 163.1(7)   | O(28)#11-Pr(4)-O(31)#12 | 85.7(2)   |
| C(49)-O(33)-Pr(5)     | 134.9(6)   | O(36)#7-Pr(4)-O(31)#12  | 90.1(2)   |
| C(49)-O(34)-Pr(6)     | 138.3(6)   | O(26)-Pr(4)-O(31)#12    | 79.3(2)   |
| C(54)-O(35)-Pr(3)#3   | 102.4(6)   | O(28)#11-Pr(4)-O(22)    | 88.4(2)   |
| C(54)-O(36)-Pr(4)#3   | 168.3(6)   | O(36)#7-Pr(4)-O(22)     | 80.80(19) |
| C(54)-O(36)-Pr(3)#3   | 86.4(5)    | O(26)-Pr(4)-O(22)       | 131.6(2)  |
| Pr(4)#3-O(36)-Pr(3)#3 | 105.2(2)   | O(31)#12-Pr(4)-O(22)    | 142.5(2)  |
| Pr(6)-O(42)-H(42B)    | 107(8)     | O(28)#11-Pr(4)-O(39)    | 79.0(2)   |
| Pr(6)-O(42)-H(42A)    | 113(8)     | O(36)#7-Pr(4)-O(39)     | 77.6(2)   |

|                         |            |                        |            |
|-------------------------|------------|------------------------|------------|
| H(42B)-O(42)-H(42A)     | 108(5)     | O(26)-Pr(4)-O(39)      | 138.9(2)   |
| C(30)-O(43)-Pr(5)#1     | 102.0(5)   | O(31)#12-Pr(4)-O(39)   | 70.6(2)    |
| Pr(1)-O(44)-H(44A)      | 128(7)     | O(22)-Pr(4)-O(39)      | 71.9(2)    |
| Pr(1)-O(44)-H(44B)      | 112(6)     | O(28)#11-Pr(4)-O(30)   | 74.6(2)    |
| H(44A)-O(44)-H(44B)     | 106(4)     | O(36)#7-Pr(4)-O(30)    | 123.1(2)   |
| C(5)-S(1)-C(2)          | 91.8(4)    | O(26)-Pr(4)-O(30)      | 80.2(2)    |
| C(11)-S(2)-C(8)         | 91.6(5)    | O(31)#12-Pr(4)-O(30)   | 134.1(2)   |
| C(14)-S(3)-C(17)        | 92.2(5)    | O(22)-Pr(4)-O(30)      | 79.0(2)    |
| C(20)-S(4)-C(23)        | 91.3(5)    | O(39)-Pr(4)-O(30)      | 141.0(2)   |
| C(29)-S(5)-C(26)        | 92.2(5)    | O(28)#11-Pr(4)-O(29)   | 119.17(19) |
| C(35)-S(6)-C(32)        | 91.0(5)    | O(36)#7-Pr(4)-O(29)    | 75.41(18)  |
| C(38)-S(7)-C(41)        | 91.1(4)    | O(26)-Pr(4)-O(29)      | 67.63(19)  |
| C(47)-S(8)-C(44)        | 91.5(5)    | O(31)#12-Pr(4)-O(29)   | 146.2(2)   |
| C(50)-S(9)-C(53)        | 90.9(5)    | O(22)-Pr(4)-O(29)      | 65.95(19)  |
| O(12)#3-Pr(5)-O(8)#13   | 81.7(2)    | O(39)-Pr(4)-O(29)      | 132.7(2)   |
| O(23)#13-Pr(5)-O(8)#13  | 89.1(2)    | O(30)-Pr(4)-O(29)      | 47.78(18)  |
| O(33)-Pr(5)-O(8)#13     | 144.1(2)   | O(28)#11-Pr(4)-C(43)   | 96.1(2)    |
| O(15)-Pr(5)-O(8)#13     | 75.2(2)    | O(36)#7-Pr(4)-C(43)    | 99.7(2)    |
| O(12)#3-Pr(5)-O(41)     | 79.0(3)    | O(26)-Pr(4)-C(43)      | 74.1(2)    |
| O(23)#13-Pr(5)-O(41)    | 87.1(3)    | O(31)#12-Pr(4)-C(43)   | 148.1(2)   |
| O(33)-Pr(5)-O(41)       | 72.6(3)    | O(22)-Pr(4)-C(43)      | 69.4(2)    |
| O(15)-Pr(5)-O(41)       | 143.9(4)   | O(39)-Pr(4)-C(43)      | 141.2(2)   |
| O(8)#13-Pr(5)-O(41)     | 72.4(3)    | O(30)-Pr(4)-C(43)      | 23.6(2)    |
| O(12)#3-Pr(5)-O(43)#14  | 69.2(2)    | O(29)-Pr(4)-C(43)      | 24.2(2)    |
| O(23)#13-Pr(5)-O(43)#14 | 125.5(2)   | O(12)#3-Pr(5)-O(23)#13 | 165.1(2)   |
| O(33)-Pr(5)-O(43)#14    | 82.4(2)    | O(12)#3-Pr(5)-O(33)    | 99.3(2)    |
| O(15)-Pr(5)-O(43)#14    | 78.7(2)    | O(23)#13-Pr(5)-O(33)   | 81.3(2)    |
| O(8)#13-Pr(5)-O(43)#14  | 129.7(2)   | O(12)#3-Pr(5)-O(15)    | 111.7(2)   |
| O(41)-Pr(5)-O(43)#14    | 135.4(4)   | O(23)#13-Pr(5)-O(15)   | 76.8(2)    |
| O(12)#3-Pr(5)-O(20)#14  | 116.56(19) | O(33)-Pr(5)-O(15)      | 134.5(2)   |
| O(23)#13-Pr(5)-O(20)#14 | 77.57(19)  | H(56A)-C(56)-H(56B)    | 107.9      |
| O(33)-Pr(5)-O(20)#14    | 66.9(2)    | C(56)-C(57)-H(57A)     | 109.5      |
| O(15)-Pr(5)-O(20)#14    | 69.56(19)  | C(56)-C(57)-H(57B)     | 109.5      |
| O(8)#13-Pr(5)-O(20)#14  | 144.3(2)   | H(57A)-C(57)-H(57B)    | 109.5      |
| O(41)-Pr(5)-O(20)#14    | 138.3(2)   | C(56)-C(57)-H(57C)     | 109.5      |
| O(43)#14-Pr(5)-O(20)#14 | 48.23(18)  | H(57A)-C(57)-H(57C)    | 109.5      |



|                         |           |                      |        |
|-------------------------|-----------|----------------------|--------|
| O(12)#3-Pr(5)-C(30)#14  | 92.0(2)   | H(57B)-C(57)-H(57C)  | 109.5  |
| O(23)#13-Pr(5)-C(30)#14 | 102.3(2)  | N(1)-C(58)-C(59)     | 102(2) |
| O(33)-Pr(5)-C(30)#14    | 71.4(2)   | N(1)-C(58)-H(58A)    | 111.4  |
| O(15)-Pr(5)-C(30)#14    | 74.8(2)   | C(59)-C(58)-H(58A)   | 111.4  |
| O(8)#13-Pr(5)-C(30)#14  | 144.5(2)  | N(1)-C(58)-H(58B)    | 111.4  |
| O(41)-Pr(5)-C(30)#14    | 140.8(4)  | C(59)-C(58)-H(58B)   | 111.4  |
| O(43)#14-Pr(5)-C(30)#14 | 23.7(2)   | H(58A)-C(58)-H(58B)  | 109.2  |
| O(20)#14-Pr(5)-C(30)#14 | 24.7(2)   | C(58)-C(59)-H(59A)   | 109.5  |
| O(32)-Pr(6)-O(34)       | 138.3(2)  | C(58)-C(59)-H(59B)   | 109.5  |
| O(32)-Pr(6)-O(20)#14    | 149.4(2)  | H(59A)-C(59)-H(59B)  | 109.5  |
| O(34)-Pr(6)-O(20)#14    | 71.4(2)   | C(58)-C(59)-H(59C)   | 109.5  |
| O(32)-Pr(6)-O(27)#14    | 90.5(2)   | H(59A)-C(59)-H(59C)  | 109.5  |
| O(34)-Pr(6)-O(27)#14    | 77.6(2)   | H(59B)-C(59)-H(59C)  | 109.5  |
| O(20)#14-Pr(6)-O(27)#14 | 90.5(2)   | C(55')-N(1')-C(56')  | 122(2) |
| O(32)-Pr(6)-O(40)       | 75.4(2)   | C(55')-N(1')-C(58')  | 117(2) |
| O(34)-Pr(6)-O(40)       | 133.9(2)  | C(56')-N(1')-C(58')  | 117(3) |
| O(20)#14-Pr(6)-O(40)    | 76.1(2)   | O(37)-C(55')-N(1')   | 115(3) |
| O(27)#14-Pr(6)-O(40)    | 70.9(2)   | O(37)-C(55')-H(55')  | 122.5  |
| O(32)-Pr(6)-O(24)#13    | 73.3(2)   | N(1')-C(55')-H(55')  | 122.5  |
| O(34)-Pr(6)-O(24)#13    | 89.7(2)   | N(1')-C(56')-C(57')  | 116(3) |
| O(20)#14-Pr(6)-O(24)#13 | 122.5(2)  | N(1')-C(56')-H(56C)  | 108.3  |
| O(27)#14-Pr(6)-O(24)#13 | 138.9(2)  | C(57')-C(56')-H(56C) | 108.3  |
| O(40)-Pr(6)-O(24)#13    | 135.8(2)  | N(1')-C(56')-H(56D)  | 108.3  |
| O(32)-Pr(6)-O(16)       | 84.5(2)   | C(57')-C(56')-H(56D) | 108.3  |
| O(34)-Pr(6)-O(16)       | 128.2(2)  | H(56C)-C(56')-H(56D) | 107.4  |
| O(20)#14-Pr(6)-O(16)    | 76.20(19) | C(56')-C(57')-H(57D) | 109.5  |
| O(27)#14-Pr(6)-O(16)    | 142.2(2)  | C(56')-C(57')-H(57E) | 109.5  |
| O(40)-Pr(6)-O(16)       | 71.6(2)   | H(57D)-C(57')-H(57E) | 109.5  |
| O(24)#13-Pr(6)-O(16)    | 74.9(2)   | C(56')-C(57')-H(57F) | 109.5  |
| O(32)-Pr(6)-O(42)       | 69.1(3)   | H(57D)-C(57')-H(57F) | 109.5  |
| O(34)-Pr(6)-O(42)       | 69.3(2)   | H(57E)-C(57')-H(57F) | 109.5  |
| O(20)#14-Pr(6)-O(42)    | 139.1(2)  | N(1')-C(58')-C(59')  | 107(2) |
| O(27)#14-Pr(6)-O(42)    | 70.6(2)   | N(1')-C(58')-H(58C)  | 110.3  |
| O(40)-Pr(6)-O(42)       | 126.4(2)  | C(59')-C(58')-H(58C) | 110.3  |
| O(24)#13-Pr(6)-O(42)    | 68.3(3)   | N(1')-C(58')-H(58D)  | 110.3  |
| O(16)-Pr(6)-O(42)       | 139.4(2)  | C(59')-C(58')-H(58D) | 110.3  |

|                         |           |                      |           |
|-------------------------|-----------|----------------------|-----------|
| O(32)-Pr(6)-O(23)#13    | 117.0(2)  | H(58C)-C(58')-H(58D) | 108.6     |
| O(34)-Pr(6)-O(23)#13    | 69.5(2)   | C(58')-C(59')-H(59D) | 109.5     |
| O(20)#14-Pr(6)-O(23)#13 | 75.19(18) | C(58')-C(59')-H(59E) | 109.5     |
| O(27)#14-Pr(6)-O(23)#13 | 146.8(2)  | H(59D)-C(59')-H(59E) | 109.5     |
| O(40)-Pr(6)-O(23)#13    | 131.2(2)  | C(58')-C(59')-H(59F) | 109.5     |
| O(24)#13-Pr(6)-O(23)#13 | 47.5(2)   | H(59D)-C(59')-H(59F) | 109.5     |
| O(16)-Pr(6)-O(23)#13    | 63.78(19) | H(59E)-C(59')-H(59F) | 109.5     |
| O(42)-Pr(6)-O(23)#13    | 100.8(2)  | C(60)-O(38)-Pr(3)    | 128.3(7)  |
| O(32)-Pr(6)-C(36)#13    | 93.9(3)   | C(60)-N(2)-C(63)     | 120.4(13) |
| O(34)-Pr(6)-C(36)#13    | 81.1(2)   | C(60)-N(2)-C(61)     | 116.5(15) |
| O(20)#14-Pr(6)-C(36)#13 | 99.2(2)   | C(63)-N(2)-C(61)     | 121.3(13) |
| O(27)#14-Pr(6)-C(36)#13 | 152.3(3)  | O(38)-C(60)-N(2)     | 123.3(12) |
| O(40)-Pr(6)-C(36)#13    | 136.5(2)  | O(38)-C(60)-H(60)    | 118.3     |
| O(24)#13-Pr(6)-C(36)#13 | 23.3(2)   | N(2)-C(60)-H(60)     | 118.3     |
| O(16)-Pr(6)-C(36)#13    | 65.4(2)   | C(62)-C(61)-N(2)     | 111.9(18) |
| O(42)-Pr(6)-C(36)#13    | 85.5(3)   | C(62)-C(61)-H(61A)   | 109.2     |
| O(23)#13-Pr(6)-C(36)#13 | 24.4(2)   | N(2)-C(61)-H(61A)    | 109.2     |
| C(55)-N(1)-C(56)        | 118(2)    | C(62)-C(61)-H(61B)   | 109.2     |
| C(55)-N(1)-C(58)        | 114(2)    | N(2)-C(61)-H(61B)    | 109.2     |
| C(56)-N(1)-C(58)        | 127(3)    | H(61A)-C(61)-H(61B)  | 107.9     |
| O(37)-C(55)-N(1)        | 129(4)    | C(61)-C(62)-H(62A)   | 109.5     |
| O(37)-C(55)-H(55)       | 115.5     | C(61)-C(62)-H(62B)   | 109.5     |
| N(1)-C(55)-H(55)        | 115.5     | H(62A)-C(62)-H(62B)  | 109.5     |
| N(1)-C(56)-C(57)        | 112(2)    | C(61)-C(62)-H(62C)   | 109.5     |
| N(1)-C(56)-H(56A)       | 109.3     | H(62A)-C(62)-H(62C)  | 109.5     |
| C(57)-C(56)-H(56A)      | 109.3     | H(62B)-C(62)-H(62C)  | 109.5     |
| N(1)-C(56)-H(56B)       | 109.3     | N(2)-C(63)-C(64)     | 108.7(17) |
| C(57)-C(56)-H(56B)      | 109.3     | N(2)-C(63)-H(63A)    | 110.0     |
| N(3)-C(66)-H(66A)       | 109.6     | C(64)-C(63)-H(63A)   | 110.0     |
| C(67)-C(66)-H(66A)      | 109.6     | N(2)-C(63)-H(63B)    | 110.0     |
| N(3)-C(66)-H(66B)       | 109.6     | C(64)-C(63)-H(63B)   | 110.0     |
| C(67)-C(66)-H(66B)      | 109.6     | H(63A)-C(63)-H(63B)  | 108.3     |
| H(66A)-C(66)-H(66B)     | 108.1     | C(63)-C(64)-H(64A)   | 109.5     |
| C(66)-C(67)-H(67A)      | 109.5     | C(63)-C(64)-H(64B)   | 109.5     |
| C(66)-C(67)-H(67B)      | 109.5     | H(64A)-C(64)-H(64B)  | 109.5     |
| H(67A)-C(67)-H(67B)     | 109.5     | C(63)-C(64)-H(64C)   | 109.5     |

|                     |           |                      |           |
|---------------------|-----------|----------------------|-----------|
| C(66)-C(67)-H(67C)  | 109.5     | H(64A)-C(64)-H(64C)  | 109.5     |
| H(67A)-C(67)-H(67C) | 109.5     | H(64B)-C(64)-H(64C)  | 109.5     |
| H(67B)-C(67)-H(67C) | 109.5     | C(65)-N(3)-C(68)     | 120.6(18) |
| N(3)-C(68)-C(69)    | 114(2)    | C(65)-N(3)-C(66)     | 118(2)    |
| N(3)-C(68)-H(68A)   | 108.9     | C(68)-N(3)-C(66)     | 121(2)    |
| C(69)-C(68)-H(68A)  | 108.9     | O(39)-C(65)-N(3)     | 125(3)    |
| N(3)-C(68)-H(68B)   | 108.8     | O(39)-C(65)-H(65)    | 117.3     |
| C(69)-C(68)-H(68B)  | 108.8     | N(3)-C(65)-H(65)     | 117.3     |
| H(68A)-C(68)-H(68B) | 107.7     | N(3)-C(66)-C(67)     | 110(2)    |
| C(68)-C(69)-H(69A)  | 109.5     | N(3')-C(65')-H(65')  | 119.6     |
| C(68)-C(69)-H(69B)  | 109.5     | N(3')-C(66')-C(67')  | 108.7(17) |
| H(69A)-C(69)-H(69B) | 109.5     | N(3')-C(66')-H(66C)  | 109.9     |
| C(68)-C(69)-H(69C)  | 109.5     | C(67')-C(66')-H(66C) | 109.9     |
| H(69A)-C(69)-H(69C) | 109.5     | N(3')-C(66')-H(66D)  | 109.9     |
| H(69B)-C(69)-H(69C) | 109.5     | C(67')-C(66')-H(66D) | 109.9     |
| C(65')-N(3')-C(68') | 120.0(16) | H(66C)-C(66')-H(66D) | 108.3     |
| C(65')-N(3')-C(66') | 118.6(15) | C(66')-C(67')-H(67D) | 109.5     |
| C(68')-N(3')-C(66') | 121.1(17) | C(66')-C(67')-H(67E) | 109.5     |
| O(39)-C(65')-N(3')  | 120.7(19) | H(67D)-C(67')-H(67E) | 109.5     |
| O(39)-C(65')-H(65') | 119.7     | C(66')-C(67')-H(67F) | 109.5     |
| C(76)-N(5)-C(78)    | 120(3)    | H(67D)-C(67')-H(67F) | 109.5     |
| C(75)-N(5)-C(78)    | 115(2)    | H(67E)-C(67')-H(67F) | 109.5     |
| O(41)-C(75)-N(5)    | 117(3)    | N(3')-C(68')-C(69')  | 110.3(18) |
| O(41)-C(75)-H(75)   | 121.7     | N(3')-C(68')-H(68C)  | 109.6     |
| N(5)-C(75)-H(75)    | 121.7     | C(69')-C(68')-H(68C) | 109.6     |
| N(5)-C(76)-C(77)    | 122(4)    | N(3')-C(68')-H(68D)  | 109.6     |
| N(5)-C(76)-H(76A)   | 106.8     | C(69')-C(68')-H(68D) | 109.6     |
| C(77)-C(76)-H(76A)  | 106.8     | H(68C)-C(68')-H(68D) | 108.1     |
| N(5)-C(76)-H(76B)   | 106.8     | C(68')-C(69')-H(69D) | 109.5     |
| C(77)-C(76)-H(76B)  | 106.8     | C(68')-C(69')-H(69E) | 109.5     |
| H(76A)-C(76)-H(76B) | 106.6     | H(69D)-C(69')-H(69E) | 109.5     |
| C(76)-C(77)-H(77A)  | 109.5     | C(68')-C(69')-H(69F) | 109.5     |
| C(76)-C(77)-H(77B)  | 109.4     | H(69D)-C(69')-H(69F) | 109.5     |
| H(77A)-C(77)-H(77B) | 109.5     | H(69E)-C(69')-H(69F) | 109.5     |
| C(76)-C(77)-H(77C)  | 109.5     | C(70)-O(40)-Pr(6)    | 126.8(7)  |
| H(77A)-C(77)-H(77C) | 109.5     | C(70)-N(4)-C(71)     | 123.8(13) |

|                      |        |                      |           |
|----------------------|--------|----------------------|-----------|
| H(77B)-C(77)-H(77C)  | 109.5  | C(70)-N(4)-C(73)     | 119.5(11) |
| N(5)-C(78)-C(79)     | 96(3)  | C(71)-N(4)-C(73)     | 116.7(12) |
| N(5)-C(78)-H(78A)    | 112.6  | O(40)-C(70)-N(4)     | 123.7(11) |
| C(79)-C(78)-H(78A)   | 112.6  | O(40)-C(70)-H(70)    | 118.1     |
| N(5)-C(78)-H(78B)    | 112.6  | N(4)-C(70)-H(70)     | 118.1     |
| C(79)-C(78)-H(78B)   | 112.6  | N(4)-C(71)-C(72)     | 113.7(14) |
| H(78A)-C(78)-H(78B)  | 110.1  | N(4)-C(71)-H(71A)    | 108.8     |
| C(78)-C(79)-H(79A)   | 109.5  | C(72)-C(71)-H(71A)   | 108.8     |
| C(78)-C(79)-H(79B)   | 109.5  | N(4)-C(71)-H(71B)    | 108.8     |
| H(79A)-C(79)-H(79B)  | 109.5  | C(72)-C(71)-H(71B)   | 108.8     |
| C(78)-C(79)-H(79C)   | 109.5  | H(71A)-C(71)-H(71B)  | 107.7     |
| H(79A)-C(79)-H(79C)  | 109.5  | C(71)-C(72)-H(72A)   | 109.5     |
| H(79B)-C(79)-H(79C)  | 109.5  | C(71)-C(72)-H(72B)   | 109.5     |
| C(75')-N(5')-C(76')  | 121(2) | H(72A)-C(72)-H(72B)  | 109.5     |
| C(75')-N(5')-C(78')  | 116(2) | C(71)-C(72)-H(72C)   | 109.5     |
| C(76')-N(5')-C(78')  | 120(3) | H(72A)-C(72)-H(72C)  | 109.5     |
| O(41)-C(75')-N(5')   | 127(3) | H(72B)-C(72)-H(72C)  | 109.5     |
| O(41)-C(75')-H(75')  | 116.7  | N(4)-C(73)-C(74)     | 107.9(15) |
| N(5')-C(75')-H(75')  | 116.8  | N(4)-C(73)-H(73A)    | 110.1     |
| N(5')-C(76')-C(77')  | 121(3) | C(74)-C(73)-H(73A)   | 110.1     |
| N(5')-C(76')-H(76C)  | 107.1  | N(4)-C(73)-H(73B)    | 110.1     |
| C(77')-C(76')-H(76C) | 107.2  | C(74)-C(73)-H(73B)   | 110.1     |
| N(5')-C(76')-H(76D)  | 107.2  | H(73A)-C(73)-H(73B)  | 108.4     |
| C(77')-C(76')-H(76D) | 107.2  | C(73)-C(74)-H(74A)   | 109.5     |
| H(76C)-C(76')-H(76D) | 106.8  | C(73)-C(74)-H(74B)   | 109.5     |
| C(76')-C(77')-H(77D) | 109.5  | H(74A)-C(74)-H(74B)  | 109.5     |
| C(76')-C(77')-H(77E) | 109.5  | C(73)-C(74)-H(74C)   | 109.5     |
| H(77D)-C(77')-H(77E) | 109.5  | H(74A)-C(74)-H(74C)  | 109.5     |
| C(76')-C(77')-H(77F) | 109.5  | H(74B)-C(74)-H(74C)  | 109.5     |
| H(77D)-C(77')-H(77F) | 109.5  | C(76)-N(5)-C(75)     | 117(2)    |
| H(77E)-C(77')-H(77F) | 109.5  | H(79D)-C(79')-H(79F) | 109.5     |
| N(5')-C(78')-C(79')  | 98(3)  | H(79E)-C(79')-H(79F) | 109.5     |
| N(5')-C(78')-H(78C)  | 112.2  | C(55)-O(37)-Pr(1)    | 130(2)    |
| C(79')-C(78')-H(78C) | 112.2  | C(55')-O(37)-Pr(1)   | 129.9(19) |
| N(5')-C(78')-H(78D)  | 112.2  | C(65')-O(39)-Pr(4)   | 128.5(12) |
| C(79')-C(78')-H(78D) | 112.2  | C(65)-O(39)-Pr(4)    | 123.5(19) |

|                      |       |                      |           |
|----------------------|-------|----------------------|-----------|
| H(78C)-C(78')-H(78D) | 109.8 | C(75')-O(41)-Pr(5)   | 126.8(18) |
| C(78')-C(79')-H(79D) | 109.5 | C(75)-O(41)-Pr(5)    | 146(2)    |
| C(78')-C(79')-H(79E) | 109.5 | C(78')-C(79')-H(79F) | 109.5     |
| H(79D)-C(79')-H(79E) | 109.5 |                      |           |

Symmetry transformations used to generate equivalent atoms:

#1 x,y,z-1 #2 x,y-1,z #3 x,y+1,z+1 #4 -x-2,-y-1,z+1/2 #5 -x-2,-y-2,z+1/2 #6 -x-2,-y-2,z-1/2 #7 x,y-1,z-1 #8 -x-5/2,y+1/2,z-1/2 #9 -x-5/2,y+1/2,z+1/2 #10 -x-2,-y-1,z-1/2 #11 -x-5/2,y-1/2,z+1/2 #12 -x-5/2,y-1/2,z-1/2 #13 x,y+1,z #14 x,y,z+1

### 3

|             |           |               |           |
|-------------|-----------|---------------|-----------|
| C(1)-O(2)   | 1.236(12) | C(30)-O(43)   | 1.268(13) |
| C(1)-O(1)   | 1.266(13) | C(30)-Nd(5)#1 | 3.032(10) |
| C(1)-C(2)   | 1.480(13) | C(31)-O(21)   | 1.242(12) |
| C(2)-C(3)   | 1.346(14) | C(31)-O(22)   | 1.259(13) |
| C(2)-S(1)   | 1.702(10) | C(31)-C(32)   | 1.494(13) |
| C(3)-C(4)   | 1.412(14) | C(32)-C(33)   | 1.363(14) |
| C(3)-H(3)   | 0.9300    | C(32)-S(6)    | 1.704(10) |
| C(4)-C(5)   | 1.341(15) | C(33)-C(34)   | 1.423(13) |
| C(4)-H(4)   | 0.9300    | C(33)-H(33)   | 0.9300    |
| C(5)-C(6)   | 1.473(14) | C(34)-C(35)   | 1.344(14) |
| C(5)-S(1)   | 1.692(10) | C(34)-H(34)   | 0.9300    |
| C(6)-O(3)   | 1.243(13) | C(35)-C(36)   | 1.473(14) |
| C(6)-O(4)   | 1.256(12) | C(35)-S(6)    | 1.707(10) |
| C(7)-O(5)   | 1.244(12) | C(36)-O(24)   | 1.240(13) |
| C(7)-O(6)   | 1.250(13) | C(36)-O(23)   | 1.272(12) |
| C(7)-C(8)   | 1.491(14) | C(36)-Nd(6)#2 | 3.041(11) |
| C(7)-Nd(2)  | 2.964(10) | C(37)-O(26)   | 1.248(13) |
| C(8)-C(9)   | 1.344(15) | C(37)-O(25)   | 1.265(13) |
| C(8)-S(2)   | 1.712(10) | C(37)-C(38)   | 1.480(13) |
| C(9)-C(10)  | 1.407(14) | C(38)-C(39)   | 1.359(14) |
| C(9)-H(9)   | 0.9300    | C(38)-S(7)    | 1.706(10) |
| C(10)-C(11) | 1.353(16) | C(39)-C(40)   | 1.411(14) |

|             |           |               |           |
|-------------|-----------|---------------|-----------|
| C(10)-H(10) | 0.9300    | C(39)-H(39)   | 0.9300    |
| C(11)-C(12) | 1.485(13) | C(40)-C(41)   | 1.341(15) |
| C(11)-S(2)  | 1.694(11) | C(40)-H(40)   | 0.9300    |
| C(12)-O(7)  | 1.234(12) | C(41)-C(42)   | 1.498(14) |
| C(12)-O(8)  | 1.248(13) | C(41)-S(7)    | 1.701(11) |
| C(13)-O(9)  | 1.247(13) | C(42)-O(27)   | 1.230(13) |
| C(13)-O(10) | 1.264(13) | C(42)-O(28)   | 1.259(12) |
| C(13)-C(14) | 1.465(14) | C(43)-O(30)   | 1.250(13) |
| C(14)-C(15) | 1.342(15) | C(43)-O(29)   | 1.267(12) |
| C(14)-S(3)  | 1.698(10) | C(43)-C(44)   | 1.468(13) |
| C(15)-C(16) | 1.394(14) | C(43)-Nd(4)   | 3.040(10) |
| C(15)-H(15) | 0.9300    | C(44)-C(45)   | 1.347(14) |
| C(16)-C(17) | 1.355(16) | C(44)-S(8)    | 1.709(10) |
| C(16)-H(16) | 0.9300    | C(45)-C(46)   | 1.403(13) |
| C(17)-C(18) | 1.490(14) | C(45)-H(45)   | 0.9300    |
| C(17)-S(3)  | 1.688(11) | C(46)-C(47)   | 1.349(14) |
| C(18)-O(11) | 1.255(14) | C(46)-H(46)   | 0.9300    |
| C(18)-O(12) | 1.255(14) | C(47)-C(48)   | 1.495(14) |
| C(19)-O(14) | 1.241(14) | C(47)-S(8)    | 1.703(10) |
| C(19)-O(13) | 1.245(14) | C(48)-O(31)   | 1.216(13) |
| C(19)-C(20) | 1.499(15) | C(48)-O(32)   | 1.267(13) |
| C(20)-C(21) | 1.338(15) | C(49)-O(33)   | 1.247(13) |
| C(20)-S(4)  | 1.711(11) | C(49)-O(34)   | 1.262(13) |
| C(21)-C(22) | 1.409(13) | C(49)-C(50)   | 1.510(13) |
| C(21)-H(21) | 0.9300    | C(50)-C(51)   | 1.356(14) |
| C(22)-C(23) | 1.346(14) | C(50)-S(9)    | 1.697(10) |
| C(22)-H(22) | 0.9300    | C(51)-C(52)   | 1.395(13) |
| C(23)-C(24) | 1.500(14) | C(51)-H(51)   | 0.9300    |
| C(23)-S(4)  | 1.712(10) | C(52)-C(53)   | 1.368(14) |
| C(24)-O(16) | 1.231(14) | C(52)-H(52)   | 0.9300    |
| C(24)-O(15) | 1.289(13) | C(53)-C(54)   | 1.472(14) |
| C(25)-O(18) | 1.241(13) | C(53)-S(9)    | 1.700(10) |
| C(25)-O(17) | 1.261(13) | C(54)-O(36)   | 1.243(12) |
| C(25)-C(26) | 1.478(15) | C(54)-O(35)   | 1.252(13) |
| C(26)-C(27) | 1.346(15) | C(54)-Nd(3)#3 | 3.027(11) |
| C(26)-S(5)  | 1.715(11) | O(1)-Nd(2)    | 2.416(6)  |

|               |           |               |           |
|---------------|-----------|---------------|-----------|
| C(27)-C(28)   | 1.401(13) | O(2)-Nd(1)    | 2.367(6)  |
| C(27)-H(27)   | 0.9300    | O(3)-Nd(1)#4  | 2.431(6)  |
| C(28)-C(29)   | 1.351(14) | O(4)-Nd(2)#4  | 2.324(7)  |
| C(28)-H(28)   | 0.9300    | O(5)-Nd(1)    | 2.495(6)  |
| C(29)-C(30)   | 1.452(13) | O(5)-Nd(2)    | 2.767(7)  |
| C(29)-S(5)    | 1.720(9)  | O(6)-Nd(2)    | 2.452(7)  |
| C(30)-O(20)   | 1.258(12) | O(7)-Nd(1)#5  | 2.375(7)  |
| O(22)-Nd(4)   | 2.457(6)  | O(8)-Nd(5)#2  | 2.415(6)  |
| O(23)-Nd(5)#2 | 2.364(6)  | O(9)-Nd(1)    | 2.490(7)  |
| O(23)-Nd(6)#2 | 2.876(7)  | O(10)-Nd(2)   | 2.360(6)  |
| O(24)-Nd(6)#2 | 2.480(7)  | O(11)-Nd(1)#6 | 2.451(7)  |
| O(25)-Nd(3)   | 2.470(6)  | O(12)-Nd(5)#7 | 2.322(7)  |
| O(26)-Nd(4)   | 2.392(6)  | O(13)-Nd(2)   | 2.340(6)  |
| O(27)-Nd(6)#1 | 2.435(7)  | O(14)-Nd(3)   | 2.451(7)  |
| O(28)-Nd(4)#8 | 2.318(7)  | O(15)-Nd(5)   | 2.406(6)  |
| O(29)-Nd(3)   | 2.400(6)  | O(16)-Nd(6)   | 2.512(7)  |
| O(29)-Nd(4)   | 2.845(7)  | O(17)-Nd(2)   | 2.457(7)  |
| O(30)-Nd(4)   | 2.494(6)  | O(18)-Nd(3)   | 2.341(7)  |
| O(31)-Nd(4)#9 | 2.429(7)  | O(19)-Nd(3)   | 2.668(6)  |
| O(32)-Nd(6)   | 2.341(7)  | O(19)-Nd(2)   | 2.695(6)  |
| O(33)-Nd(5)   | 2.408(6)  | O(19)-H(19A)  | 0.85(3)   |
| O(34)-Nd(6)   | 2.403(6)  | O(19)-H(19B)  | 0.85(3)   |
| O(35)-Nd(3)#3 | 2.505(7)  | O(20)-Nd(6)#1 | 2.426(6)  |
| O(36)-Nd(4)#3 | 2.378(6)  | O(20)-Nd(5)#1 | 2.807(6)  |
| O(36)-Nd(3)#3 | 2.843(7)  | O(21)-Nd(3)   | 2.413(6)  |
| O(42)-Nd(6)   | 2.610(6)  | O(43)-Nd(5)#1 | 2.502(6)  |
| O(42)-H(42B)  | 0.85(3)   | O(44)-Nd(1)   | 2.561(6)  |
| O(42)-H(42A)  | 0.85(3)   | O(44)-H(44A)  | 0.86(3)   |
| O(44)-H(44B)  | 0.85(3)   | C(68')-C(69') | 1.55(2)   |
| Nd(1)-O(7)#6  | 2.375(7)  | C(68')-H(68C) | 0.9700    |
| Nd(1)-O(3)#10 | 2.431(6)  | C(68')-H(68D) | 0.9700    |
| Nd(1)-O(37)   | 2.444(7)  | C(69')-H(69D) | 0.9600    |
| Nd(1)-O(11)#5 | 2.451(7)  | C(69')-H(69E) | 0.9600    |
| Nd(2)-O(4)#10 | 2.324(7)  | C(69')-H(69F) | 0.9600    |
| Nd(3)-O(38)   | 2.484(7)  | O(40)-C(70)   | 1.226(12) |
| Nd(3)-O(35)#7 | 2.505(7)  | N(4)-C(70)    | 1.336(12) |

|                |           |              |           |
|----------------|-----------|--------------|-----------|
| Nd(3)-O(36)#7  | 2.843(7)  | N(4)-C(71)   | 1.456(15) |
| Nd(3)-C(54)#7  | 3.027(11) | N(4)-C(73)   | 1.483(17) |
| Nd(4)-O(28)#11 | 2.318(7)  | C(70)-H(70)  | 0.9300    |
| Nd(4)-O(36)#7  | 2.378(6)  | C(71)-C(72)  | 1.491(19) |
| Nd(4)-O(31)#12 | 2.429(7)  | C(71)-H(71A) | 0.9700    |
| Nd(4)-O(39)    | 2.445(7)  | C(71)-H(71B) | 0.9700    |
| Nd(5)-O(12)#3  | 2.322(7)  | C(72)-H(72A) | 0.9600    |
| Nd(5)-O(23)#13 | 2.364(6)  | C(72)-H(72B) | 0.9600    |
| Nd(5)-O(8)#13  | 2.416(6)  | C(72)-H(72C) | 0.9600    |
| Nd(5)-O(41)    | 2.454(6)  | C(73)-C(74)  | 1.50(2)   |
| Nd(5)-O(43)#14 | 2.503(6)  | C(73)-H(73A) | 0.9700    |
| Nd(5)-O(20)#14 | 2.807(6)  | C(73)-H(73B) | 0.9700    |
| Nd(5)-C(30)#14 | 3.032(10) | C(74)-H(74A) | 0.9600    |
| Nd(6)-O(20)#14 | 2.426(6)  | C(74)-H(74B) | 0.9600    |
| Nd(6)-O(27)#14 | 2.435(7)  | C(74)-H(74C) | 0.9600    |
| Nd(6)-O(40)    | 2.463(6)  | N(5)-C(76)   | 1.43(2)   |
| Nd(6)-O(24)#13 | 2.480(7)  | N(5)-C(78)   | 1.46(3)   |
| Nd(6)-O(23)#13 | 2.877(7)  | N(5)-C(75)   | 1.46(2)   |
| Nd(6)-C(36)#13 | 3.041(11) | C(75)-O(41)  | 1.19(2)   |
| N(1)-C(55)     | 1.40(2)   | C(75)-H(75)  | 0.9300    |
| N(1)-C(56)     | 1.47(2)   | C(76)-C(77)  | 1.53(3)   |
| N(1)-C(58)     | 1.52(2)   | C(76)-H(76A) | 0.9700    |
| C(55)-O(37)    | 1.18(3)   | C(76)-H(76B) | 0.9700    |
| C(55)-H(55)    | 0.9300    | C(77)-H(77A) | 0.9600    |
| C(56)-C(57)    | 1.52(3)   | C(77)-H(77B) | 0.9600    |
| C(56)-H(56A)   | 0.9700    | C(77)-H(77C) | 0.9600    |
| C(56)-H(56B)   | 0.9700    | C(78)-C(79)  | 1.55(3)   |
| C(57)-H(57A)   | 0.9600    | C(78)-H(78A) | 0.9700    |
| C(57)-H(57B)   | 0.9600    | C(78)-H(78B) | 0.9700    |
| C(57)-H(57C)   | 0.9600    | C(79)-H(79A) | 0.9600    |
| C(58)-C(59)    | 1.60(3)   | C(79)-H(79B) | 0.9600    |
| C(58)-H(58A)   | 0.9700    | C(79)-H(79C) | 0.9600    |
| C(58)-H(58B)   | 0.9700    | N(5')-C(75') | 1.42(2)   |
| C(59)-H(59A)   | 0.9600    | N(5')-C(78') | 1.46(2)   |
| C(59)-H(59B)   | 0.9600    | N(5')-C(76') | 1.46(2)   |
| C(59)-H(59C)   | 0.9600    | C(75')-O(41) | 1.17(2)   |



|               |           |               |           |
|---------------|-----------|---------------|-----------|
| N(1')-C(55')  | 1.41(2)   | C(75')-H(75') | 0.9300    |
| N(1')-C(56')  | 1.44(3)   | C(76')-C(77') | 1.47(3)   |
| N(1')-C(58')  | 1.47(2)   | C(76')-H(76C) | 0.9700    |
| C(55')-O(37)  | 1.23(3)   | C(76')-H(76D) | 0.9700    |
| C(55')-H(55') | 0.9300    | C(77')-H(77D) | 0.9600    |
| C(56')-C(57') | 1.46(3)   | C(77')-H(77E) | 0.9600    |
| C(56')-H(56C) | 0.9700    | C(77')-H(77F) | 0.9600    |
| C(56')-H(56D) | 0.9700    | C(78')-C(79') | 1.53(3)   |
| C(57')-H(57D) | 0.9600    | C(78')-H(78C) | 0.9700    |
| C(57')-H(57E) | 0.9600    | C(78')-H(78D) | 0.9700    |
| C(57')-H(57F) | 0.9600    | C(79')-H(79D) | 0.9600    |
| C(58')-C(59') | 1.55(3)   | C(79')-H(79E) | 0.9600    |
| C(58')-H(58C) | 0.9700    | C(79')-H(79F) | 0.9600    |
| C(58')-H(58D) | 0.9700    | C(68)-H(68B)  | 0.9700    |
| C(59')-H(59D) | 0.9600    | C(69)-H(69A)  | 0.9600    |
| C(59')-H(59E) | 0.9600    | C(69)-H(69B)  | 0.9600    |
| C(59')-H(59F) | 0.9600    | C(69)-H(69C)  | 0.9600    |
| O(38)-C(60)   | 1.217(12) | N(3')-C(65')  | 1.370(19) |
| N(2)-C(60)    | 1.358(13) | N(3')-C(68')  | 1.45(2)   |
| N(2)-C(63)    | 1.472(18) | N(3')-C(66')  | 1.47(2)   |
| N(2)-C(61)    | 1.502(17) | C(65')-O(39)  | 1.213(18) |
| C(60)-H(60)   | 0.9300    | C(65')-H(65') | 0.9300    |
| C(61)-C(62)   | 1.48(2)   | C(66')-C(67') | 1.53(2)   |
| C(61)-H(61A)  | 0.9700    | C(66')-H(66C) | 0.9700    |
| C(61)-H(61B)  | 0.9700    | C(66')-H(66D) | 0.9700    |
| C(62)-H(62A)  | 0.9600    | C(67')-H(67D) | 0.9600    |
| C(62)-H(62B)  | 0.9600    | C(65)-O(39)   | 1.22(2)   |
| C(62)-H(624)  | 0.9600    | C(65)-H(65)   | 0.9300    |
| C(63)-C(64)   | 1.47(2)   | C(66)-C(67)   | 1.52(3)   |
| C(63)-H(63A)  | 0.9700    | C(66)-H(66A)  | 0.9700    |
| C(63)-H(63B)  | 0.9700    | C(66)-H(66B)  | 0.9700    |
| C(64)-H(64A)  | 0.9600    | C(67)-H(67A)  | 0.9600    |
| C(64)-H(64B)  | 0.9600    | C(67)-H(67B)  | 0.9600    |
| C(64)-H(64C)  | 0.9600    | C(67)-H(67C)  | 0.9600    |
| N(3)-C(65)    | 1.38(2)   | C(68)-C(69)   | 1.50(3)   |
| N(3)-C(66)    | 1.45(2)   | C(68)-H(68A)  | 0.9700    |

|                   |           |                     |           |
|-------------------|-----------|---------------------|-----------|
| N(3)-C(68)        | 1.46(2)   | C(67')-H(67E)       | 0.9600    |
| C(67')-H(67F)     | 0.9600    |                     |           |
| O(2)-C(1)-O(1)    | 126.6(9)  | C(33)-C(32)-C(31)   | 126.2(10) |
| O(2)-C(1)-C(2)    | 115.7(10) | C(33)-C(32)-S(6)    | 112.5(7)  |
| O(1)-C(1)-C(2)    | 117.7(9)  | C(31)-C(32)-S(6)    | 121.2(8)  |
| C(3)-C(2)-C(1)    | 126.6(10) | C(32)-C(33)-C(34)   | 111.3(9)  |
| C(3)-C(2)-S(1)    | 110.8(7)  | C(32)-C(33)-H(33)   | 124.4     |
| C(1)-C(2)-S(1)    | 122.6(8)  | C(34)-C(33)-H(33)   | 124.4     |
| C(2)-C(3)-C(4)    | 113.6(10) | C(35)-C(34)-C(33)   | 112.7(9)  |
| C(2)-C(3)-H(3)    | 123.2     | C(35)-C(34)-H(34)   | 123.6     |
| C(4)-C(3)-H(3)    | 123.2     | C(33)-C(34)-H(34)   | 123.6     |
| C(5)-C(4)-C(3)    | 111.2(10) | C(34)-C(35)-C(36)   | 128.5(9)  |
| C(5)-C(4)-H(4)    | 124.4     | C(34)-C(35)-S(6)    | 112.3(7)  |
| C(3)-C(4)-H(4)    | 124.4     | C(36)-C(35)-S(6)    | 119.1(8)  |
| C(4)-C(5)-C(6)    | 126.2(10) | O(24)-C(36)-O(23)   | 121.7(10) |
| C(4)-C(5)-S(1)    | 112.8(8)  | O(24)-C(36)-C(35)   | 120.0(9)  |
| C(6)-C(5)-S(1)    | 121.1(8)  | O(23)-C(36)-C(35)   | 118.2(10) |
| O(3)-C(6)-O(4)    | 124.1(9)  | O(24)-C(36)-Nd(6)#2 | 52.1(5)   |
| O(3)-C(6)-C(5)    | 117.2(10) | O(23)-C(36)-Nd(6)#2 | 70.4(6)   |
| O(4)-C(6)-C(5)    | 118.6(10) | C(35)-C(36)-Nd(6)#2 | 168.0(8)  |
| O(5)-C(7)-O(6)    | 122.9(9)  | O(26)-C(37)-O(25)   | 126.0(9)  |
| O(5)-C(7)-C(8)    | 119.2(10) | O(26)-C(37)-C(38)   | 116.6(10) |
| O(6)-C(7)-C(8)    | 117.9(9)  | O(25)-C(37)-C(38)   | 117.3(10) |
| O(5)-C(7)-Nd(2)   | 68.8(5)   | C(39)-C(38)-C(37)   | 127.7(10) |
| O(6)-C(7)-Nd(2)   | 54.2(5)   | C(39)-C(38)-S(7)    | 112.1(7)  |
| C(8)-C(7)-Nd(2)   | 170.8(8)  | C(37)-C(38)-S(7)    | 120.1(8)  |
| C(9)-C(8)-C(7)    | 129.1(10) | C(38)-C(39)-C(40)   | 111.7(10) |
| C(9)-C(8)-S(2)    | 111.5(8)  | C(38)-C(39)-H(39)   | 124.2     |
| C(7)-C(8)-S(2)    | 119.3(9)  | C(40)-C(39)-H(39)   | 124.2     |
| C(8)-C(9)-C(10)   | 112.8(10) | C(41)-C(40)-C(39)   | 112.7(10) |
| C(8)-C(9)-H(9)    | 123.6     | C(41)-C(40)-H(40)   | 123.6     |
| C(10)-C(9)-H(9)   | 123.6     | C(39)-C(40)-H(40)   | 123.6     |
| C(11)-C(10)-C(9)  | 112.2(11) | C(40)-C(41)-C(42)   | 127.3(10) |
| C(11)-C(10)-H(10) | 123.9     | C(40)-C(41)-S(7)    | 112.4(8)  |
| C(9)-C(10)-H(10)  | 123.9     | C(42)-C(41)-S(7)    | 120.2(8)  |

|                   |           |                   |           |
|-------------------|-----------|-------------------|-----------|
| C(10)-C(11)-C(12) | 125.8(10) | O(27)-C(42)-O(28) | 126.2(10) |
| C(10)-C(11)-S(2)  | 112.0(8)  | O(27)-C(42)-C(41) | 119.3(10) |
| C(12)-C(11)-S(2)  | 122.2(9)  | O(28)-C(42)-C(41) | 114.5(10) |
| O(7)-C(12)-O(8)   | 125.1(9)  | O(30)-C(43)-O(29) | 121.5(9)  |
| O(7)-C(12)-C(11)  | 117.2(10) | O(30)-C(43)-C(44) | 119.6(9)  |
| O(8)-C(12)-C(11)  | 117.6(9)  | O(29)-C(43)-C(44) | 118.9(10) |
| O(9)-C(13)-O(10)  | 126.3(10) | O(30)-C(43)-Nd(4) | 52.9(5)   |
| O(9)-C(13)-C(14)  | 118.0(10) | O(29)-C(43)-Nd(4) | 69.1(5)   |
| O(10)-C(13)-C(14) | 115.8(10) | C(44)-C(43)-Nd(4) | 170.0(7)  |
| C(15)-C(14)-C(13) | 127.7(10) | C(45)-C(44)-C(43) | 127.5(9)  |
| C(15)-C(14)-S(3)  | 110.7(8)  | C(45)-C(44)-S(8)  | 111.9(7)  |
| C(13)-C(14)-S(3)  | 121.6(8)  | C(43)-C(44)-S(8)  | 120.6(8)  |
| C(14)-C(15)-C(16) | 112.9(10) | C(44)-C(45)-C(46) | 112.2(9)  |
| C(14)-C(15)-H(15) | 123.6     | C(44)-C(45)-H(45) | 123.9     |
| C(16)-C(15)-H(15) | 123.6     | C(46)-C(45)-H(45) | 123.9     |
| C(17)-C(16)-C(15) | 113.2(10) | C(47)-C(46)-C(45) | 113.1(10) |
| C(17)-C(16)-H(16) | 123.4     | C(47)-C(46)-H(46) | 123.5     |
| C(15)-C(16)-H(16) | 123.4     | C(45)-C(46)-H(46) | 123.5     |
| C(16)-C(17)-C(18) | 127.3(11) | C(46)-C(47)-C(48) | 126.1(10) |
| C(16)-C(17)-S(3)  | 110.3(8)  | C(46)-C(47)-S(8)  | 111.5(8)  |
| C(18)-C(17)-S(3)  | 122.0(9)  | C(48)-C(47)-S(8)  | 122.3(8)  |
| O(11)-C(18)-O(12) | 125.8(10) | O(31)-C(48)-O(32) | 125.9(11) |
| O(11)-C(18)-C(17) | 117.7(11) | O(31)-C(48)-C(47) | 120.8(10) |
| O(12)-C(18)-C(17) | 116.4(11) | O(32)-C(48)-C(47) | 113.2(11) |
| O(14)-C(19)-O(13) | 127.0(10) | O(33)-C(49)-O(34) | 127.6(10) |
| O(14)-C(19)-C(20) | 117.6(10) | O(33)-C(49)-C(50) | 117.3(9)  |
| O(13)-C(19)-C(20) | 115.4(11) | O(34)-C(49)-C(50) | 115.1(10) |
| C(21)-C(20)-C(19) | 127.5(10) | C(51)-C(50)-C(49) | 126.9(10) |
| C(21)-C(20)-S(4)  | 111.4(8)  | C(51)-C(50)-S(9)  | 112.9(7)  |
| C(19)-C(20)-S(4)  | 120.9(9)  | C(49)-C(50)-S(9)  | 120.2(8)  |
| C(20)-C(21)-C(22) | 114.1(10) | C(50)-C(51)-C(52) | 111.3(10) |
| C(20)-C(21)-H(21) | 122.9     | C(50)-C(51)-H(51) | 124.3     |
| C(22)-C(21)-H(21) | 122.9     | C(52)-C(51)-H(51) | 124.3     |
| C(23)-C(22)-C(21) | 110.9(10) | C(53)-C(52)-C(51) | 113.3(10) |
| C(23)-C(22)-H(22) | 124.6     | C(53)-C(52)-H(52) | 123.3     |
| C(21)-C(22)-H(22) | 124.6     | C(51)-C(52)-H(52) | 123.3     |

|                     |           |                     |            |
|---------------------|-----------|---------------------|------------|
| C(22)-C(23)-C(24)   | 129.0(10) | C(52)-C(53)-C(54)   | 128.2(9)   |
| C(22)-C(23)-S(4)    | 112.9(8)  | C(52)-C(53)-S(9)    | 111.1(7)   |
| C(24)-C(23)-S(4)    | 117.9(8)  | C(54)-C(53)-S(9)    | 120.7(8)   |
| O(16)-C(24)-O(15)   | 126.3(10) | O(36)-C(54)-O(35)   | 122.9(10)  |
| O(16)-C(24)-C(23)   | 119.6(10) | O(36)-C(54)-C(53)   | 119.4(10)  |
| O(15)-C(24)-C(23)   | 114.1(11) | O(35)-C(54)-C(53)   | 117.7(9)   |
| O(18)-C(25)-O(17)   | 124.0(10) | O(36)-C(54)-Nd(3)#3 | 69.6(6)    |
| O(18)-C(25)-C(26)   | 115.9(10) | O(35)-C(54)-Nd(3)#3 | 54.0(5)    |
| O(17)-C(25)-C(26)   | 120.1(10) | C(53)-C(54)-Nd(3)#3 | 166.9(8)   |
| C(27)-C(26)-C(25)   | 124.6(10) | C(1)-O(1)-Nd(2)     | 127.8(6)   |
| C(27)-C(26)-S(5)    | 110.6(8)  | C(1)-O(2)-Nd(1)     | 146.5(7)   |
| C(25)-C(26)-S(5)    | 124.8(8)  | C(6)-O(3)-Nd(1)#4   | 115.7(6)   |
| C(26)-C(27)-C(28)   | 114.1(10) | C(6)-O(4)-Nd(2)#4   | 168.7(8)   |
| C(26)-C(27)-H(27)   | 122.9     | C(7)-O(5)-Nd(1)     | 165.7(7)   |
| C(28)-C(27)-H(27)   | 122.9     | C(7)-O(5)-Nd(2)     | 86.5(6)    |
| C(29)-C(28)-C(27)   | 112.3(10) | Nd(1)-O(5)-Nd(2)    | 107.3(2)   |
| C(29)-C(28)-H(28)   | 123.8     | C(7)-O(6)-Nd(2)     | 101.3(6)   |
| C(27)-C(28)-H(28)   | 123.8     | C(12)-O(7)-Nd(1)#5  | 170.8(8)   |
| C(28)-C(29)-C(30)   | 127.1(9)  | C(12)-O(8)-Nd(5)#2  | 132.4(6)   |
| C(28)-C(29)-S(5)    | 111.2(7)  | C(13)-O(9)-Nd(1)    | 144.0(7)   |
| C(30)-C(29)-S(5)    | 121.7(8)  | C(13)-O(10)-Nd(2)   | 133.1(7)   |
| O(20)-C(30)-O(43)   | 120.8(9)  | C(18)-O(11)-Nd(1)#6 | 122.8(7)   |
| O(20)-C(30)-C(29)   | 120.6(10) | C(18)-O(12)-Nd(5)#7 | 143.3(7)   |
| O(43)-C(30)-C(29)   | 118.5(9)  | C(19)-O(13)-Nd(2)   | 141.9(8)   |
| O(20)-C(30)-Nd(5)#1 | 67.7(5)   | C(19)-O(14)-Nd(3)   | 130.6(7)   |
| O(43)-C(30)-Nd(5)#1 | 53.8(5)   | C(24)-O(15)-Nd(5)   | 131.8(7)   |
| C(29)-C(30)-Nd(5)#1 | 167.2(7)  | C(24)-O(16)-Nd(6)   | 139.7(7)   |
| O(21)-C(31)-O(22)   | 126.7(9)  | C(25)-O(17)-Nd(2)   | 128.3(7)   |
| O(21)-C(31)-C(32)   | 117.0(10) | C(25)-O(18)-Nd(3)   | 169.6(8)   |
| O(22)-C(31)-C(32)   | 116.3(9)  | Nd(3)-O(19)-Nd(2)   | 123.55(18) |
| C(37)-O(25)-Nd(3)   | 137.8(6)  | Nd(3)-O(19)-H(19A)  | 88(6)      |
| C(37)-O(26)-Nd(4)   | 134.0(7)  | Nd(2)-O(19)-H(19A)  | 114(7)     |
| C(42)-O(27)-Nd(6)#1 | 134.0(7)  | Nd(3)-O(19)-H(19B)  | 120(6)     |
| C(42)-O(28)-Nd(4)#8 | 146.3(7)  | Nd(2)-O(19)-H(19B)  | 101(7)     |
| C(43)-O(29)-Nd(3)   | 169.1(7)  | H(19A)-O(19)-H(19B) | 110(4)     |
| C(43)-O(29)-Nd(4)   | 86.3(6)   | C(30)-O(20)-Nd(6)#1 | 168.4(7)   |

|                       |          |                       |          |
|-----------------------|----------|-----------------------|----------|
| Nd(3)-O(29)-Nd(4)     | 104.4(2) | C(30)-O(20)-Nd(5)#1   | 87.8(6)  |
| C(43)-O(30)-Nd(4)     | 103.5(6) | Nd(6)#1-O(20)-Nd(5)#1 | 103.8(2) |
| C(48)-O(31)-Nd(4)#9   | 134.5(7) | C(31)-O(21)-Nd(3)     | 137.1(7) |
| C(48)-O(32)-Nd(6)     | 161.8(8) | C(31)-O(22)-Nd(4)     | 134.7(6) |
| C(49)-O(33)-Nd(5)     | 134.3(6) | C(36)-O(23)-Nd(5)#2   | 167.7(7) |
| C(49)-O(34)-Nd(6)     | 137.3(7) | C(36)-O(23)-Nd(6)#2   | 84.9(6)  |
| C(54)-O(35)-Nd(3)#3   | 102.2(6) | Nd(5)#2-O(23)-Nd(6)#2 | 103.4(2) |
| C(54)-O(36)-Nd(4)#3   | 168.6(7) | C(36)-O(24)-Nd(6)#2   | 104.7(6) |
| C(54)-O(36)-Nd(3)#3   | 86.2(6)  | O(18)-Nd(3)-O(14)     | 92.7(3)  |
| Nd(4)#3-O(36)-Nd(3)#3 | 105.0(2) | O(29)-Nd(3)-O(14)     | 90.0(2)  |
| Nd(6)-O(42)-H(42B)    | 115(5)   | O(21)-Nd(3)-O(14)     | 76.8(3)  |
| Nd(6)-O(42)-H(42A)    | 131(8)   | O(18)-Nd(3)-O(25)     | 85.0(2)  |
| H(42B)-O(42)-H(42A)   | 110(5)   | O(29)-Nd(3)-O(25)     | 76.3(2)  |
| C(30)-O(43)-Nd(5)#1   | 102.0(6) | O(21)-Nd(3)-O(25)     | 129.3(2) |
| Nd(1)-O(44)-H(44A)    | 123(10)  | O(14)-Nd(3)-O(25)     | 142.2(2) |
| Nd(1)-O(44)-H(44B)    | 114(9)   | O(18)-Nd(3)-O(38)     | 73.8(3)  |
| H(44A)-O(44)-H(44B)   | 107(4)   | O(29)-Nd(3)-O(38)     | 81.3(2)  |
| C(5)-S(1)-C(2)        | 91.7(5)  | O(21)-Nd(3)-O(38)     | 137.8(2) |
| C(11)-S(2)-C(8)       | 91.5(5)  | O(14)-Nd(3)-O(38)     | 70.3(2)  |
| C(17)-S(3)-C(14)      | 92.8(5)  | O(25)-Nd(3)-O(38)     | 72.9(2)  |
| C(20)-S(4)-C(23)      | 90.7(5)  | O(18)-Nd(3)-O(35)#7   | 72.1(3)  |
| C(26)-S(5)-C(29)      | 91.7(5)  | O(29)-Nd(3)-O(35)#7   | 123.0(2) |
| C(32)-S(6)-C(35)      | 91.2(5)  | O(21)-Nd(3)-O(35)#7   | 84.5(3)  |
| C(41)-S(7)-C(38)      | 91.0(5)  | O(14)-Nd(3)-O(35)#7   | 135.0(2) |
| C(47)-S(8)-C(44)      | 91.3(5)  | O(25)-Nd(3)-O(35)#7   | 79.9(2)  |
| C(50)-S(9)-C(53)      | 91.4(5)  | O(38)-Nd(3)-O(35)#7   | 137.6(2) |
| O(2)-Nd(1)-O(7)#6     | 137.9(3) | O(18)-Nd(3)-O(19)     | 67.5(2)  |
| O(2)-Nd(1)-O(3)#10    | 82.1(3)  | O(29)-Nd(3)-O(19)     | 138.5(2) |
| O(7)#6-Nd(1)-O(3)#10  | 74.5(3)  | O(21)-Nd(3)-O(19)     | 67.3(2)  |
| O(2)-Nd(1)-O(37)      | 138.8(3) | O(14)-Nd(3)-O(19)     | 70.6(2)  |
| O(7)#6-Nd(1)-O(37)    | 77.9(3)  | O(25)-Nd(3)-O(19)     | 139.8(2) |
| O(3)#10-Nd(1)-O(37)   | 136.2(3) | O(38)-Nd(3)-O(19)     | 122.3(2) |
| O(2)-Nd(1)-O(11)#5    | 81.4(3)  | O(35)#7-Nd(3)-O(19)   | 64.4(2)  |
| O(7)#6-Nd(1)-O(11)#5  | 99.1(3)  | O(18)-Nd(3)-O(36)#7   | 114.8(2) |
| O(3)#10-Nd(1)-O(11)#5 | 146.1(3) | O(29)-Nd(3)-O(36)#7   | 75.1(2)  |
| O(37)-Nd(1)-O(11)#5   | 71.2(3)  | O(21)-Nd(3)-O(36)#7   | 69.3(2)  |

|                     |          |                         |            |
|---------------------|----------|-------------------------|------------|
| O(2)-Nd(1)-O(9)     | 119.6(2) | O(14)-Nd(3)-O(36)#7     | 145.6(2)   |
| O(7)#6-Nd(1)-O(9)   | 86.9(2)  | O(25)-Nd(3)-O(36)#7     | 64.6(2)    |
| O(3)#10-Nd(1)-O(9)  | 73.8(2)  | O(38)-Nd(3)-O(36)#7     | 134.9(2)   |
| O(37)-Nd(1)-O(9)    | 71.4(3)  | O(35)#7-Nd(3)-O(36)#7   | 47.9(2)    |
| O(11)#5-Nd(1)-O(9)  | 139.9(3) | O(19)-Nd(3)-O(36)#7     | 100.24(19) |
| O(2)-Nd(1)-O(5)     | 68.7(2)  | O(18)-Nd(3)-C(54)#7     | 92.5(3)    |
| O(7)#6-Nd(1)-O(5)   | 153.3(3) | O(29)-Nd(3)-C(54)#7     | 99.3(3)    |
| O(3)#10-Nd(1)-O(5)  | 114.3(2) | O(21)-Nd(3)-C(54)#7     | 77.7(2)    |
| O(37)-Nd(1)-O(5)    | 79.3(2)  | O(14)-Nd(3)-C(54)#7     | 148.9(3)   |
| O(11)#5-Nd(1)-O(5)  | 86.6(2)  | O(25)-Nd(3)-C(54)#7     | 68.8(3)    |
| O(9)-Nd(1)-O(5)     | 72.7(2)  | O(38)-Nd(3)-C(54)#7     | 140.3(3)   |
| O(2)-Nd(1)-O(44)    | 68.0(2)  | O(35)#7-Nd(3)-C(54)#7   | 23.8(3)    |
| O(7)#6-Nd(1)-O(44)  | 71.5(3)  | O(19)-Nd(3)-C(54)#7     | 83.2(3)    |
| O(3)#10-Nd(1)-O(44) | 71.3(3)  | O(36)#7-Nd(3)-C(54)#7   | 24.2(2)    |
| O(37)-Nd(1)-O(44)   | 129.6(2) | O(28)#11-Nd(4)-O(36)#7  | 156.2(2)   |
| O(11)#5-Nd(1)-O(44) | 75.1(3)  | O(28)#11-Nd(4)-O(26)    | 126.7(2)   |
| O(9)-Nd(1)-O(44)    | 142.6(3) | O(36)#7-Nd(4)-O(26)     | 75.1(2)    |
| O(5)-Nd(1)-O(44)    | 134.9(2) | O(28)#11-Nd(4)-O(31)#12 | 85.8(3)    |
| O(4)#10-Nd(2)-O(13) | 139.3(3) | O(36)#7-Nd(4)-O(31)#12  | 90.0(2)    |
| O(4)#10-Nd(2)-O(10) | 77.6(3)  | O(26)-Nd(4)-O(31)#12    | 79.2(3)    |
| O(13)-Nd(2)-O(10)   | 137.4(2) | O(28)#11-Nd(4)-O(39)    | 78.9(2)    |
| O(4)#10-Nd(2)-O(1)  | 80.4(2)  | O(36)#7-Nd(4)-O(39)     | 77.6(2)    |
| O(13)-Nd(2)-O(1)    | 79.4(2)  | O(26)-Nd(4)-O(39)       | 138.9(2)   |
| O(10)-Nd(2)-O(1)    | 138.5(2) | O(31)#12-Nd(4)-O(39)    | 70.5(3)    |
| O(4)#10-Nd(2)-O(6)  | 132.4(2) | O(28)#11-Nd(4)-O(22)    | 88.3(2)    |
| O(13)-Nd(2)-O(6)    | 79.0(3)  | O(36)#7-Nd(4)-O(22)     | 80.9(2)    |
| O(10)-Nd(2)-O(6)    | 86.8(3)  | O(26)-Nd(4)-O(22)       | 131.7(2)   |
| O(1)-Nd(2)-O(6)     | 82.7(3)  | O(31)#12-Nd(4)-O(22)    | 142.5(3)   |
| O(4)#10-Nd(2)-O(17) | 78.6(2)  | O(39)-Nd(4)-O(22)       | 72.0(2)    |
| O(13)-Nd(2)-O(17)   | 82.7(2)  | O(28)#11-Nd(4)-O(30)    | 74.6(2)    |
| O(10)-Nd(2)-O(17)   | 87.4(3)  | O(36)#7-Nd(4)-O(30)     | 123.4(2)   |
| O(1)-Nd(2)-O(17)    | 121.9(3) | O(26)-Nd(4)-O(30)       | 80.0(2)    |
| O(6)-Nd(2)-O(17)    | 145.9(2) | O(31)#12-Nd(4)-O(30)    | 133.8(2)   |
| O(4)#10-Nd(2)-O(19) | 139.0(2) | O(39)-Nd(4)-O(30)       | 141.1(2)   |
| O(13)-Nd(2)-O(19)   | 72.5(2)  | O(22)-Nd(4)-O(30)       | 79.3(2)    |
| O(10)-Nd(2)-O(19)   | 65.2(2)  | O(28)#11-Nd(4)-O(29)    | 119.3(2)   |

|                         |           |                        |          |
|-------------------------|-----------|------------------------|----------|
| O(1)-Nd(2)-O(19)        | 139.6(3)  | O(36)#7-Nd(4)-O(29)    | 75.4(2)  |
| O(6)-Nd(2)-O(19)        | 64.2(3)   | O(26)-Nd(4)-O(29)      | 67.7(2)  |
| O(17)-Nd(2)-O(19)       | 83.0(2)   | O(31)#12-Nd(4)-O(29)   | 146.2(2) |
| O(4)#10-Nd(2)-O(5)      | 83.3(2)   | O(39)-Nd(4)-O(29)      | 132.7(2) |
| O(13)-Nd(2)-O(5)        | 122.3(2)  | O(22)-Nd(4)-O(29)      | 66.0(2)  |
| O(10)-Nd(2)-O(5)        | 71.2(2)   | O(30)-Nd(4)-O(29)      | 48.0(2)  |
| O(1)-Nd(2)-O(5)         | 71.6(2)   | O(28)#11-Nd(4)-C(43)   | 95.9(3)  |
| O(6)-Nd(2)-O(5)         | 49.2(2)   | O(36)#7-Nd(4)-C(43)    | 100.0(3) |
| O(17)-Nd(2)-O(5)        | 154.6(2)  | O(26)-Nd(4)-C(43)      | 74.2(2)  |
| O(19)-Nd(2)-O(5)        | 99.65(19) | O(31)#12-Nd(4)-C(43)   | 147.9(3) |
| O(4)#10-Nd(2)-C(7)      | 108.0(3)  | O(39)-Nd(4)-C(43)      | 141.3(3) |
| O(13)-Nd(2)-C(7)        | 100.4(3)  | O(22)-Nd(4)-C(43)      | 69.5(2)  |
| O(10)-Nd(2)-C(7)        | 78.8(3)   | O(30)-Nd(4)-C(43)      | 23.6(3)  |
| O(1)-Nd(2)-C(7)         | 75.2(3)   | O(29)-Nd(4)-C(43)      | 24.6(2)  |
| O(6)-Nd(2)-C(7)         | 24.4(3)   | O(12)#3-Nd(5)-O(23)#13 | 164.6(2) |
| O(17)-Nd(2)-C(7)        | 162.9(3)  | O(12)#3-Nd(5)-O(15)    | 111.3(2) |
| O(19)-Nd(2)-C(7)        | 82.0(3)   | (23)#13-Nd(5)-O(15)    | 77.1(2)  |
| O(5)-Nd(2)-C(7)         | 24.8(2)   | O(12)#3-Nd(5)-O(33)    | 99.3(2)  |
| O(18)-Nd(3)-O(29)       | 152.4(3)  | O(23)#13-Nd(5)-O(33)   | 81.9(2)  |
| O(18)-Nd(3)-O(21)       | 134.5(3)  | O(15)-Nd(5)-O(33)      | 134.8(2) |
| O(29)-Nd(3)-O(21)       | 72.8(2)   | O(12)#3-Nd(5)-O(8)#13  | 81.1(2)  |
| O(23)#13-Nd(5)-O(43)#14 | 125.7(2)  | O(23)#13-Nd(5)-O(8)#13 | 89.1(2)  |
| O(15)-Nd(5)-O(43)#14    | 78.6(2)   | O(15)-Nd(5)-O(8)#13    | 75.0(2)  |
| O(33)-Nd(5)-O(43)#14    | 82.1(2)   | O(33)-Nd(5)-O(8)#13    | 144.4(2) |
| O(8)#13-Nd(5)-O(43)#14  | 129.5(2)  | O(12)#3-Nd(5)-O(41)    | 78.7(3)  |
| O(41)-Nd(5)-O(43)#14    | 135.2(4)  | O(23)#13-Nd(5)-O(41)   | 87.1(3)  |
| O(12)#3-Nd(5)-O(20)#14  | 117.2(2)  | O(15)-Nd(5)-O(41)      | 144.0(4) |
| O(23)#13-Nd(5)-O(20)#14 | 77.5(2)   | O(33)-Nd(5)-O(41)      | 72.6(3)  |
| O(15)-Nd(5)-O(20)#14    | 69.5(2)   | O(8)#13-Nd(5)-O(41)    | 72.6(4)  |
| O(33)-Nd(5)-O(20)#14    | 67.1(2)   | O(12)#3-Nd(5)-O(43)#14 | 69.5(2)  |
| O(8)#13-Nd(5)-O(20)#14  | 144.0(2)  | C(58)-C(59)-H(59B)     | 109.5    |
| O(41)-Nd(5)-O(20)#14    | 138.4(3)  | H(59A)-C(59)-H(59B)    | 109.5    |
| O(43)#14-Nd(5)-O(20)#14 | 48.4(2)   | C(58)-C(59)-H(59C)     | 109.5    |
| O(12)#3-Nd(5)-C(30)#14  | 92.8(3)   | H(59A)-C(59)-H(59C)    | 109.5    |
| O(23)#13-Nd(5)-C(30)#14 | 102.0(3)  | H(59B)-C(59)-H(59C)    | 109.5    |
| O(15)-Nd(5)-C(30)#14    | 74.7(3)   | C(55')-N(1')-C(56')    | 119(2)   |

|                         |          |                      |           |
|-------------------------|----------|----------------------|-----------|
| O(33)-Nd(5)-C(30)#14    | 71.2(3)  | C(55')-N(1')-C(58')  | 116(2)    |
| O(8)#13-Nd(5)-C(30)#14  | 144.4(3) | C(56')-N(1')-C(58')  | 114(3)    |
| O(41)-Nd(5)-C(30)#14    | 140.9(4) | O(37)-C(55')-N(1')   | 119(3)    |
| O(43)#14-Nd(5)-C(30)#14 | 24.1(3)  | O(37)-C(55')-H(55')  | 120.7     |
| O(20)#14-Nd(5)-C(30)#14 | 24.5(2)  | N(1')-C(55')-H(55')  | 120.7     |
| O(32)-Nd(6)-O(34)       | 138.3(3) | N(1')-C(56')-C(57')  | 118(3)    |
| O(32)-Nd(6)-O(20)#14    | 148.9(3) | N(1')-C(56')-H(56C)  | 107.8     |
| O(34)-Nd(6)-O(20)#14    | 71.8(2)  | C(57')-C(56')-H(56C) | 107.8     |
| O(32)-Nd(6)-O(27)#14    | 90.3(3)  | N(1')-C(56')-H(56D)  | 107.8     |
| O(34)-Nd(6)-O(27)#14    | 77.5(3)  | C(57')-C(56')-H(56D) | 107.8     |
| O(20)#14-Nd(6)-O(27)#14 | 90.4(2)  | H(56C)-C(56')-H(56D) | 107.2     |
| O(32)-Nd(6)-O(40)       | 75.3(3)  | C(56')-C(57')-H(57D) | 109.5     |
| O(34)-Nd(6)-O(40)       | 133.9(2) | C(56')-C(57')-H(57E) | 109.5     |
| O(20)#14-Nd(6)-O(40)    | 75.7(2)  | H(57D)-C(57')-H(57E) | 109.5     |
| O(27)#14-Nd(6)-O(40)    | 70.9(3)  | C(56')-C(57')-H(57F) | 109.5     |
| O(32)-Nd(6)-O(24)#13    | 73.5(3)  | H(57D)-C(57')-H(57F) | 109.5     |
| O(34)-Nd(6)-O(24)#13    | 89.9(3)  | H(57E)-C(57')-H(57F) | 109.5     |
| O(20)#14-Nd(6)-O(24)#13 | 122.7(2) | N(1')-C(58')-C(59')  | 110(2)    |
| O(27)#14-Nd(6)-O(24)#13 | 139.0(2) | N(1')-C(58')-H(58C)  | 109.7     |
| O(40)-Nd(6)-O(24)#13    | 135.7(3) | C(59')-C(58')-H(58C) | 109.7     |
| O(32)-Nd(6)-O(16)       | 84.4(2)  | N(1')-C(58')-H(58D)  | 109.7     |
| O(34)-Nd(6)-O(16)       | 128.6(2) | C(59')-C(58')-H(58D) | 109.7     |
| O(20)#14-Nd(6)-O(16)    | 76.1(2)  | H(58C)-C(58')-H(58D) | 108.2     |
| O(27)#14-Nd(6)-O(16)    | 141.9(2) | C(58')-C(59')-H(59D) | 109.5     |
| O(40)-Nd(6)-O(16)       | 71.3(2)  | C(58')-C(59')-H(59E) | 109.5     |
| O(24)#13-Nd(6)-O(16)    | 75.0(2)  | H(59D)-C(59')-H(59E) | 109.5     |
| O(32)-Nd(6)-O(42)       | 69.7(3)  | C(58')-C(59')-H(59F) | 109.5     |
| O(34)-Nd(6)-O(42)       | 68.6(3)  | H(59D)-C(59')-H(59F) | 109.5     |
| O(20)#14-Nd(6)-O(42)    | 138.9(3) | H(59E)-C(59')-H(59F) | 109.5     |
| O(27)#14-Nd(6)-O(42)    | 70.7(3)  | C(60)-O(38)-Nd(3)    | 127.8(7)  |
| O(40)-Nd(6)-O(42)       | 126.9(2) | C(60)-N(2)-C(63)     | 120.4(13) |
| O(24)#13-Nd(6)-O(42)    | 68.3(3)  | C(60)-N(2)-C(61)     | 118.3(14) |
| O(16)-Nd(6)-O(42)       | 139.6(3) | C(63)-N(2)-C(61)     | 119.9(13) |
| O(32)-Nd(6)-O(23)#13    | 117.3(2) | O(38)-C(60)-N(2)     | 123.5(12) |
| O(34)-Nd(6)-O(23)#13    | 69.8(2)  | O(38)-C(60)-H(60)    | 118.2     |
| O(20)#14-Nd(6)-O(23)#13 | 75.2(2)  | N(2)-C(60)-H(60)     | 118.2     |



|                         |          |                     |           |
|-------------------------|----------|---------------------|-----------|
| O(27)#14-Nd(6)-O(23)#13 | 147.0(2) | C(62)-C(61)-N(2)    | 111.5(18) |
| O(40)-Nd(6)-O(23)#13    | 130.9(2) | C(62)-C(61)-H(61A)  | 109.3     |
| O(24)#13-Nd(6)-O(23)#13 | 47.7(2)  | N(2)-C(61)-H(61A)   | 109.3     |
| O(16)-Nd(6)-O(23)#13    | 63.8(2)  | C(62)-C(61)-H(61B)  | 109.3     |
| O(42)-Nd(6)-O(23)#13    | 100.7(2) | N(2)-C(61)-H(61B)   | 109.3     |
| O(32)-Nd(6)-C(36)#13    | 94.0(3)  | H(61A)-C(61)-H(61B) | 108.0     |
| O(34)-Nd(6)-C(36)#13    | 81.4(2)  | C(61)-C(62)-H(62A)  | 109.5     |
| O(20)#14-Nd(6)-C(36)#13 | 99.5(3)  | C(61)-C(62)-H(62B)  | 109.5     |
| O(27)#14-Nd(6)-C(36)#13 | 152.6(3) | H(62A)-C(62)-H(62B) | 109.5     |
| O(40)-Nd(6)-C(36)#13    | 136.3(3) | C(61)-C(62)-H(62A)  | 109.5     |
| O(24)#13-Nd(6)-C(36)#13 | 23.2(3)  | H(62A)-C(62)-H(62A) | 109.5     |
| O(16)-Nd(6)-C(36)#13    | 65.5(3)  | H(62B)-C(62)-H(62A) | 109.5     |
| O(42)-Nd(6)-C(36)#13    | 85.4(3)  | N(2)-C(63)-C(64)    | 110.2(18) |
| O(23)#13-Nd(6)-C(36)#13 | 24.6(2)  | N(2)-C(63)-H(63A)   | 109.6     |
| C(55)-N(1)-C(56)        | 117(2)   | C(64)-C(63)-H(63A)  | 109.6     |
| C(55)-N(1)-C(58)        | 113(2)   | N(2)-C(63)-H(63B)   | 109.6     |
| C(56)-N(1)-C(58)        | 131(3)   | C(64)-C(63)-H(63B)  | 109.6     |
| O(37)-C(55)-N(1)        | 123(3)   | H(63A)-C(63)-H(63B) | 108.1     |
| O(37)-C(55)-H(55)       | 118.5    | C(63)-C(64)-H(64A)  | 109.5     |
| N(1)-C(55)-H(55)        | 118.5    | C(63)-C(64)-H(64B)  | 109.5     |
| N(1)-C(56)-C(57)        | 112(3)   | H(64A)-C(64)-H(64B) | 109.5     |
| N(1)-C(56)-H(56A)       | 109.1    | C(63)-C(64)-H(64C)  | 109.5     |
| C(57)-C(56)-H(56A)      | 109.1    | H(64A)-C(64)-H(64C) | 109.5     |
| N(1)-C(56)-H(56B)       | 109.1    | H(64B)-C(64)-H(64C) | 109.5     |
| C(57)-C(56)-H(56B)      | 109.1    | C(65)-N(3)-C(66)    | 118(2)    |
| H(56A)-C(56)-H(56B)     | 107.9    | C(65)-N(3)-C(68)    | 120.0(18) |
| C(56)-C(57)-H(57A)      | 109.5    | C(66)-N(3)-C(68)    | 120(2)    |
| C(56)-C(57)-H(57B)      | 109.5    | O(39)-C(65)-N(3)    | 124(3)    |
| H(57A)-C(57)-H(57B)     | 109.5    | O(39)-C(65)-H(65)   | 118.0     |
| C(56)-C(57)-H(57C)      | 109.5    | N(3)-C(65)-H(65)    | 118.0     |
| H(57A)-C(57)-H(57C)     | 109.5    | N(3)-C(66)-C(67)    | 111(2)    |
| H(57B)-C(57)-H(57C)     | 109.5    | N(3)-C(66)-H(66A)   | 109.4     |
| N(1)-C(58)-C(59)        | 104(2)   | C(67)-C(66)-H(66A)  | 109.4     |
| N(1)-C(58)-H(58A)       | 110.9    | N(3)-C(66)-H(66B)   | 109.4     |
| C(59)-C(58)-H(58A)      | 110.9    | C(67)-C(66)-H(66B)  | 109.4     |
| N(1)-C(58)-H(58B)       | 110.9    | H(66A)-C(66)-H(66B) | 108.0     |

|                     |           |                      |           |
|---------------------|-----------|----------------------|-----------|
| C(59)-C(58)-H(58B)  | 110.9     | C(66)-C(67)-H(67A)   | 109.5     |
| H(58A)-C(58)-H(58B) | 108.9     | C(66)-C(67)-H(67B)   | 109.5     |
| C(58)-C(59)-H(59A)  | 109.5     | H(67A)-C(67)-H(67B)  | 109.5     |
| N(4)-C(73)-C(74)    | 109.2(16) | C(66)-C(67)-H(67C)   | 109.5     |
| N(4)-C(73)-H(73A)   | 109.8     | H(67A)-C(67)-H(67C)  | 109.5     |
| C(74)-C(73)-H(73A)  | 109.8     | H(67B)-C(67)-H(67C)  | 109.5     |
| N(4)-C(73)-H(73B)   | 109.8     | N(3)-C(68)-C(69)     | 112(2)    |
| C(74)-C(73)-H(73B)  | 109.8     | N(3)-C(68)-H(68A)    | 109.2     |
| H(73A)-C(73)-H(73B) | 108.3     | C(69)-C(68)-H(68A)   | 109.2     |
| C(73)-C(74)-H(74A)  | 109.5     | N(3)-C(68)-H(68B)    | 109.2     |
| C(73)-C(74)-H(74B)  | 109.5     | C(69)-C(68)-H(68B)   | 109.2     |
| H(74A)-C(74)-H(74B) | 109.5     | H(68A)-C(68)-H(68B)  | 107.9     |
| C(73)-C(74)-H(74C)  | 109.5     | C(68)-C(69)-H(69A)   | 109.5     |
| H(74A)-C(74)-H(74C) | 109.5     | C(68)-C(69)-H(69B)   | 109.5     |
| H(74B)-C(74)-H(74C) | 109.5     | H(69A)-C(69)-H(69B)  | 109.5     |
| C(76)-N(5)-C(78)    | 110(3)    | C(68)-C(69)-H(69C)   | 109.5     |
| C(76)-N(5)-C(75)    | 125(2)    | H(69A)-C(69)-H(69C)  | 109.5     |
| C(78)-N(5)-C(75)    | 124(2)    | H(69B)-C(69)-H(69C)  | 109.5     |
| O(41)-C(75)-N(5)    | 117(3)    | C(65')-N(3')-C(68')  | 120.1(17) |
| O(41)-C(75)-H(75)   | 121.3     | C(65')-N(3')-C(66')  | 117.3(16) |
| N(5)-C(75)-H(75)    | 121.3     | C(68')-N(3')-C(66')  | 120.9(18) |
| N(5)-C(76)-C(77)    | 120(4)    | O(39)-C(65')-N(3')   | 120(2)    |
| N(5)-C(76)-H(76A)   | 107.2     | O(39)-C(65')-H(65')  | 120.2     |
| C(77)-C(76)-H(76A)  | 107.2     | N(3')-C(65')-H(65')  | 120.2     |
| N(5)-C(76)-H(76B)   | 107.3     | N(3')-C(66')-C(67')  | 108.9(19) |
| C(77)-C(76)-H(76B)  | 107.3     | N(3')-C(66')-H(66C)  | 109.9     |
| H(76A)-C(76)-H(76B) | 106.9     | C(67')-C(66')-H(66C) | 109.9     |
| C(76)-C(77)-H(77A)  | 109.5     | N(3')-C(66')-H(66D)  | 109.9     |
| C(76)-C(77)-H(77B)  | 109.5     | C(67')-C(66')-H(66D) | 109.9     |
| H(77A)-C(77)-H(77B) | 109.5     | H(66C)-C(66')-H(66D) | 108.3     |
| C(76)-C(77)-H(77C)  | 109.5     | C(66')-C(67')-H(67D) | 109.5     |
| H(77A)-C(77)-H(77C) | 109.5     | C(66')-C(67')-H(67E) | 109.5     |
| H(77B)-C(77)-H(77C) | 109.5     | H(67D)-C(67')-H(67E) | 109.5     |
| N(5)-C(78)-C(79)    | 101(3)    | C(66')-C(67')-H(67F) | 109.5     |
| N(5)-C(78)-H(78A)   | 111.6     | H(67D)-C(67')-H(67F) | 109.5     |
| C(79)-C(78)-H(78A)  | 111.6     | H(67E)-C(67')-H(67F) | 109.5     |

|                      |        |                      |           |
|----------------------|--------|----------------------|-----------|
| N(5)-C(78)-H(78B)    | 111.5  | N(3')-C(68')-C(69')  | 110(2)    |
| C(79)-C(78)-H(78B)   | 111.5  | N(3')-C(68')-H(68C)  | 109.7     |
| H(78A)-C(78)-H(78B)  | 109.3  | C(69')-C(68')-H(68C) | 109.7     |
| C(78)-C(79)-H(79A)   | 109.5  | N(3')-C(68')-H(68D)  | 109.7     |
| C(78)-C(79)-H(79B)   | 109.5  | C(69')-C(68')-H(68D) | 109.7     |
| H(79A)-C(79)-H(79B)  | 109.5  | H(68C)-C(68')-H(68D) | 108.2     |
| C(78)-C(79)-H(79C)   | 109.4  | C(68')-C(69')-H(69D) | 109.5     |
| H(79A)-C(79)-H(79C)  | 109.5  | C(68')-C(69')-H(69E) | 109.5     |
| H(79B)-C(79)-H(79C)  | 109.5  | H(69D)-C(69')-H(69E) | 109.5     |
| C(75')-N(5')-C(78')  | 125(2) | C(68')-C(69')-H(69F) | 109.5     |
| C(75')-N(5')-C(76')  | 125(2) | H(69D)-C(69')-H(69F) | 109.5     |
| C(78')-N(5')-C(76')  | 107(2) | H(69E)-C(69')-H(69F) | 109.5     |
| O(41)-C(75')-N(5')   | 123(2) | C(70)-O(40)-Nd(6)    | 126.2(7)  |
| O(41)-C(75')-H(75')  | 118.3  | C(70)-N(4)-C(71)     | 123.2(13) |
| N(5')-C(75')-H(75')  | 118.3  | C(70)-N(4)-C(73)     | 118.8(11) |
| N(5')-C(76')-C(77')  | 122(3) | C(71)-N(4)-C(73)     | 117.9(12) |
| N(5')-C(76')-H(76C)  | 106.8  | O(40)-C(70)-N(4)     | 123.3(11) |
| C(77')-C(76')-H(76C) | 106.8  | O(40)-C(70)-H(70)    | 118.4     |
| N(5')-C(76')-H(76D)  | 106.8  | N(4)-C(70)-H(70)     | 118.4     |
| C(77')-C(76')-H(76D) | 106.8  | N(4)-C(71)-C(72)     | 115.1(15) |
| H(76C)-C(76')-H(76D) | 106.6  | N(4)-C(71)-H(71A)    | 108.5     |
| C(76')-C(77')-H(77D) | 109.5  | C(72)-C(71)-H(71A)   | 108.5     |
| C(76')-C(77')-H(77E) | 109.5  | N(4)-C(71)-H(71B)    | 108.5     |
| H(77D)-C(77')-H(77E) | 109.5  | C(72)-C(71)-H(71B)   | 108.5     |
| C(76')-C(77')-H(77F) | 109.5  | H(71A)-C(71)-H(71B)  | 107.5     |
| H(77D)-C(77')-H(77F) | 109.5  | C(71)-C(72)-H(72A)   | 109.5     |
| H(77E)-C(77')-H(77F) | 109.5  | C(71)-C(72)-H(72B)   | 109.5     |
| N(5')-C(78')-C(79')  | 104(3) | H(72A)-C(72)-H(72B)  | 109.5     |
| N(5')-C(78')-H(78C)  | 111.0  | C(71)-C(72)-H(72C)   | 109.5     |
| C(79')-C(78')-H(78C) | 111.0  | H(72A)-C(72)-H(72C)  | 109.5     |
| N(5')-C(78')-H(78D)  | 111.0  | H(72B)-C(72)-H(72C)  | 109.5     |
| C(79')-C(78')-H(78D) | 111.0  | H(79D)-C(79')-H(79F) | 109.5     |
| H(78C)-C(78')-H(78D) | 109.0  | H(79E)-C(79')-H(79F) | 109.5     |
| C(78')-C(79')-H(79D) | 109.5  | C(55)-O(37)-Nd(1)    | 128.3(17) |
| C(78')-C(79')-H(79E) | 109.5  | C(55')-O(37)-Nd(1)   | 130.8(18) |
| H(79D)-C(79')-H(79E) | 109.5  | C(65')-O(39)-Nd(4)   | 128.8(12) |

|                      |        |                    |           |
|----------------------|--------|--------------------|-----------|
| C(78')-C(79')-H(79F) | 109.5  | C(65)-O(39)-Nd(4)  | 122.9(18) |
| C(75)-O(41)-Nd(5)    | 150(2) | C(75')-O(41)-Nd(5) | 129.3(16) |

Symmetry transformations used to generate equivalent atoms:

#1 x,y,z+1 #2 x,y+1,z #3 x,y-1,z-1 #4 -x+1,-y+1,z-1/2  
 #5 -x+1,-y+2,z-1/2 #6 -x+1,-y+2,z+1/2 #7 x,y+1,z+1  
 #8 -x+3/2,y-1/2,z+1/2 #9 -x+3/2,y-1/2,z-1/2  
 #10 -x+1,-y+1,z+1/2 #11 -x+3/2,y+1/2,z-1/2 #12 -x+3/2,y+1/2,z+1/2  
 #13 x,y-1,z #14 x,y,z-1

---

#### 4

|           |           |             |          |
|-----------|-----------|-------------|----------|
| C(1)-O(2) | 1.241(8)  | C(44)-C(45) | 1.366(9) |
| C(1)-O(1) | 1.263(8)  | C(44)-S(8)  | 1.712(6) |
| C(1)-C(2) | 1.475(8)  | C(45)-C(46) | 1.406(9) |
| C(2)-C(3) | 1.352(10) | C(45)-H(45) | 0.9300   |
| C(2)-S(1) | 1.701(7)  | C(46)-C(47) | 1.357(9) |
| C(3)-C(4) | 1.417(10) | C(46)-H(46) | 0.9300   |
| C(3)-H(3) | 0.9300    | C(47)-C(48) | 1.496(9) |
| C(4)-C(5) | 1.342(10) | C(47)-S(8)  | 1.712(6) |
| C(4)-H(4) | 0.9300    | C(48)-O(31) | 1.222(8) |
| C(5)-C(6) | 1.484(9)  | C(48)-O(32) | 1.253(8) |
| C(5)-S(1) | 1.699(6)  | C(49)-O(33) | 1.250(8) |
| C(6)-O(3) | 1.229(8)  | C(49)-O(34) | 1.250(8) |
| C(6)-O(4) | 1.262(8)  | C(49)-C(50) | 1.496(8) |
| C(7)-O(6) | 1.241(9)  | C(50)-C(51) | 1.359(9) |
| C(7)-O(5) | 1.246(8)  | C(50)-S(9)  | 1.700(6) |
| C(7)-C(8) | 1.489(9)  | C(51)-C(52) | 1.412(9) |

|             |           |               |          |
|-------------|-----------|---------------|----------|
| C(7)-Sm(2)  | 2.944(7)  | C(51)-H(51)   | 0.9300   |
| C(8)-C(9)   | 1.353(10) | C(52)-C(53)   | 1.365(9) |
| C(8)-S(2)   | 1.708(7)  | C(52)-H(52)   | 0.9300   |
| C(9)-C(10)  | 1.419(10) | C(53)-C(54)   | 1.473(9) |
| C(9)-H(9)   | 0.9300    | C(53)-S(9)    | 1.709(6) |
| C(10)-C(11) | 1.336(10) | C(54)-O(36)   | 1.249(8) |
| C(10)-H(10) | 0.9300    | C(54)-O(35)   | 1.249(9) |
| C(11)-C(12) | 1.476(9)  | C(54)-Sm(3)#3 | 3.022(7) |
| C(11)-S(2)  | 1.713(7)  | O(1)-Sm(2)    | 2.385(4) |
| C(12)-O(7)  | 1.231(8)  | O(2)-Sm(1)    | 2.338(4) |
| C(12)-O(8)  | 1.254(8)  | O(3)-Sm(1)#4  | 2.399(4) |
| C(13)-O(9)  | 1.243(9)  | O(4)-Sm(2)#4  | 2.297(4) |
| C(13)-O(10) | 1.261(8)  | O(5)-Sm(1)    | 2.473(4) |
| C(13)-C(14) | 1.481(9)  | O(5)-Sm(2)    | 2.759(5) |
| C(14)-C(15) | 1.342(10) | O(6)-Sm(2)    | 2.421(5) |
| C(14)-S(3)  | 1.707(7)  | O(7)-Sm(1)#5  | 2.344(5) |
| C(15)-C(16) | 1.406(10) | O(8)-Sm(5)#2  | 2.394(4) |
| C(15)-H(15) | 0.9300    | O(9)-Sm(1)    | 2.462(4) |
| C(16)-C(17) | 1.340(10) | O(10)-Sm(2)   | 2.328(4) |
| C(16)-H(16) | 0.9300    | O(11)-Sm(1)#6 | 2.425(5) |
| C(17)-C(18) | 1.497(9)  | O(12)-Sm(5)#7 | 2.294(4) |
| C(17)-S(3)  | 1.689(7)  | O(13)-Sm(2)   | 2.310(4) |
| C(18)-O(12) | 1.248(9)  | O(14)-Sm(3)   | 2.414(4) |
| C(18)-O(11) | 1.253(9)  | O(15)-Sm(5)   | 2.382(4) |
| C(19)-O(14) | 1.246(9)  | O(16)-Sm(6)   | 2.483(4) |
| C(19)-O(13) | 1.257(8)  | O(17)-Sm(2)   | 2.434(4) |
| C(19)-C(20) | 1.488(10) | O(18)-Sm(3)   | 2.312(4) |
| C(20)-C(21) | 1.352(9)  | O(19)-Sm(3)   | 2.655(4) |
| C(20)-S(4)  | 1.707(7)  | O(19)-Sm(2)   | 2.664(4) |
| C(21)-C(22) | 1.407(9)  | O(19)-H(19A)  | 0.84(3)  |
| C(21)-H(21) | 0.9300    | O(19)-H(19B)  | 0.83(3)  |
| C(22)-C(23) | 1.367(9)  | O(20)-Sm(6)#1 | 2.389(4) |
| C(22)-H(22) | 0.9300    | O(20)-Sm(5)#1 | 2.812(4) |
| C(23)-C(24) | 1.480(8)  | O(21)-Sm(3)   | 2.384(4) |
| C(23)-S(4)  | 1.706(6)  | O(22)-Sm(4)   | 2.422(4) |
| C(24)-O(16) | 1.241(8)  | O(23)-Sm(5)#2 | 2.328(4) |

|               |           |                |          |
|---------------|-----------|----------------|----------|
| C(24)-O(15)   | 1.277(8)  | O(23)-Sm(6)#2  | 2.896(5) |
| C(25)-O(17)   | 1.246(8)  | O(24)-Sm(6)#2  | 2.450(5) |
| C(25)-O(18)   | 1.244(8)  | O(25)-Sm(3)    | 2.448(4) |
| C(25)-C(26)   | 1.481(9)  | O(26)-Sm(4)    | 2.366(4) |
| C(26)-C(27)   | 1.354(10) | O(27)-Sm(6)#1  | 2.408(4) |
| C(26)-S(5)    | 1.722(7)  | O(28)-Sm(4)#8  | 2.286(4) |
| C(27)-C(28)   | 1.413(9)  | O(29)-Sm(3)    | 2.356(4) |
| C(27)-H(27)   | 0.9300    | O(29)-Sm(4)    | 2.857(4) |
| C(28)-C(29)   | 1.352(9)  | O(30)-Sm(4)    | 2.470(4) |
| C(28)-H(28)   | 0.9300    | O(31)-Sm(4)#9  | 2.412(4) |
| C(29)-C(30)   | 1.471(8)  | O(32)-Sm(6)    | 2.309(5) |
| C(29)-S(5)    | 1.715(6)  | O(33)-Sm(5)    | 2.378(4) |
| C(30)-O(20)   | 1.255(7)  | O(34)-Sm(6)    | 2.379(4) |
| C(30)-O(43)   | 1.259(8)  | O(35)-Sm(3)#3  | 2.473(5) |
| C(30)-Sm(5)#1 | 3.004(6)  | O(36)-Sm(4)#3  | 2.339(4) |
| C(31)-O(22)   | 1.251(8)  | O(36)-Sm(3)#3  | 2.854(5) |
| C(31)-O(21)   | 1.249(8)  | O(42)-Sm(6)    | 2.585(4) |
| C(31)-C(32)   | 1.490(8)  | O(42)-H(42B)   | 0.84(3)  |
| C(32)-C(33)   | 1.374(9)  | O(42)-H(42A)   | 0.86(3)  |
| C(32)-S(6)    | 1.704(6)  | O(43)-Sm(5)#1  | 2.468(4) |
| C(33)-C(34)   | 1.425(9)  | O(44)-Sm(1)    | 2.540(4) |
| C(33)-H(33)   | 0.9300    | O(44)-H(44A)   | 0.85(3)  |
| C(34)-C(35)   | 1.349(10) | O(44)-H(44B)   | 0.85(3)  |
| C(34)-H(34)   | 0.9300    | Sm(1)-O(7)#6   | 2.344(5) |
| C(35)-C(36)   | 1.474(9)  | Sm(1)-O(3)#10  | 2.399(4) |
| C(35)-S(6)    | 1.710(6)  | Sm(1)-O(11)#5  | 2.425(5) |
| C(36)-O(24)   | 1.250(9)  | Sm(1)-O(37)    | 2.432(4) |
| C(36)-O(23)   | 1.265(8)  | Sm(2)-O(4)#10  | 2.297(4) |
| C(36)-Sm(6)#2 | 3.039(7)  | Sm(3)-O(38)    | 2.463(5) |
| C(37)-O(25)   | 1.260(8)  | Sm(3)-O(35)#7  | 2.473(5) |
| C(37)-O(26)   | 1.262(8)  | Sm(3)-O(36)#7  | 2.854(5) |
| C(37)-C(38)   | 1.470(8)  | Sm(3)-C(54)#7  | 3.022(7) |
| C(38)-C(39)   | 1.357(10) | Sm(4)-O(28)#11 | 2.286(4) |
| C(38)-S(7)    | 1.711(6)  | Sm(4)-O(36)#7  | 2.340(4) |
| C(39)-C(40)   | 1.410(9)  | Sm(4)-O(31)#12 | 2.412(4) |
| C(39)-H(39)   | 0.9300    | Sm(4)-O(39)    | 2.432(5) |

|               |           |                |           |
|---------------|-----------|----------------|-----------|
| C(40)-C(41)   | 1.351(10) | Sm(5)-O(12)#3  | 2.294(4)  |
| C(40)-H(40)   | 0.9300    | Sm(5)-O(23)#13 | 2.328(4)  |
| C(41)-C(42)   | 1.475(9)  | Sm(5)-O(8)#13  | 2.394(4)  |
| C(41)-S(7)    | 1.704(7)  | Sm(5)-O(41)    | 2.421(4)  |
| C(42)-O(27)   | 1.239(8)  | Sm(5)-O(43)#14 | 2.468(4)  |
| C(42)-O(28)   | 1.258(8)  | Sm(5)-O(20)#14 | 2.812(4)  |
| C(43)-O(30)   | 1.255(8)  | Sm(5)-C(30)#14 | 3.004(6)  |
| C(43)-O(29)   | 1.258(8)  | Sm(6)-O(20)#14 | 2.389(4)  |
| C(43)-C(44)   | 1.474(8)  | Sm(6)-O(27)#14 | 2.408(4)  |
| C(43)-Sm(4)   | 3.018(6)  | Sm(6)-O(40)    | 2.447(5)  |
| C(57)-H(57C)  | 0.9600    | Sm(6)-O(24)#13 | 2.450(5)  |
| C(58)-C(59)   | 1.60(3)   | Sm(6)-O(23)#13 | 2.896(5)  |
| C(58)-H(58A)  | 0.9700    | Sm(6)-C(36)#13 | 3.039(7)  |
| C(58)-H(58B)  | 0.9700    | N(1)-C(55)     | 1.39(2)   |
| C(59)-H(59A)  | 0.9600    | N(1)-C(56)     | 1.42(2)   |
| C(59)-H(59B)  | 0.9600    | N(1)-C(58)     | 1.53(2)   |
| C(59)-H(59C)  | 0.9600    | C(55)-O(37)    | 1.22(2)   |
| N(1')-C(55')  | 1.382(19) | C(55)-H(55)    | 0.9300    |
| N(1')-C(56')  | 1.45(2)   | C(56)-C(57)    | 1.50(3)   |
| N(1')-C(58')  | 1.47(2)   | C(56)-H(56A)   | 0.9700    |
| C(55')-O(37)  | 1.17(2)   | C(56)-H(56B)   | 0.9700    |
| C(55')-H(55') | 0.9300    | C(57)-H(57A)   | 0.9600    |
| C(56')-C(57') | 1.47(2)   | C(57)-H(57B)   | 0.9600    |
| C(56')-H(56C) | 0.9700    | C(76)-H(76A)   | 0.9700    |
| C(56')-H(56D) | 0.9700    | C(76)-H(76B)   | 0.9700    |
| C(57')-H(57D) | 0.9600    | C(77)-H(77A)   | 0.9600    |
| C(57')-H(57E) | 0.9600    | C(77)-H(77B)   | 0.9600    |
| C(57')-H(57F) | 0.9600    | C(77)-H(77C)   | 0.9600    |
| C(58')-C(59') | 1.53(2)   | C(78)-C(79)    | 1.52(3)   |
| C(58')-H(58C) | 0.9700    | C(78)-H(78A)   | 0.9700    |
| C(58')-H(58D) | 0.9700    | C(78)-H(78B)   | 0.9700    |
| C(59')-H(59D) | 0.9600    | C(79)-H(79A)   | 0.9600    |
| C(59')-H(59E) | 0.9600    | C(79)-H(79B)   | 0.9600    |
| C(59')-H(59F) | 0.9600    | C(79)-H(79C)   | 0.9600    |
| O(38)-C(60)   | 1.215(9)  | N(5')-C(75')   | 1.353(19) |
| N(2)-C(60)    | 1.341(10) | N(5')-C(76')   | 1.48(2)   |

|              |           |               |           |
|--------------|-----------|---------------|-----------|
| N(2)-C(63)   | 1.467(14) | N(5')-C(78')  | 1.50(2)   |
| N(2)-C(61)   | 1.515(13) | C(75')-O(41)  | 1.154(15) |
| C(60)-H(60)  | 0.9300    | C(75')-H(75') | 0.9300    |
| C(61)-C(62)  | 1.475(18) | C(76')-C(77') | 1.47(2)   |
| C(61)-H(61A) | 0.9700    | C(76')-H(76C) | 0.9700    |
| C(61)-H(61B) | 0.9700    | C(76')-H(76D) | 0.9700    |
| C(62)-H(62A) | 0.9600    | C(77')-H(77D) | 0.9600    |
| C(62)-H(62B) | 0.9600    | C(77')-H(77E) | 0.9600    |
| C(62)-H(624) | 0.9600    | C(77')-H(77F) | 0.9600    |
| C(63)-C(64)  | 1.462(16) | C(78')-C(79') | 1.52(2)   |
| C(63)-H(63A) | 0.9700    | C(78')-H(78C) | 0.9700    |
| C(63)-H(63B) | 0.9700    | C(78')-H(78D) | 0.9700    |
| C(64)-H(64A) | 0.9600    | C(79')-H(79D) | 0.9600    |
| C(64)-H(64B) | 0.9600    | C(79')-H(79E) | 0.9600    |
| C(64)-H(64C) | 0.9600    | C(79')-H(79F) | 0.9600    |
| N(3)-C(65)   | 1.39(2)   | C(69')-H(69E) | 0.9600    |
| N(3)-C(66)   | 1.44(2)   | C(69')-H(69F) | 0.9600    |
| N(3)-C(68)   | 1.489(19) | O(40)-C(70)   | 1.224(8)  |
| C(65)-O(39)  | 1.219(17) | N(4)-C(70)    | 1.313(9)  |
| C(65)-H(65)  | 0.9300    | N(4)-C(71)    | 1.463(12) |
| C(66)-C(67)  | 1.54(2)   | N(4)-C(73)    | 1.478(13) |
| C(66)-H(66A) | 0.9700    | C(70)-H(70)   | 0.9300    |
| C(66)-H(66B) | 0.9700    | C(71)-C(72)   | 1.439(16) |
| C(67)-H(67A) | 0.9600    | C(71)-H(71A)  | 0.9700    |
| C(67)-H(67B) | 0.9600    | C(71)-H(71B)  | 0.9700    |
| C(67)-H(67C) | 0.9600    | C(72)-H(72A)  | 0.9600    |
| C(68)-C(69)  | 1.50(2)   | C(72)-H(72B)  | 0.9600    |
| C(68)-H(68A) | 0.9700    | C(72)-H(72C)  | 0.9600    |
| C(68)-H(68B) | 0.9700    | C(73)-C(74)   | 1.482(16) |
| C(69)-H(69A) | 0.9600    | C(73)-H(73A)  | 0.9700    |
| C(69)-H(69B) | 0.9600    | C(73)-H(73B)  | 0.9700    |
| C(69)-H(69C) | 0.9600    | C(74)-H(74A)  | 0.9600    |
| N(3')-C(65') | 1.381(18) | C(74)-H(74B)  | 0.9600    |
| N(3')-C(68') | 1.457(17) | C(74)-H(74C)  | 0.9600    |
| N(3')-C(66') | 1.471(18) | N(5)-C(75)    | 1.45(2)   |
| C(65')-O(39) | 1.221(14) | N(5)-C(76)    | 1.45(3)   |



|                 |          |                     |          |
|-----------------|----------|---------------------|----------|
| C(65')-H(65')   | 0.9300   | N(5)-C(78)          | 1.52(3)  |
| C(66')-C(67')   | 1.53(2)  | C(75)-O(41)         | 1.15(2)  |
| C(66')-H(66C)   | 0.9700   | C(75)-H(75)         | 0.9300   |
| C(66')-H(66D)   | 0.9700   | C(76)-C(77)         | 1.52(3)  |
| C(67')-H(67D)   | 0.9600   | C(68')-H(68C)       | 0.9700   |
| C(67')-H(67E)   | 0.9600   | C(68')-H(68D)       | 0.9700   |
| C(67')-H(67F)   | 0.9600   | C(69')-H(69D)       | 0.9600   |
| C(68')-C(69')   | 1.54(2)  | C(29)-C(30)-Sm(5)#1 | 167.1(4) |
| O(2)-C(1)-O(1)  | 125.5(6) | O(22)-C(31)-O(21)   | 126.9(6) |
| O(2)-C(1)-C(2)  | 115.9(6) | O(22)-C(31)-C(32)   | 116.4(6) |
| O(1)-C(1)-C(2)  | 118.5(6) | O(21)-C(31)-C(32)   | 116.7(6) |
| C(3)-C(2)-C(1)  | 125.8(6) | C(33)-C(32)-C(31)   | 126.1(6) |
| C(3)-C(2)-S(1)  | 111.6(5) | C(33)-C(32)-S(6)    | 112.1(5) |
| C(1)-C(2)-S(1)  | 122.6(5) | C(31)-C(32)-S(6)    | 121.6(5) |
| C(2)-C(3)-C(4)  | 112.6(7) | C(32)-C(33)-C(34)   | 111.5(6) |
| C(2)-C(3)-H(3)  | 123.7    | C(32)-C(33)-H(33)   | 124.2    |
| C(4)-C(3)-H(3)  | 123.7    | C(34)-C(33)-H(33)   | 124.2    |
| C(5)-C(4)-C(3)  | 111.8(7) | C(35)-C(34)-C(33)   | 112.4(6) |
| C(5)-C(4)-H(4)  | 124.1    | C(35)-C(34)-H(34)   | 123.8    |
| C(3)-C(4)-H(4)  | 124.1    | C(33)-C(34)-H(34)   | 123.8    |
| C(4)-C(5)-C(6)  | 127.1(6) | C(34)-C(35)-C(36)   | 127.8(6) |
| C(4)-C(5)-S(1)  | 112.5(5) | C(34)-C(35)-S(6)    | 112.5(5) |
| C(6)-C(5)-S(1)  | 120.3(5) | C(36)-C(35)-S(6)    | 119.7(5) |
| O(3)-C(6)-O(4)  | 125.5(6) | O(24)-C(36)-O(23)   | 121.6(6) |
| O(3)-C(6)-C(5)  | 118.0(6) | O(24)-C(36)-C(35)   | 119.6(6) |
| O(4)-C(6)-C(5)  | 116.4(6) | O(23)-C(36)-C(35)   | 118.8(7) |
| O(6)-C(7)-O(5)  | 122.5(6) | O(24)-C(36)-Sm(6)#2 | 50.9(3)  |
| O(6)-C(7)-C(8)  | 118.2(6) | O(23)-C(36)-Sm(6)#2 | 71.4(4)  |
| O(5)-C(7)-C(8)  | 119.3(7) | C(35)-C(36)-Sm(6)#2 | 166.9(5) |
| O(6)-C(7)-Sm(2) | 53.5(3)  | O(25)-C(37)-O(26)   | 125.7(6) |
| O(5)-C(7)-Sm(2) | 69.2(4)  | O(25)-C(37)-C(38)   | 117.7(6) |
| C(8)-C(7)-Sm(2) | 170.4(5) | O(26)-C(37)-C(38)   | 116.5(6) |
| C(9)-C(8)-C(7)  | 129.0(6) | C(39)-C(38)-C(37)   | 128.5(6) |
| C(9)-C(8)-S(2)  | 111.4(5) | C(39)-C(38)-S(7)    | 111.4(5) |
| C(7)-C(8)-S(2)  | 119.6(5) | C(37)-C(38)-S(7)    | 120.1(5) |
| C(8)-C(9)-C(10) | 112.3(7) | C(38)-C(39)-C(40)   | 112.2(6) |

|                   |          |                   |          |
|-------------------|----------|-------------------|----------|
| C(8)-C(9)-H(9)    | 123.8    | C(38)-C(39)-H(39) | 123.9    |
| C(10)-C(9)-H(9)   | 123.8    | C(40)-C(39)-H(39) | 123.9    |
| C(11)-C(10)-C(9)  | 112.9(7) | C(41)-C(40)-C(39) | 113.1(6) |
| C(11)-C(10)-H(10) | 123.5    | C(41)-C(40)-H(40) | 123.5    |
| C(9)-C(10)-H(10)  | 123.5    | C(39)-C(40)-H(40) | 123.5    |
| C(10)-C(11)-C(12) | 126.4(6) | C(40)-C(41)-C(42) | 127.3(6) |
| C(10)-C(11)-S(2)  | 111.6(5) | C(40)-C(41)-S(7)  | 111.4(5) |
| C(12)-C(11)-S(2)  | 122.0(5) | C(42)-C(41)-S(7)  | 121.2(5) |
| O(7)-C(12)-O(8)   | 125.4(6) | O(27)-C(42)-O(28) | 125.3(6) |
| O(7)-C(12)-C(11)  | 117.0(7) | O(27)-C(42)-C(41) | 119.3(6) |
| O(8)-C(12)-C(11)  | 117.6(6) | O(28)-C(42)-C(41) | 115.4(6) |
| O(9)-C(13)-O(10)  | 127.5(6) | O(30)-C(43)-O(29) | 122.9(6) |
| O(9)-C(13)-C(14)  | 117.6(6) | O(30)-C(43)-C(44) | 118.3(6) |
| O(10)-C(13)-C(14) | 115.0(6) | O(29)-C(43)-C(44) | 118.8(6) |
| C(15)-C(14)-C(13) | 128.3(7) | O(30)-C(43)-Sm(4) | 52.7(3)  |
| C(15)-C(14)-S(3)  | 110.3(5) | O(29)-C(43)-Sm(4) | 70.5(3)  |
| C(13)-C(14)-S(3)  | 121.2(5) | C(44)-C(43)-Sm(4) | 168.6(5) |
| C(14)-C(15)-C(16) | 113.3(7) | C(45)-C(44)-C(43) | 127.0(6) |
| C(14)-C(15)-H(15) | 123.4    | C(45)-C(44)-S(8)  | 111.5(5) |
| C(16)-C(15)-H(15) | 123.4    | C(43)-C(44)-S(8)  | 121.5(5) |
| C(17)-C(16)-C(15) | 112.7(7) | C(44)-C(45)-C(46) | 112.2(6) |
| C(17)-C(16)-H(16) | 123.7    | C(44)-C(45)-H(45) | 123.9    |
| C(15)-C(16)-H(16) | 123.7    | C(46)-C(45)-H(45) | 123.9    |
| C(16)-C(17)-C(18) | 127.0(7) | C(47)-C(46)-C(45) | 113.1(6) |
| C(16)-C(17)-S(3)  | 111.3(5) | C(47)-C(46)-H(46) | 123.4    |
| C(18)-C(17)-S(3)  | 121.4(5) | C(45)-C(46)-H(46) | 123.4    |
| O(12)-C(18)-O(11) | 126.3(6) | C(46)-C(47)-C(48) | 125.4(6) |
| O(12)-C(18)-C(17) | 115.4(7) | C(46)-C(47)-S(8)  | 111.4(5) |
| O(11)-C(18)-C(17) | 118.3(6) | C(48)-C(47)-S(8)  | 123.0(5) |
| O(14)-C(19)-O(13) | 126.2(6) | O(31)-C(48)-O(32) | 126.6(6) |
| O(14)-C(19)-C(20) | 118.1(6) | O(31)-C(48)-C(47) | 119.6(6) |
| O(13)-C(19)-C(20) | 115.6(6) | O(32)-C(48)-C(47) | 113.7(6) |
| C(21)-C(20)-C(19) | 127.2(6) | O(33)-C(49)-O(34) | 127.0(6) |
| C(21)-C(20)-S(4)  | 111.4(5) | O(33)-C(49)-C(50) | 117.2(6) |
| C(19)-C(20)-S(4)  | 121.3(5) | O(34)-C(49)-C(50) | 115.8(6) |
| C(20)-C(21)-C(22) | 113.6(6) | C(51)-C(50)-C(49) | 126.7(6) |

|                       |            |                     |            |
|-----------------------|------------|---------------------|------------|
| C(20)-C(21)-H(21)     | 123.2      | C(51)-C(50)-S(9)    | 112.1(5)   |
| C(22)-C(21)-H(21)     | 123.2      | C(49)-C(50)-S(9)    | 121.2(5)   |
| C(23)-C(22)-C(21)     | 111.3(6)   | C(50)-C(51)-C(52)   | 112.4(6)   |
| C(23)-C(22)-H(22)     | 124.3      | C(50)-C(51)-H(51)   | 123.8      |
| C(21)-C(22)-H(22)     | 124.3      | C(52)-C(51)-H(51)   | 123.8      |
| C(22)-C(23)-C(24)     | 128.5(6)   | C(53)-C(52)-C(51)   | 112.2(6)   |
| C(22)-C(23)-S(4)      | 112.1(5)   | C(53)-C(52)-H(52)   | 123.9      |
| C(24)-C(23)-S(4)      | 119.3(5)   | C(51)-C(52)-H(52)   | 123.9      |
| O(16)-C(24)-O(15)     | 124.8(6)   | C(52)-C(53)-C(54)   | 128.0(6)   |
| O(16)-C(24)-C(23)     | 119.3(6)   | C(52)-C(53)-S(9)    | 111.7(5)   |
| O(15)-C(24)-C(23)     | 115.7(6)   | C(54)-C(53)-S(9)    | 120.3(5)   |
| O(17)-C(25)-O(18)     | 125.0(6)   | O(36)-C(54)-O(35)   | 122.2(6)   |
| O(17)-C(25)-C(26)     | 120.8(6)   | O(36)-C(54)-C(53)   | 119.3(6)   |
| O(18)-C(25)-C(26)     | 114.3(6)   | O(35)-C(54)-C(53)   | 118.5(6)   |
| C(27)-C(26)-C(25)     | 124.8(6)   | O(36)-C(54)-Sm(3)#3 | 70.3(4)    |
| C(27)-C(26)-S(5)      | 110.4(5)   | O(35)-C(54)-Sm(3)#3 | 52.7(3)    |
| C(25)-C(26)-S(5)      | 124.7(5)   | C(53)-C(54)-Sm(3)#3 | 167.4(5)   |
| C(26)-C(27)-C(28)     | 113.7(6)   | C(1)-O(1)-Sm(2)     | 128.3(4)   |
| C(26)-C(27)-H(27)     | 123.2      | C(1)-O(2)-Sm(1)     | 147.3(5)   |
| C(28)-C(27)-H(27)     | 123.2      | C(6)-O(3)-Sm(1)#4   | 117.3(4)   |
| C(29)-C(28)-C(27)     | 112.5(6)   | C(6)-O(4)-Sm(2)#4   | 165.6(5)   |
| C(29)-C(28)-H(28)     | 123.8      | C(7)-O(5)-Sm(1)     | 165.4(5)   |
| C(27)-C(28)-H(28)     | 123.8      | C(7)-O(5)-Sm(2)     | 85.8(4)    |
| C(28)-C(29)-C(30)     | 126.8(6)   | Sm(1)-O(5)-Sm(2)    | 107.66(15) |
| C(28)-C(29)-S(5)      | 111.4(5)   | C(7)-O(6)-Sm(2)     | 102.2(4)   |
| C(30)-C(29)-S(5)      | 121.8(5)   | C(12)-O(7)-Sm(1)#5  | 169.2(5)   |
| O(20)-C(30)-O(43)     | 121.7(5)   | C(12)-O(8)-Sm(5)#2  | 132.8(4)   |
| O(20)-C(30)-C(29)     | 120.2(6)   | C(13)-O(9)-Sm(1)    | 143.3(4)   |
| O(43)-C(30)-C(29)     | 118.1(5)   | C(13)-O(10)-Sm(2)   | 133.3(5)   |
| O(20)-C(30)-Sm(5)#1   | 69.1(3)    | C(18)-O(11)-Sm(1)#6 | 123.3(4)   |
| O(43)-C(30)-Sm(5)#1   | 53.3(3)    | C(18)-O(12)-Sm(5)#7 | 144.0(5)   |
| C(36)-O(23)-Sm(6)#2   | 84.1(4)    | C(19)-O(13)-Sm(2)   | 141.7(5)   |
| Sm(5)#2-O(23)-Sm(6)#2 | 103.16(15) | C(19)-O(14)-Sm(3)   | 131.8(4)   |
| C(36)-O(24)-Sm(6)#2   | 105.8(4)   | C(24)-O(15)-Sm(5)   | 133.2(4)   |
| C(37)-O(25)-Sm(3)     | 138.0(4)   | C(24)-O(16)-Sm(6)   | 140.5(4)   |
| C(37)-O(26)-Sm(4)     | 134.2(4)   | C(25)-O(17)-Sm(2)   | 129.5(4)   |

|                       |            |                       |            |
|-----------------------|------------|-----------------------|------------|
| C(42)-O(27)-Sm(6)#1   | 134.4(4)   | C(25)-O(18)-Sm(3)     | 167.6(5)   |
| C(42)-O(28)-Sm(4)#8   | 147.9(4)   | Sm(3)-O(19)-Sm(2)     | 124.35(13) |
| C(43)-O(29)-Sm(3)     | 170.5(4)   | Sm(3)-O(19)-H(19A)    | 94(5)      |
| C(43)-O(29)-Sm(4)     | 84.9(4)    | Sm(2)-O(19)-H(19A)    | 110(6)     |
| Sm(3)-O(29)-Sm(4)     | 104.47(14) | Sm(3)-O(19)-H(19B)    | 110(5)     |
| C(43)-O(30)-Sm(4)     | 103.4(4)   | Sm(2)-O(19)-H(19B)    | 106(5)     |
| C(48)-O(31)-Sm(4)#9   | 134.1(4)   | H(19A)-O(19)-H(19B)   | 112(4)     |
| C(48)-O(32)-Sm(6)     | 162.0(5)   | C(30)-O(20)-Sm(6)#1   | 169.7(4)   |
| C(49)-O(33)-Sm(5)     | 134.5(4)   | C(30)-O(20)-Sm(5)#1   | 86.3(3)    |
| C(49)-O(34)-Sm(6)     | 138.1(4)   | Sm(6)#1-O(20)-Sm(5)#1 | 104.03(14) |
| C(54)-O(35)-Sm(3)#3   | 103.6(4)   | C(31)-O(21)-Sm(3)     | 136.7(4)   |
| C(54)-O(36)-Sm(4)#3   | 169.1(4)   | C(31)-O(22)-Sm(4)     | 134.9(4)   |
| C(54)-O(36)-Sm(3)#3   | 85.4(4)    | C(36)-O(23)-Sm(5)#2   | 167.9(5)   |
| Sm(4)#3-O(36)-Sm(3)#3 | 105.01(14) | O(2)-Sm(1)-O(11)#5    | 81.57(17)  |
| Sm(6)-O(42)-H(42B)    | 118(4)     | O(7)#6-Sm(1)-O(11)#5  | 99.36(19)  |
| Sm(6)-O(42)-H(42A)    | 128(6)     | O(3)#10-Sm(1)-O(11)#5 | 145.84(18) |
| H(42B)-O(42)-H(42A)   | 110(4)     | O(2)-Sm(1)-O(37)      | 138.7(2)   |
| C(30)-O(43)-Sm(5)#1   | 102.5(4)   | O(7)#6-Sm(1)-O(37)    | 78.2(2)    |
| Sm(1)-O(44)-H(44A)    | 126(6)     | O(3)#10-Sm(1)-O(37)   | 136.9(2)   |
| Sm(1)-O(44)-H(44B)    | 109(5)     | O(11)#5-Sm(1)-O(37)   | 71.5(2)    |
| H(44A)-O(44)-H(44B)   | 109(4)     | O(2)-Sm(1)-O(9)       | 118.98(15) |
| C(5)-S(1)-C(2)        | 91.5(3)    | O(7)#6-Sm(1)-O(9)     | 86.51(17)  |
| C(8)-S(2)-C(11)       | 91.7(3)    | O(3)#10-Sm(1)-O(9)    | 73.16(17)  |
| C(17)-S(3)-C(14)      | 92.5(3)    | O(11)#5-Sm(1)-O(9)    | 140.85(18) |
| C(23)-S(4)-C(20)      | 91.5(3)    | O(37)-Sm(1)-O(9)      | 71.96(19)  |
| C(29)-S(5)-C(26)      | 92.0(3)    | O(2)-Sm(1)-O(5)       | 68.72(16)  |
| C(32)-S(6)-C(35)      | 91.4(3)    | O(7)#6-Sm(1)-O(5)     | 152.91(19) |
| C(41)-S(7)-C(38)      | 91.8(3)    | O(3)#10-Sm(1)-O(5)    | 113.42(15) |
| C(47)-S(8)-C(44)      | 91.7(3)    | O(11)#5-Sm(1)-O(5)    | 87.09(16)  |
| C(50)-S(9)-C(53)      | 91.6(3)    | O(37)-Sm(1)-O(5)      | 78.99(18)  |
| O(2)-Sm(1)-O(7)#6     | 138.09(19) | O(9)-Sm(1)-O(5)       | 72.58(15)  |
| O(2)-Sm(1)-O(3)#10    | 81.21(18)  | O(2)-Sm(1)-O(44)      | 68.11(16)  |
| O(7)#6-Sm(1)-O(3)#10  | 75.06(19)  | O(7)#6-Sm(1)-O(44)    | 71.71(19)  |
| O(1)-Sm(2)-C(7)       | 75.06(19)  | O(3)#10-Sm(1)-O(44)   | 71.22(18)  |
| O(6)-Sm(2)-C(7)       | 24.34(18)  | O(11)#5-Sm(1)-O(44)   | 75.03(18)  |
| O(17)-Sm(2)-C(7)      | 162.56(19) | O(37)-Sm(1)-O(44)     | 129.97(16) |

|                     |            |                      |            |
|---------------------|------------|----------------------|------------|
| O(19)-Sm(2)-C(7)    | 82.95(18)  | O(9)-Sm(1)-O(44)     | 141.89(18) |
| O(5)-Sm(2)-C(7)     | 24.96(17)  | O(5)-Sm(1)-O(44)     | 135.10(17) |
| O(18)-Sm(3)-O(29)   | 151.43(17) | O(4)#10-Sm(2)-O(13)  | 136.91(18) |
| O(18)-Sm(3)-O(21)   | 134.86(17) | O(4)#10-Sm(2)-O(10)  | 78.35(18)  |
| O(29)-Sm(3)-O(21)   | 73.31(15)  | O(13)-Sm(2)-O(10)    | 138.41(17) |
| O(18)-Sm(3)-O(14)   | 92.52(18)  | O(4)#10-Sm(2)-O(1)   | 80.02(16)  |
| O(29)-Sm(3)-O(14)   | 89.84(15)  | O(13)-Sm(2)-O(1)     | 79.16(16)  |
| O(21)-Sm(3)-O(14)   | 77.07(17)  | O(10)-Sm(2)-O(1)     | 138.24(16) |
| O(18)-Sm(3)-O(25)   | 84.49(16)  | O(4)#10-Sm(2)-O(6)   | 133.45(17) |
| O(29)-Sm(3)-O(25)   | 76.64(14)  | O(13)-Sm(2)-O(6)     | 80.06(17)  |
| O(21)-Sm(3)-O(25)   | 129.15(15) | O(10)-Sm(2)-O(6)     | 87.08(19)  |
| O(14)-Sm(3)-O(25)   | 142.76(16) | O(1)-Sm(2)-O(6)      | 82.49(18)  |
| O(18)-Sm(3)-O(38)   | 73.31(18)  | O(4)#10-Sm(2)-O(17)  | 77.81(16)  |
| O(29)-Sm(3)-O(38)   | 80.76(16)  | O(13)-Sm(2)-O(17)    | 82.22(17)  |
| O(21)-Sm(3)-O(38)   | 138.02(16) | O(10)-Sm(2)-O(17)    | 87.11(17)  |
| O(14)-Sm(3)-O(38)   | 70.32(17)  | O(1)-Sm(2)-O(17)     | 122.32(18) |
| O(25)-Sm(3)-O(38)   | 73.30(16)  | O(6)-Sm(2)-O(17)     | 145.84(16) |
| O(18)-Sm(3)-O(35)#7 | 72.78(18)  | O(4)#10-Sm(2)-O(19)  | 139.52(17) |
| O(29)-Sm(3)-O(35)#7 | 123.00(15) | O(13)-Sm(2)-O(19)    | 72.76(15)  |
| O(21)-Sm(3)-O(35)#7 | 84.32(17)  | O(10)-Sm(2)-O(19)    | 65.96(15)  |
| O(14)-Sm(3)-O(35)#7 | 135.47(16) | O(1)-Sm(2)-O(19)     | 139.93(17) |
| O(25)-Sm(3)-O(35)#7 | 78.88(16)  | O(6)-Sm(2)-O(19)     | 65.14(17)  |
| O(38)-Sm(3)-O(35)#7 | 137.65(17) | O(17)-Sm(2)-O(19)    | 81.81(16)  |
| O(18)-Sm(3)-O(19)   | 67.72(16)  | O(4)#10-Sm(2)-O(5)   | 84.27(16)  |
| O(29)-Sm(3)-O(19)   | 138.99(15) | O(13)-Sm(2)-O(5)     | 123.46(15) |
| O(21)-Sm(3)-O(19)   | 67.37(15)  | O(10)-Sm(2)-O(5)     | 70.71(16)  |
| O(14)-Sm(3)-O(19)   | 70.76(16)  | O(1)-Sm(2)-O(5)      | 71.94(15)  |
| O(25)-Sm(3)-O(19)   | 139.01(16) | O(6)-Sm(2)-O(5)      | 49.26(15)  |
| O(38)-Sm(3)-O(19)   | 122.35(14) | O(17)-Sm(2)-O(5)     | 153.94(15) |
| O(35)#7-Sm(3)-O(19) | 64.75(16)  | O(19)-Sm(2)-O(5)     | 100.52(13) |
| O(18)-Sm(3)-O(36)#7 | 115.62(15) | O(4)#10-Sm(2)-C(7)   | 109.12(19) |
| O(29)-Sm(3)-O(36)#7 | 75.16(13)  | O(13)-Sm(2)-C(7)     | 101.28(18) |
| O(21)-Sm(3)-O(36)#7 | 68.76(14)  | O(10)-Sm(2)-C(7)     | 78.95(19)  |
| O(14)-Sm(3)-O(36)#7 | 145.32(15) | O(28)#11-Sm(4)-O(22) | 88.52(15)  |
| O(25)-Sm(3)-O(36)#7 | 64.41(14)  | O(36)#7-Sm(4)-O(22)  | 81.05(15)  |
| O(38)-Sm(3)-O(36)#7 | 134.91(15) | O(26)-Sm(4)-O(22)    | 131.44(15) |

|                         |            |                        |            |
|-------------------------|------------|------------------------|------------|
| O(35)#7-Sm(3)-O(36)#7   | 47.84(14)  | O(31)#12-Sm(4)-O(22)   | 143.07(17) |
| O(19)-Sm(3)-O(36)#7     | 100.33(12) | O(28)#11-Sm(4)-O(39)   | 78.75(17)  |
| O(18)-Sm(3)-C(54)#7     | 93.06(19)  | O(36)#7-Sm(4)-O(39)    | 77.88(17)  |
| O(29)-Sm(3)-C(54)#7     | 99.41(17)  | O(26)-Sm(4)-O(39)      | 139.11(17) |
| O(21)-Sm(3)-C(54)#7     | 77.51(17)  | O(31)#12-Sm(4)-O(39)   | 70.36(19)  |
| O(14)-Sm(3)-C(54)#7     | 149.10(18) | O(22)-Sm(4)-O(39)      | 72.75(17)  |
| O(25)-Sm(3)-C(54)#7     | 68.09(17)  | O(28)#11-Sm(4)-O(30)   | 74.54(16)  |
| O(38)-Sm(3)-C(54)#7     | 140.11(18) | O(36)#7-Sm(4)-O(30)    | 123.49(15) |
| O(35)#7-Sm(3)-C(54)#7   | 23.69(17)  | O(26)-Sm(4)-O(30)      | 79.47(17)  |
| O(19)-Sm(3)-C(54)#7     | 83.39(17)  | O(31)#12-Sm(4)-O(30)   | 133.50(17) |
| O(36)#7-Sm(3)-C(54)#7   | 24.33(16)  | O(22)-Sm(4)-O(30)      | 79.18(16)  |
| O(28)#11-Sm(4)-O(36)#7  | 156.33(16) | O(39)-Sm(4)-O(30)      | 141.42(17) |
| O(28)#11-Sm(4)-O(26)    | 126.18(16) | O(28)#11-Sm(4)-O(29)   | 119.49(14) |
| O(36)#7-Sm(4)-O(26)     | 75.44(16)  | O(36)#7-Sm(4)-O(29)    | 75.33(14)  |
| O(28)#11-Sm(4)-O(31)#12 | 85.95(17)  | O(26)-Sm(4)-O(29)      | 67.38(14)  |
| O(36)#7-Sm(4)-O(31)#12  | 89.71(15)  | O(31)#12-Sm(4)-O(29)   | 145.63(16) |
| O(26)-Sm(4)-O(31)#12    | 79.05(17)  | O(22)-Sm(4)-O(29)      | 65.80(14)  |
| O(32)-Sm(6)-O(23)#13    | 117.71(15) | O(39)-Sm(4)-O(29)      | 133.25(16) |
| O(34)-Sm(6)-O(23)#13    | 69.05(15)  | O(30)-Sm(4)-O(29)      | 48.28(13)  |
| O(20)#14-Sm(6)-O(23)#13 | 75.10(14)  | O(28)#11-Sm(4)-C(43)   | 96.24(17)  |
| O(27)#14-Sm(6)-O(23)#13 | 146.47(15) | O(36)#7-Sm(4)-C(43)    | 99.85(17)  |
| O(40)-Sm(6)-O(23)#13    | 130.97(15) | O(26)-Sm(4)-C(43)      | 73.46(16)  |
| O(24)#13-Sm(6)-O(23)#13 | 47.59(14)  | O(31)#12-Sm(4)-C(43)   | 147.40(18) |
| O(16)-Sm(6)-O(23)#13    | 63.77(14)  | O(22)-Sm(4)-C(43)      | 69.51(16)  |
| O(42)-Sm(6)-O(23)#13    | 100.65(16) | O(39)-Sm(4)-C(43)      | 142.05(18) |
| O(32)-Sm(6)-C(36)#13    | 94.45(19)  | O(30)-Sm(4)-C(43)      | 23.85(17)  |
| O(34)-Sm(6)-C(36)#13    | 80.77(17)  | O(29)-Sm(4)-C(43)      | 24.52(15)  |
| O(20)#14-Sm(6)-C(36)#13 | 99.11(17)  | O(12)#3-Sm(5)-O(23)#13 | 163.91(17) |
| O(27)#14-Sm(6)-C(36)#13 | 152.58(19) | O(12)#3-Sm(5)-O(33)    | 99.19(16)  |
| O(40)-Sm(6)-C(36)#13    | 136.40(18) | O(23)#13-Sm(5)-O(33)   | 81.96(16)  |
| O(24)#13-Sm(6)-C(36)#13 | 23.32(18)  | O(12)#3-Sm(5)-O(15)    | 111.63(16) |
| O(16)-Sm(6)-C(36)#13    | 65.19(17)  | O(23)#13-Sm(5)-O(15)   | 77.34(16)  |
| O(42)-Sm(6)-C(36)#13    | 85.5(2)    | O(33)-Sm(5)-O(15)      | 134.27(16) |
| O(23)#13-Sm(6)-C(36)#13 | 24.46(16)  | O(12)#3-Sm(5)-O(8)#13  | 80.98(16)  |
| C(55)-N(1)-C(56)        | 119.7(19)  | O(23)#13-Sm(5)-O(8)#13 | 88.88(16)  |
| C(55)-N(1)-C(58)        | 112.1(18)  | O(33)-Sm(5)-O(8)#13    | 144.91(16) |

|                     |           |                         |            |
|---------------------|-----------|-------------------------|------------|
| C(56)-N(1)-C(58)    | 128(2)    | O(15)-Sm(5)-O(8)#13     | 75.14(17)  |
| O(37)-C(55)-N(1)    | 122(2)    | O(12)#3-Sm(5)-O(41)     | 78.9(2)    |
| O(37)-C(55)-H(55)   | 119.2     | O(23)#13-Sm(5)-O(41)    | 86.2(2)    |
| N(1)-C(55)-H(55)    | 119.2     | O(33)-Sm(5)-O(41)       | 73.0(2)    |
| N(1)-C(56)-C(57)    | 116(2)    | O(15)-Sm(5)-O(41)       | 144.0(3)   |
| N(1)-C(56)-H(56A)   | 108.4     | O(8)#13-Sm(5)-O(41)     | 72.7(2)    |
| C(57)-C(56)-H(56A)  | 108.4     | O(12)#3-Sm(5)-O(43)#14  | 69.82(16)  |
| N(1)-C(56)-H(56B)   | 108.4     | O(23)#13-Sm(5)-O(43)#14 | 126.02(16) |
| C(57)-C(56)-H(56B)  | 108.4     | O(33)-Sm(5)-O(43)#14    | 81.85(16)  |
| H(56A)-C(56)-H(56B) | 107.4     | O(15)-Sm(5)-O(43)#14    | 78.34(17)  |
| C(56)-C(57)-H(57A)  | 109.5     | O(8)#13-Sm(5)-O(43)#14  | 129.27(16) |
| C(56)-C(57)-H(57B)  | 109.5     | O(41)-Sm(5)-O(43)#14    | 135.7(3)   |
| H(57A)-C(57)-H(57B) | 109.5     | O(12)#3-Sm(5)-O(20)#14  | 117.67(14) |
| C(56)-C(57)-H(57C)  | 109.5     | O(23)#13-Sm(5)-O(20)#14 | 77.69(15)  |
| H(57A)-C(57)-H(57C) | 109.5     | O(33)-Sm(5)-O(20)#14    | 67.06(14)  |
| H(57B)-C(57)-H(57C) | 109.5     | O(15)-Sm(5)-O(20)#14    | 68.89(14)  |
| N(1)-C(58)-C(59)    | 104(2)    | O(8)#13-Sm(5)-O(20)#14  | 143.51(16) |
| N(1)-C(58)-H(58A)   | 111.1     | O(41)-Sm(5)-O(20)#14    | 138.49(18) |
| C(59)-C(58)-H(58A)  | 111.1     | O(43)#14-Sm(5)-O(20)#14 | 48.61(13)  |
| N(1)-C(58)-H(58B)   | 111.1     | O(12)#3-Sm(5)-C(30)#14  | 93.14(17)  |
| C(59)-C(58)-H(58B)  | 111.1     | O(23)#13-Sm(5)-C(30)#14 | 102.33(17) |
| H(58A)-C(58)-H(58B) | 109.0     | O(33)-Sm(5)-C(30)#14    | 71.04(16)  |
| C(58)-C(59)-H(59A)  | 109.5     | O(15)-Sm(5)-C(30)#14    | 74.23(16)  |
| C(58)-C(59)-H(59B)  | 109.5     | O(8)#13-Sm(5)-C(30)#14  | 144.00(17) |
| H(59A)-C(59)-H(59B) | 109.5     | O(41)-Sm(5)-C(30)#14    | 141.3(2)   |
| C(58)-C(59)-H(59C)  | 109.5     | O(43)#14-Sm(5)-C(30)#14 | 24.16(16)  |
| H(59A)-C(59)-H(59C) | 109.5     | O(20)#14-Sm(5)-C(30)#14 | 24.64(15)  |
| H(59B)-C(59)-H(59C) | 109.5     | O(32)-Sm(6)-O(34)       | 138.44(18) |
| C(55')-N(1')-C(56') | 119.6(18) | O(32)-Sm(6)-O(20)#14    | 148.80(18) |
| C(55')-N(1')-C(58') | 116.6(17) | O(34)-Sm(6)-O(20)#14    | 71.87(16)  |
| C(56')-N(1')-C(58') | 119(2)    | O(32)-Sm(6)-O(27)#14    | 90.39(18)  |
| O(37)-C(55')-N(1')  | 123(2)    | O(34)-Sm(6)-O(27)#14    | 77.80(18)  |
| O(37)-C(55')-H(55') | 118.7     | O(20)#14-Sm(6)-O(27)#14 | 90.30(15)  |
| N(1')-C(55')-H(55') | 118.7     | O(32)-Sm(6)-O(40)       | 75.43(19)  |
| N(1')-C(56')-C(57') | 116(2)    | O(34)-Sm(6)-O(40)       | 133.96(16) |
| N(1')-C(56')-H(56C) | 108.2     | O(20)#14-Sm(6)-O(40)    | 75.37(16)  |

|                      |           |                         |            |
|----------------------|-----------|-------------------------|------------|
| C(57')-C(56')-H(56C) | 108.2     | O(27)#14-Sm(6)-O(40)    | 70.88(17)  |
| N(1')-C(56')-H(56D)  | 108.2     | O(32)-Sm(6)-O(24)#13    | 73.74(18)  |
| C(57')-C(56')-H(56D) | 108.2     | O(34)-Sm(6)-O(24)#13    | 89.68(19)  |
| H(56C)-C(56')-H(56D) | 107.3     | O(20)#14-Sm(6)-O(24)#13 | 122.43(16) |
| C(56')-C(57')-H(57D) | 109.5     | O(27)#14-Sm(6)-O(24)#13 | 139.46(17) |
| C(56')-C(57')-H(57E) | 109.5     | O(40)-Sm(6)-O(24)#13    | 135.67(18) |
| H(57D)-C(57')-H(57E) | 109.5     | O(32)-Sm(6)-O(16)       | 84.63(16)  |
| C(56')-C(57')-H(57F) | 109.5     | O(34)-Sm(6)-O(16)       | 127.96(15) |
| H(57D)-C(57')-H(57F) | 109.5     | O(20)#14-Sm(6)-O(16)    | 75.95(14)  |
| H(57E)-C(57')-H(57F) | 109.5     | O(27)#14-Sm(6)-O(16)    | 142.22(16) |
| N(1')-C(58')-C(59')  | 110.0(19) | O(40)-Sm(6)-O(16)       | 71.62(16)  |
| N(1')-C(58')-H(58C)  | 109.7     | O(24)#13-Sm(6)-O(16)    | 74.47(16)  |
| C(59')-C(58')-H(58C) | 109.7     | O(32)-Sm(6)-O(42)       | 69.4(2)    |
| N(1')-C(58')-H(58D)  | 109.6     | O(34)-Sm(6)-O(42)       | 69.04(18)  |
| C(59')-C(58')-H(58D) | 109.7     | O(20)#14-Sm(6)-O(42)    | 139.30(18) |
| H(58C)-C(58')-H(58D) | 108.2     | O(27)#14-Sm(6)-O(42)    | 70.96(18)  |
| C(58')-C(59')-H(59D) | 109.5     | O(40)-Sm(6)-O(42)       | 126.97(18) |
| C(58')-C(59')-H(59E) | 109.5     | O(24)#13-Sm(6)-O(42)    | 68.55(19)  |
| H(59D)-C(59')-H(59E) | 109.5     | O(16)-Sm(6)-O(42)       | 139.31(18) |
| C(58')-C(59')-H(59F) | 109.5     | O(39)-C(65)-N(3)        | 120(2)     |
| H(59D)-C(59')-H(59F) | 109.5     | O(39)-C(65)-H(65)       | 119.9      |
| H(59E)-C(59')-H(59F) | 109.5     | N(3)-C(65)-H(65)        | 119.9      |
| C(60)-O(38)-Sm(3)    | 127.7(5)  | N(3)-C(66)-C(67)        | 112.2(19)  |
| C(60)-N(2)-C(63)     | 120.3(9)  | N(3)-C(66)-H(66A)       | 109.2      |
| C(60)-N(2)-C(61)     | 119.0(10) | C(67)-C(66)-H(66A)      | 109.2      |
| C(63)-N(2)-C(61)     | 119.8(10) | N(3)-C(66)-H(66B)       | 109.2      |
| O(38)-C(60)-N(2)     | 124.1(9)  | C(67)-C(66)-H(66B)      | 109.2      |
| O(38)-C(60)-H(60)    | 118.0     | H(66A)-C(66)-H(66B)     | 107.9      |
| N(2)-C(60)-H(60)     | 118.0     | C(66)-C(67)-H(67A)      | 109.5      |
| C(62)-C(61)-N(2)     | 112.7(14) | C(66)-C(67)-H(67B)      | 109.5      |
| C(62)-C(61)-H(61A)   | 109.1     | H(67A)-C(67)-H(67B)     | 109.5      |
| N(2)-C(61)-H(61A)    | 109.1     | C(66)-C(67)-H(67C)      | 109.5      |
| C(62)-C(61)-H(61B)   | 109.1     | H(67A)-C(67)-H(67C)     | 109.5      |
| N(2)-C(61)-H(61B)    | 109.1     | H(67B)-C(67)-H(67C)     | 109.5      |
| H(61A)-C(61)-H(61B)  | 107.8     | N(3)-C(68)-C(69)        | 112.3(18)  |
| C(61)-C(62)-H(62A)   | 109.5     | N(3)-C(68)-H(68A)       | 109.1      |



|                      |           |                      |           |
|----------------------|-----------|----------------------|-----------|
| C(61)-C(62)-H(62B)   | 109.5     | C(69)-C(68)-H(68A)   | 109.1     |
| H(62A)-C(62)-H(62B)  | 109.5     | N(3)-C(68)-H(68B)    | 109.1     |
| C(61)-C(62)-H(624)   | 109.5     | C(69)-C(68)-H(68B)   | 109.1     |
| H(62A)-C(62)-H(624)  | 109.5     | H(68A)-C(68)-H(68B)  | 107.9     |
| H(62B)-C(62)-H(624)  | 109.5     | C(68)-C(69)-H(69A)   | 109.5     |
| N(2)-C(63)-C(64)     | 111.0(13) | C(68)-C(69)-H(69B)   | 109.5     |
| N(2)-C(63)-H(63A)    | 109.4     | H(69A)-C(69)-H(69B)  | 109.5     |
| C(64)-C(63)-H(63A)   | 109.4     | C(68)-C(69)-H(69C)   | 109.5     |
| N(2)-C(63)-H(63B)    | 109.4     | H(69A)-C(69)-H(69C)  | 109.5     |
| C(64)-C(63)-H(63B)   | 109.4     | H(69B)-C(69)-H(69C)  | 109.5     |
| H(63A)-C(63)-H(63B)  | 108.0     | C(65')-N(3')-C(68')  | 121.2(14) |
| C(63)-C(64)-H(64A)   | 109.5     | C(65')-N(3')-C(66')  | 119.2(13) |
| C(63)-C(64)-H(64B)   | 109.5     | C(68')-N(3')-C(66')  | 118.9(14) |
| H(64A)-C(64)-H(64B)  | 109.5     | O(39)-C(65')-N(3')   | 118.6(16) |
| C(63)-C(64)-H(64C)   | 109.5     | O(39)-C(65')-H(65')  | 120.7     |
| H(64A)-C(64)-H(64C)  | 109.5     | N(3')-C(65')-H(65')  | 120.7     |
| H(64B)-C(64)-H(64C)  | 109.5     | N(3')-C(66')-C(67')  | 110.9(15) |
| C(65)-N(3)-C(66)     | 119.9(16) | N(3')-C(66')-H(66C)  | 109.5     |
| C(65)-N(3)-C(68)     | 120.1(15) | C(67')-C(66')-H(66C) | 109.5     |
| C(66)-N(3)-C(68)     | 118.8(17) | N(3')-C(66')-H(66D)  | 109.5     |
| H(78A)-C(78)-H(78B)  | 109.6     | C(67')-C(66')-H(66D) | 109.5     |
| C(78)-C(79)-H(79A)   | 109.5     | H(66C)-C(66')-H(66D) | 108.0     |
| C(78)-C(79)-H(79B)   | 109.5     | C(66')-C(67')-H(67D) | 109.5     |
| H(79A)-C(79)-H(79B)  | 109.5     | C(66')-C(67')-H(67E) | 109.5     |
| C(78)-C(79)-H(79C)   | 109.4     | H(67D)-C(67')-H(67E) | 109.5     |
| H(79A)-C(79)-H(79C)  | 109.5     | C(66')-C(67')-H(67F) | 109.5     |
| H(79B)-C(79)-H(79C)  | 109.5     | H(67D)-C(67')-H(67F) | 109.5     |
| C(75')-N(5')-C(76')  | 124.6(18) | H(67E)-C(67')-H(67F) | 109.5     |
| C(75')-N(5')-C(78')  | 120.8(19) | N(3')-C(68')-C(69')  | 113.2(17) |
| C(76')-N(5')-C(78')  | 97.9(18)  | N(3')-C(68')-H(68C)  | 108.9     |
| O(41)-C(75')-N(5')   | 131.1(19) | C(69')-C(68')-H(68C) | 108.9     |
| O(41)-C(75')-H(75')  | 114.4     | N(3')-C(68')-H(68D)  | 108.9     |
| N(5')-C(75')-H(75')  | 114.4     | C(69')-C(68')-H(68D) | 108.9     |
| C(77')-C(76')-N(5')  | 115(2)    | H(68C)-C(68')-H(68D) | 107.7     |
| C(77')-C(76')-H(76C) | 108.5     | C(68')-C(69')-H(69D) | 109.5     |
| N(5')-C(76')-H(76C)  | 108.5     | C(68')-C(69')-H(69E) | 109.5     |

|                      |           |                      |           |
|----------------------|-----------|----------------------|-----------|
| C(77')-C(76')-H(76D) | 108.5     | H(69D)-C(69')-H(69E) | 109.5     |
| N(5')-C(76')-H(76D)  | 108.5     | C(68')-C(69')-H(69F) | 109.5     |
| H(76C)-C(76')-H(76D) | 107.5     | H(69D)-C(69')-H(69F) | 109.5     |
| C(76')-C(77')-H(77D) | 109.5     | H(69E)-C(69')-H(69F) | 109.5     |
| C(76')-C(77')-H(77E) | 109.5     | C(70)-O(40)-Sm(6)    | 126.0(5)  |
| H(77D)-C(77')-H(77E) | 109.5     | C(70)-N(4)-C(71)     | 124.3(9)  |
| C(76')-C(77')-H(77F) | 109.5     | C(70)-N(4)-C(73)     | 119.8(8)  |
| H(77D)-C(77')-H(77F) | 109.5     | C(71)-N(4)-C(73)     | 115.8(9)  |
| H(77E)-C(77')-H(77F) | 109.5     | O(40)-C(70)-N(4)     | 123.8(8)  |
| N(5')-C(78')-C(79')  | 100(2)    | O(40)-C(70)-H(70)    | 118.1     |
| N(5')-C(78')-H(78C)  | 111.8     | N(4)-C(70)-H(70)     | 118.1     |
| C(79')-C(78')-H(78C) | 111.8     | C(72)-C(71)-N(4)     | 116.0(11) |
| N(5')-C(78')-H(78D)  | 111.8     | C(72)-C(71)-H(71A)   | 108.3     |
| C(79')-C(78')-H(78D) | 111.8     | N(4)-C(71)-H(71A)    | 108.3     |
| H(78C)-C(78')-H(78D) | 109.5     | C(72)-C(71)-H(71B)   | 108.3     |
| C(78')-C(79')-H(79D) | 109.5     | N(4)-C(71)-H(71B)    | 108.3     |
| C(78')-C(79')-H(79E) | 109.5     | H(71A)-C(71)-H(71B)  | 107.4     |
| H(79D)-C(79')-H(79E) | 109.5     | C(71)-C(72)-H(72A)   | 109.5     |
| C(78')-C(79')-H(79F) | 109.5     | C(71)-C(72)-H(72B)   | 109.5     |
| H(79D)-C(79')-H(79F) | 109.5     | H(72A)-C(72)-H(72B)  | 109.5     |
| H(79E)-C(79')-H(79F) | 109.5     | C(71)-C(72)-H(72C)   | 109.5     |
| C(55')-O(37)-Sm(1)   | 132.9(13) | H(72A)-C(72)-H(72C)  | 109.5     |
| C(55)-O(37)-Sm(1)    | 125.2(12) | H(72B)-C(72)-H(72C)  | 109.5     |
| C(65)-O(39)-Sm(4)    | 128.1(11) | N(4)-C(73)-C(74)     | 109.6(11) |
| C(65')-O(39)-Sm(4)   | 125.4(10) | N(4)-C(73)-H(73A)    | 109.7     |
| C(75)-O(41)-Sm(5)    | 149(2)    | C(74)-C(73)-H(73A)   | 109.7     |
| C(75')-O(41)-Sm(5)   | 134.1(12) | N(4)-C(73)-H(73B)    | 109.7     |
| O(41)-C(75)-N(5)     | 115(3)    | C(74)-C(73)-H(73B)   | 109.7     |
| O(41)-C(75)-H(75)    | 122.4     | H(73A)-C(73)-H(73B)  | 108.2     |
| N(5)-C(75)-H(75)     | 122.4     | C(73)-C(74)-H(74A)   | 109.5     |
| N(5)-C(76)-C(77)     | 115(3)    | C(73)-C(74)-H(74B)   | 109.5     |
| N(5)-C(76)-H(76A)    | 108.6     | H(74A)-C(74)-H(74B)  | 109.5     |
| C(77)-C(76)-H(76A)   | 108.6     | C(73)-C(74)-H(74C)   | 109.5     |
| N(5)-C(76)-H(76B)    | 108.6     | H(74A)-C(74)-H(74C)  | 109.5     |
| C(77)-C(76)-H(76B)   | 108.6     | H(74B)-C(74)-H(74C)  | 109.5     |
| H(76A)-C(76)-H(76B)  | 107.6     | C(75)-N(5)-C(76)     | 119(3)    |

|                     |       |                    |        |
|---------------------|-------|--------------------|--------|
| C(76)-C(77)-H(77A)  | 109.5 | C(75)-N(5)-C(78)   | 115(3) |
| C(76)-C(77)-H(77B)  | 109.5 | C(76)-N(5)-C(78)   | 98(2)  |
| H(77A)-C(77)-H(77B) | 109.5 | N(5)-C(78)-H(78A)  | 111.9  |
| C(76)-C(77)-H(77C)  | 109.5 | C(79)-C(78)-H(78A) | 111.9  |
| H(77A)-C(77)-H(77C) | 109.5 | N(5)-C(78)-H(78B)  | 112.0  |
| H(77B)-C(77)-H(77C) | 109.5 | C(79)-C(78)-H(78B) | 112.0  |
| N(5)-C(78)-C(79)    | 99(2) |                    |        |

Symmetry transformations used to generate equivalent atoms:

#1  $x,y,z+1$  #2  $x,y+1,z$  #3  $x,y-1,z-1$  #4  $-x+1,-y+1,z-1/2$  #5  $-x+1,-y+2,z-1/2$  #6  $-x+1,-y+2,z+1/2$  #7  $x,y+1,z+1$  #8  $-x+3/2,y-1/2,z+1/2$  #9  $-x+3/2,y-1/2,z-1/2$  #10  $-x+1,-y+1,z+1/2$  #11  $-x+3/2,y+1/2,z-1/2$  #12  $-x+3/2,y+1/2,z+1/2$  #13  $x,y-1,z$  #14  $x,y,z-1$

---

5

|              |           |               |           |
|--------------|-----------|---------------|-----------|
| C(1)-O(2)    | 1.247(17) | C(47)-O(28)   | 1.23(3)   |
| C(1)-O(1)    | 1.255(16) | C(47)-N(3)    | 1.33(2)   |
| C(1)-C(2)    | 1.473(18) | C(47)-H(47)   | 0.9300    |
| C(2)-C(3)    | 1.363(18) | C(47')-O(28)  | 1.110(19) |
| C(2)-S(1)    | 1.718(12) | C(47')-N(3)   | 1.40(2)   |
| C(3)-C(4)    | 1.421(18) | C(47')-H(47') | 0.9300    |
| C(3)-H(3)    | 0.9300    | C(48)-N(3)    | 1.45(2)   |
| C(4)-C(5)    | 1.349(19) | C(48)-C(49)   | 1.53(3)   |
| C(4)-H(4)    | 0.9300    | C(48)-H(48A)  | 0.9700    |
| C(5)-C(6)    | 1.490(17) | C(48)-H(48B)  | 0.9700    |
| C(5)-S(1)    | 1.705(12) | C(49)-H(49A)  | 0.9600    |
| C(6)-O(4)    | 1.224(17) | C(49)-H(49B)  | 0.9600    |
| C(6)-O(3)    | 1.278(16) | C(49)-H(49C)  | 0.9600    |
| C(7)-O(6)    | 1.244(15) | C(50)-N(3)    | 1.48(2)   |
| C(7)-O(5)    | 1.278(16) | C(50)-C(51)   | 1.50(3)   |
| C(7)-C(8)    | 1.465(17) | C(50)-H(50A)  | 0.9700    |
| C(7)-Eu(1)#1 | 3.150(13) | C(50)-H(50B)  | 0.9700    |
| C(8)-C(9)    | 1.343(18) | C(51)-H(51A)  | 0.9600    |
| C(8)-S(2)    | 1.717(11) | C(51)-H(51B)  | 0.9600    |

|               |           |               |          |
|---------------|-----------|---------------|----------|
| C(9)-C(10)    | 1.417(18) | C(51)-H(51C)  | 0.9600   |
| C(9)-H(9)     | 0.9300    | O(1)-Eu(2)#3  | 2.327(8) |
| C(10)-C(11)   | 1.357(17) | O(2)-Eu(1)#3  | 2.454(8) |
| C(10)-H(10)   | 0.9300    | O(3)-Eu(4)#4  | 2.286(8) |
| C(11)-C(12)   | 1.481(16) | O(4)-Eu(1)    | 2.424(9) |
| C(11)-S(2)    | 1.699(12) | O(5)-Eu(2)#1  | 2.277(8) |
| C(12)-O(8)    | 1.250(15) | O(6)-Eu(1)#1  | 2.376(8) |
| C(12)-O(7)    | 1.275(15) | O(7)-Eu(1)    | 2.318(8) |
| C(13)-O(9)    | 1.232(15) | O(8)-Eu(2)    | 2.382(8) |
| C(13)-O(10)   | 1.235(15) | O(9)-Eu(1)#3  | 2.332(9) |
| C(13)-C(14)   | 1.496(17) | O(10)-Eu(4)#5 | 2.378(8) |
| C(14)-C(15)   | 1.342(18) | O(11)-Eu(1)   | 2.458(8) |
| C(14)-S(3)    | 1.717(13) | O(11)-Eu(2)   | 2.782(9) |
| C(15)-C(16)   | 1.414(18) | O(12)-Eu(2)   | 2.422(9) |
| C(15)-H(15)   | 0.9300    | O(13)-Eu(4)#2 | 2.459(8) |
| C(16)-C(17)   | 1.355(19) | O(14)-Eu(3)#2 | 2.353(7) |
| C(16)-H(16)   | 0.9300    | O(14)-Eu(4)#2 | 2.833(8) |
| C(17)-C(18)   | 1.489(17) | O(15)-Eu(2)   | 2.414(8) |
| C(17)-S(3)    | 1.710(13) | O(16)-Eu(3)   | 2.298(8) |
| C(18)-O(12)   | 1.249(16) | O(17)-Eu(3)#6 | 2.392(7) |
| C(18)-O(11)   | 1.255(15) | O(18)-Eu(4)#6 | 2.376(7) |
| C(18)-Eu(2)   | 2.951(13) | O(19)-Eu(4)   | 2.311(8) |
| C(19)-O(13)   | 1.253(14) | O(19)-Eu(3)   | 2.890(8) |
| C(19)-O(14)   | 1.264(14) | O(20)-Eu(3)   | 2.485(8) |
| C(19)-C(20)   | 1.478(16) | O(21)-Eu(3)#2 | 2.390(8) |
| C(19)-Eu(4)#2 | 2.999(12) | O(22)-Eu(2)#2 | 2.302(8) |
| C(20)-C(21)   | 1.371(17) | O(23)-Eu(3)   | 2.449(8) |
| C(20)-S(4)    | 1.726(12) | O(24)-Eu(4)   | 2.367(7) |
| C(21)-C(22)   | 1.382(17) | O(25)-Eu(3)   | 2.657(5) |
| C(21)-H(21)   | 0.9300    | O(25)-Eu(2)   | 2.677(6) |
| C(22)-C(23)   | 1.357(18) | O(26)-Eu(3)   | 2.444(8) |
| C(22)-H(22)   | 0.9300    | O(27)-Eu(1)   | 2.420(8) |
| C(23)-C(24)   | 1.509(17) | O(28)-Eu(4)   | 2.402(8) |
| C(23)-S(4)    | 1.728(13) | O(29)-Eu(1)   | 2.560(7) |
| C(24)-O(16)   | 1.218(16) | O(29)-H(29A)  | 0.85(3)  |
| C(24)-O(15)   | 1.257(16) | O(29)-H(29B)  | 0.85(3)  |

|              |           |               |           |
|--------------|-----------|---------------|-----------|
| C(25)-O(18)  | 1.254(14) | Eu(1)-O(9)#7  | 2.332(9)  |
| C(25)-O(17)  | 1.258(14) | Eu(1)-O(6)#8  | 2.376(8)  |
| C(25)-C(26)  | 1.484(15) | Eu(1)-O(2)#7  | 2.454(8)  |
| C(26)-C(27)  | 1.348(17) | Eu(1)-C(7)#8  | 3.150(13) |
| C(26)-S(5)   | 1.713(11) | Eu(1)-Eu(2)   | 4.2233(6) |
| C(27)-C(28)  | 1.421(17) | Eu(2)-O(5)#8  | 2.277(8)  |
| C(27)-H(27)  | 0.9300    | Eu(2)-O(22)#9 | 2.302(8)  |
| C(28)-C(29)  | 1.353(17) | Eu(2)-O(1)#7  | 2.327(8)  |
| C(28)-H(28)  | 0.9300    | Eu(3)-O(14)#9 | 2.353(7)  |
| C(29)-C(30)  | 1.492(16) | Eu(3)-O(21)#9 | 2.390(8)  |
| C(29)-S(5)   | 1.711(11) | Eu(3)-O(17)#5 | 2.392(7)  |
| C(30)-O(20)  | 1.245(15) | Eu(3)-Eu(4)   | 4.0915(6) |
| C(30)-O(19)  | 1.257(14) | Eu(4)-O(3)#10 | 2.286(8)  |
| C(30)-Eu(3)  | 3.036(12) | Eu(4)-O(18)#5 | 2.376(7)  |
| C(31)-O(22)  | 1.249(16) | Eu(4)-O(10)#6 | 2.378(8)  |
| C(31)-O(21)  | 1.273(17) | Eu(4)-O(13)#9 | 2.459(8)  |
| C(31)-C(32)  | 1.469(18) | Eu(4)-O(14)#9 | 2.833(8)  |
| C(32)-C(33)  | 1.378(17) | Eu(4)-C(19)#9 | 2.999(12) |
| C(32)-S(6)   | 1.697(13) | C(38)-H(38B)  | 0.9700    |
| C(33)-C(34)  | 1.396(17) | C(39)-H(39A)  | 0.9600    |
| C(33)-H(33)  | 0.9300    | C(39)-H(39B)  | 0.9600    |
| C(34)-C(35)  | 1.375(17) | C(39)-H(39C)  | 0.9600    |
| C(34)-H(34)  | 0.9300    | C(40)-N(1)    | 1.48(2)   |
| C(35)-C(36)  | 1.485(16) | C(40)-C(41)   | 1.48(2)   |
| C(35)-S(6)   | 1.705(12) | C(40)-H(40A)  | 0.9700    |
| C(36)-O(23)  | 1.246(14) | C(40)-H(40B)  | 0.9700    |
| C(36)-O(24)  | 1.286(14) | C(41)-H(41A)  | 0.9600    |
| C(37)-O(26)  | 1.204(13) | C(41)-H(41B)  | 0.9600    |
| C(37)-N(1)   | 1.332(15) | C(41)-H(41C)  | 0.9600    |
| C(37)-H(37)  | 0.9300    | C(42)-O(27)   | 1.189(17) |
| C(38)-N(1)   | 1.463(19) | C(42)-N(2)    | 1.35(2)   |
| C(38)-C(39)  | 1.50(2)   | C(42)-H(42)   | 0.9300    |
| C(38)-H(38A) | 0.9700    | C(43)-N(2)    | 1.47(2)   |
| C(45)-N(2)   | 1.45(2)   | C(43)-C(44)   | 1.50(3)   |
| C(45)-C(46)  | 1.54(2)   | C(43)-H(43A)  | 0.9700    |
| C(45)-H(45A) | 0.9700    | C(43)-H(43B)  | 0.9700    |

|                   |           |                     |           |
|-------------------|-----------|---------------------|-----------|
| C(45)-H(45B)      | 0.9700    | C(44)-H(44A)        | 0.9600    |
| C(46)-H(46A)      | 0.9600    | C(44)-H(44B)        | 0.9600    |
| C(46)-H(46B)      | 0.9600    | C(44)-H(44C)        | 0.9600    |
| C(46)-H(46C)      | 0.9600    | O(8)-C(12)-C(11)    | 119.6(11) |
| (2)-C(1)-O(1)     | 127.4(12) | O(7)-C(12)-C(11)    | 114.9(11) |
| O(2)-C(1)-C(2)    | 118.1(11) | O(9)-C(13)-O(10)    | 126.1(12) |
| O(1)-C(1)-C(2)    | 114.5(13) | O(9)-C(13)-C(14)    | 116.1(12) |
| C(3)-C(2)-C(1)    | 128.0(12) | O(10)-C(13)-C(14)   | 117.8(11) |
| C(3)-C(2)-S(1)    | 111.0(10) | C(15)-C(14)-C(13)   | 126.7(12) |
| C(1)-C(2)-S(1)    | 120.8(10) | C(15)-C(14)-S(3)    | 111.7(10) |
| C(2)-C(3)-C(4)    | 112.0(13) | C(13)-C(14)-S(3)    | 121.6(10) |
| C(2)-C(3)-H(3)    | 124.0     | C(14)-C(15)-C(16)   | 113.0(13) |
| C(4)-C(3)-H(3)    | 124.0     | C(14)-C(15)-H(15)   | 123.5     |
| C(5)-C(4)-C(3)    | 113.3(13) | C(16)-C(15)-H(15)   | 123.5     |
| C(5)-C(4)-H(4)    | 123.3     | C(17)-C(16)-C(15)   | 112.2(13) |
| C(3)-C(4)-H(4)    | 123.3     | C(17)-C(16)-H(16)   | 123.9     |
| C(4)-C(5)-C(6)    | 128.4(12) | C(15)-C(16)-H(16)   | 123.9     |
| C(4)-C(5)-S(1)    | 111.3(10) | C(16)-C(17)-C(18)   | 128.7(12) |
| C(6)-C(5)-S(1)    | 120.1(10) | C(16)-C(17)-S(3)    | 111.8(10) |
| O(4)-C(6)-O(3)    | 125.7(12) | C(18)-C(17)-S(3)    | 119.4(10) |
| O(4)-C(6)-C(5)    | 120.5(12) | O(12)-C(18)-O(11)   | 123.1(12) |
| O(3)-C(6)-C(5)    | 113.7(12) | O(12)-C(18)-C(17)   | 117.9(11) |
| O(6)-C(7)-O(5)    | 125.3(12) | O(11)-C(18)-C(17)   | 119.0(12) |
| O(6)-C(7)-C(8)    | 118.3(12) | O(12)-C(18)-Eu(2)   | 53.4(6)   |
| O(5)-C(7)-C(8)    | 116.4(11) | O(11)-C(18)-Eu(2)   | 69.9(7)   |
| O(6)-C(7)-Eu(1)#1 | 42.0(6)   | C(17)-C(18)-Eu(2)   | 169.4(10) |
| O(5)-C(7)-Eu(1)#1 | 84.7(7)   | O(13)-C(19)-O(14)   | 122.6(11) |
| C(8)-C(7)-Eu(1)#1 | 156.9(9)  | O(13)-C(19)-C(20)   | 118.9(11) |
| C(9)-C(8)-C(7)    | 128.1(11) | O(14)-C(19)-C(20)   | 118.5(11) |
| C(9)-C(8)-S(2)    | 111.1(9)  | O(13)-C(19)-Eu(4)#2 | 53.1(6)   |
| C(7)-C(8)-S(2)    | 120.8(9)  | O(14)-C(19)-Eu(4)#2 | 70.2(6)   |
| C(8)-C(9)-C(10)   | 113.4(12) | C(20)-C(19)-Eu(4)#2 | 167.9(8)  |
| C(8)-C(9)-H(9)    | 123.3     | C(21)-C(20)-C(19)   | 127.5(11) |
| C(10)-C(9)-H(9)   | 123.3     | C(21)-C(20)-S(4)    | 111.5(9)  |
| C(11)-C(10)-C(9)  | 111.6(12) | C(19)-C(20)-S(4)    | 121.0(9)  |
| C(11)-C(10)-H(10) | 124.2     | C(20)-C(21)-C(22)   | 112.1(11) |

|                     |           |                   |           |
|---------------------|-----------|-------------------|-----------|
| C(9)-C(10)-H(10)    | 124.2     | C(20)-C(21)-H(21) | 123.9     |
| C(10)-C(11)-C(12)   | 126.2(11) | C(22)-C(21)-H(21) | 123.9     |
| C(10)-C(11)-S(2)    | 112.1(9)  | C(23)-C(22)-C(21) | 114.7(12) |
| C(12)-C(11)-S(2)    | 121.7(9)  | C(23)-C(22)-H(22) | 122.7     |
| O(8)-C(12)-O(7)     | 125.5(11) | C(21)-C(22)-H(22) | 122.7     |
| C(38)-C(39)-H(39C)  | 109.5     | C(22)-C(23)-C(24) | 124.8(12) |
| H(39A)-C(39)-H(39C) | 109.5     | C(22)-C(23)-S(4)  | 110.6(10) |
| H(39B)-C(39)-H(39C) | 109.5     | C(24)-C(23)-S(4)  | 124.6(11) |
| N(1)-C(40)-C(41)    | 115(2)    | O(16)-C(24)-O(15) | 126.4(12) |
| N(1)-C(40)-H(40A)   | 108.5     | O(16)-C(24)-C(23) | 114.2(12) |
| C(41)-C(40)-H(40A)  | 108.5     | O(15)-C(24)-C(23) | 119.4(12) |
| N(1)-C(40)-H(40B)   | 108.5     | O(18)-C(25)-O(17) | 125.8(10) |
| C(41)-C(40)-H(40B)  | 108.5     | O(18)-C(25)-C(26) | 117.7(10) |
| H(40A)-C(40)-H(40B) | 107.5     | O(17)-C(25)-C(26) | 116.6(11) |
| C(40)-C(41)-H(41A)  | 109.5     | C(27)-C(26)-C(25) | 127.9(11) |
| C(40)-C(41)-H(41B)  | 109.5     | C(27)-C(26)-S(5)  | 111.7(9)  |
| H(41A)-C(41)-H(41B) | 109.5     | C(25)-C(26)-S(5)  | 120.5(9)  |
| C(40)-C(41)-H(41C)  | 109.5     | C(26)-C(27)-C(28) | 113.3(11) |
| H(41A)-C(41)-H(41C) | 109.5     | C(26)-C(27)-H(27) | 123.3     |
| H(41B)-C(41)-H(41C) | 109.5     | C(28)-C(27)-H(27) | 123.3     |
| O(27)-C(42)-N(2)    | 126(2)    | C(29)-C(28)-C(27) | 111.1(11) |
| O(27)-C(42)-H(42)   | 116.9     | C(29)-C(28)-H(28) | 124.5     |
| N(2)-C(42)-H(42)    | 116.9     | C(27)-C(28)-H(28) | 124.5     |
| N(2)-C(43)-C(44)    | 142(4)    | C(28)-C(29)-C(30) | 126.8(11) |
| N(2)-C(43)-H(43A)   | 101.4     | C(28)-C(29)-S(5)  | 112.8(9)  |
| C(44)-C(43)-H(43A)  | 101.4     | C(30)-C(29)-S(5)  | 120.3(9)  |
| N(2)-C(43)-H(43B)   | 101.4     | O(20)-C(30)-O(19) | 123.1(11) |
| C(44)-C(43)-H(43B)  | 101.4     | O(20)-C(30)-C(29) | 118.5(10) |
| H(43A)-C(43)-H(43B) | 104.6     | O(19)-C(30)-C(29) | 118.4(11) |
| C(43)-C(44)-H(44A)  | 109.5     | O(20)-C(30)-Eu(3) | 52.6(6)   |
| C(43)-C(44)-H(44B)  | 109.5     | O(19)-C(30)-Eu(3) | 71.3(6)   |
| H(44A)-C(44)-H(44B) | 109.5     | C(29)-C(30)-Eu(3) | 167.0(8)  |
| C(43)-C(44)-H(44C)  | 109.5     | O(22)-C(31)-O(21) | 124.3(12) |
| H(44A)-C(44)-H(44C) | 109.5     | O(22)-C(31)-C(32) | 117.7(13) |
| H(44B)-C(44)-H(44C) | 109.5     | O(21)-C(31)-C(32) | 118.0(12) |
| N(2)-C(45)-C(46)    | 101(3)    | C(33)-C(32)-C(31) | 125.7(12) |

|                     |        |                     |           |
|---------------------|--------|---------------------|-----------|
| N(2)-C(45)-H(45A)   | 111.7  | C(33)-C(32)-S(6)    | 111.7(9)  |
| C(46)-C(45)-H(45A)  | 111.7  | C(31)-C(32)-S(6)    | 122.4(11) |
| N(2)-C(45)-H(45B)   | 111.7  | C(32)-C(33)-C(34)   | 112.7(11) |
| C(46)-C(45)-H(45B)  | 111.7  | C(32)-C(33)-H(33)   | 123.6     |
| H(45A)-C(45)-H(45B) | 109.4  | C(34)-C(33)-H(33)   | 123.6     |
| C(45)-C(46)-H(46A)  | 109.5  | C(35)-C(34)-C(33)   | 111.8(11) |
| C(45)-C(46)-H(46B)  | 109.5  | C(35)-C(34)-H(34)   | 124.1     |
| H(46A)-C(46)-H(46B) | 109.5  | C(33)-C(34)-H(34)   | 124.1     |
| C(45)-C(46)-H(46C)  | 109.5  | C(34)-C(35)-C(36)   | 128.2(11) |
| H(46A)-C(46)-H(46C) | 109.5  | C(34)-C(35)-S(6)    | 112.1(9)  |
| H(46B)-C(46)-H(46C) | 109.5  | C(36)-C(35)-S(6)    | 119.6(9)  |
| O(28)-C(47)-N(3)    | 123(3) | O(23)-C(36)-O(24)   | 125.8(10) |
| O(28)-C(47)-H(47)   | 118.3  | O(23)-C(36)-C(35)   | 118.4(10) |
| N(3)-C(47)-H(47)    | 118.3  | O(24)-C(36)-C(35)   | 115.7(11) |
| O(28)-C(47')-N(3)   | 127(3) | O(26)-C(37)-N(1)    | 124.6(14) |
| O(28)-C(47')-H(47') | 116.3  | O(26)-C(37)-H(37)   | 117.7     |
| N(3)-C(47')-H(47')  | 116.3  | N(1)-C(37)-H(37)    | 117.7     |
| N(3)-C(48)-C(49)    | 113(3) | N(1)-C(38)-C(39)    | 113(2)    |
| N(3)-C(48)-H(48A)   | 108.9  | N(1)-C(38)-H(38A)   | 109.0     |
| C(49)-C(48)-H(48A)  | 108.9  | C(39)-C(38)-H(38A)  | 109.0     |
| N(3)-C(48)-H(48B)   | 108.9  | N(1)-C(38)-H(38B)   | 109.0     |
| C(49)-C(48)-H(48B)  | 108.9  | C(39)-C(38)-H(38B)  | 109.0     |
| H(48A)-C(48)-H(48B) | 107.7  | H(38A)-C(38)-H(38B) | 107.8     |
| C(48)-C(49)-H(49A)  | 109.5  | C(38)-C(39)-H(39A)  | 109.5     |
| C(48)-C(49)-H(49B)  | 109.5  | C(38)-C(39)-H(39B)  | 109.5     |
| H(49A)-C(49)-H(49B) | 109.5  | H(39A)-C(39)-H(39B) | 109.5     |
| C(48)-C(49)-H(49C)  | 109.5  | C(36)-O(23)-Eu(3)   | 138.6(7)  |
| H(49A)-C(49)-H(49C) | 109.5  | C(36)-O(24)-Eu(4)   | 132.3(7)  |
| H(49B)-C(49)-H(49C) | 109.5  | Eu(3)-O(25)-Eu(2)   | 124.0(2)  |
| N(3)-C(50)-C(51)    | 110(3) | C(37)-O(26)-Eu(3)   | 126.6(8)  |
| N(3)-C(50)-H(50A)   | 109.8  | C(42)-O(27)-Eu(1)   | 131.9(12) |
| C(51)-C(50)-H(50A)  | 109.8  | C(47')-O(28)-Eu(4)  | 147(2)    |
| N(3)-C(50)-H(50B)   | 109.8  | C(47)-O(28)-Eu(4)   | 130(3)    |
| C(51)-C(50)-H(50B)  | 109.8  | Eu(1)-O(29)-H(29A)  | 118(10)   |
| H(50A)-C(50)-H(50B) | 108.2  | Eu(1)-O(29)-H(29B)  | 118(10)   |
| C(50)-C(51)-H(51A)  | 109.5  | H(29A)-O(29)-H(29B) | 112(5)    |



|                       |           |                     |          |
|-----------------------|-----------|---------------------|----------|
| C(50)-C(51)-H(51B)    | 109.5     | C(5)-S(1)-C(2)      | 92.2(6)  |
| H(51A)-C(51)-H(51B)   | 109.5     | C(11)-S(2)-C(8)     | 91.7(5)  |
| C(50)-C(51)-H(51C)    | 109.5     | C(17)-S(3)-C(14)    | 91.2(6)  |
| H(51A)-C(51)-H(51C)   | 109.5     | C(20)-S(4)-C(23)    | 91.1(6)  |
| H(51B)-C(51)-H(51C)   | 109.5     | C(29)-S(5)-C(26)    | 91.0(5)  |
| C(37)-N(1)-C(38)      | 121.2(17) | C(32)-S(6)-C(35)    | 91.6(6)  |
| C(37)-N(1)-C(40)      | 120.9(15) | O(7)-Eu(1)-O(9)#7   | 137.9(4) |
| C(38)-N(1)-C(40)      | 117.7(15) | O(7)-Eu(1)-O(6)#8   | 81.4(3)  |
| C(42)-N(2)-C(45)      | 120(3)    | O(9)#7-Eu(1)-O(6)#8 | 75.5(3)  |
| C(42)-N(2)-C(43)      | 114(3)    | O(7)-Eu(1)-O(27)    | 137.3(4) |
| C(45)-N(2)-C(43)      | 126(3)    | O(9)#7-Eu(1)-O(27)  | 79.1(4)  |
| C(47)-N(3)-C(48)      | 125(3)    | O(6)#8-Eu(1)-O(27)  | 138.1(4) |
| C(47')-N(3)-C(48)     | 122(3)    | O(7)-Eu(1)-O(4)     | 81.8(3)  |
| C(47)-N(3)-C(50)      | 120(3)    | O(9)#7-Eu(1)-O(4)   | 97.3(4)  |
| C(47')-N(3)-C(50)     | 116(2)    | O(6)#8-Eu(1)-O(4)   | 144.7(3) |
| C(48)-N(3)-C(50)      | 115(2)    | O(27)-Eu(1)-O(4)    | 70.9(4)  |
| C(1)-O(1)-Eu(2)#3     | 133.8(9)  | O(7)-Eu(1)-O(2)#7   | 119.4(3) |
| C(1)-O(2)-Eu(1)#3     | 143.1(8)  | O(9)#7-Eu(1)-O(2)#7 | 87.0(3)  |
| C(6)-O(3)-Eu(4)#4     | 142.4(8)  | O(6)#8-Eu(1)-O(2)#7 | 73.3(3)  |
| C(6)-O(4)-Eu(1)       | 126.7(9)  | O(27)-Eu(1)-O(2)#7  | 72.7(3)  |
| C(7)-O(5)-Eu(2)#1     | 164.3(9)  | O(4)-Eu(1)-O(2)#7   | 141.7(3) |
| C(7)-O(6)-Eu(1)#1     | 117.5(8)  | O(7)-Eu(1)-O(11)    | 68.7(3)  |
| C(12)-O(7)-Eu(1)      | 147.4(8)  | O(9)#7-Eu(1)-O(11)  | 153.3(4) |
| C(12)-O(8)-Eu(2)      | 129.0(7)  | O(6)#8-Eu(1)-O(11)  | 114.1(3) |
| C(13)-O(9)-Eu(1)#3    | 169.7(10) | O(27)-Eu(1)-O(11)   | 78.0(3)  |
| C(13)-O(10)-Eu(4)#5   | 133.0(8)  | O(4)-Eu(1)-O(11)    | 88.0(3)  |
| C(18)-O(11)-Eu(1)     | 166.8(9)  | O(2)#7-Eu(1)-O(11)  | 73.2(3)  |
| C(18)-O(11)-Eu(2)     | 85.0(8)   | O(7)-Eu(1)-O(29)    | 68.2(3)  |
| Eu(1)-O(11)-Eu(2)     | 107.3(3)  | O(9)#7-Eu(1)-O(29)  | 71.0(4)  |
| C(18)-O(12)-Eu(2)     | 102.2(8)  | O(6)#8-Eu(1)-O(29)  | 70.6(3)  |
| C(19)-O(13)-Eu(4)#2   | 102.9(7)  | O(27)-Eu(1)-O(29)   | 130.2(3) |
| C(19)-O(14)-Eu(3)#2   | 171.2(8)  | O(4)-Eu(1)-O(29)    | 74.4(4)  |
| C(19)-O(14)-Eu(4)#2   | 85.0(7)   | O(2)#7-Eu(1)-O(29)  | 141.3(4) |
| Eu(3)#2-O(14)-Eu(4)#2 | 103.8(3)  | O(11)-Eu(1)-O(29)   | 135.2(3) |
| C(24)-O(15)-Eu(2)     | 129.7(8)  | O(7)-Eu(1)-C(7)#8   | 73.4(3)  |
| C(24)-O(16)-Eu(3)     | 163.9(9)  | O(9)#7-Eu(1)-C(7)#8 | 93.5(4)  |

|                       |          |                      |            |
|-----------------------|----------|----------------------|------------|
| C(25)-O(17)-Eu(3)#6   | 135.8(7) | O(6)#8-Eu(1)-C(7)#8  | 20.5(3)    |
| C(25)-O(18)-Eu(4)#6   | 136.1(7) | O(27)-Eu(1)-C(7)#8   | 136.2(4)   |
| C(30)-O(19)-Eu(4)     | 169.8(8) | O(4)-Eu(1)-C(7)#8    | 152.6(4)   |
| C(30)-O(19)-Eu(3)     | 84.4(7)  | O(2)#7-Eu(1)-C(7)#8  | 63.8(3)    |
| Eu(4)-O(19)-Eu(3)     | 103.2(3) | O(11)-Eu(1)-C(7)#8   | 93.6(3)    |
| C(30)-O(20)-Eu(3)     | 103.9(7) | O(29)-Eu(1)-C(7)#8   | 85.6(3)    |
| C(31)-O(21)-Eu(3)#2   | 133.4(8) | O(7)-Eu(1)-Eu(2)     | 58.8(2)    |
| C(31)-O(22)-Eu(2)#2   | 143.2(9) | O(9)#7-Eu(1)-Eu(2)   | 142.1(2)   |
| O(24)-Eu(4)-O(10)#6   | 75.6(3)  | O(6)#8-Eu(1)-Eu(2)   | 75.2(2)    |
| O(18)#5-Eu(4)-O(10)#6 | 145.7(3) | O(27)-Eu(1)-Eu(2)    | 108.4(2)   |
| O(3)#10-Eu(4)-O(28)   | 79.2(4)  | O(4)-Eu(1)-Eu(2)     | 120.5(2)   |
| O(19)-Eu(4)-O(28)     | 84.7(4)  | O(2)#7-Eu(1)-Eu(2)   | 61.73(19)  |
| O(24)-Eu(4)-O(28)     | 144.2(5) | O(11)-Eu(1)-Eu(2)    | 39.0(2)    |
| O(18)#5-Eu(4)-O(28)   | 72.8(4)  | O(29)-Eu(1)-Eu(2)    | 119.86(16) |
| O(10)#6-Eu(4)-O(28)   | 73.5(4)  | C(7)#8-Eu(1)-Eu(2)   | 54.8(2)    |
| O(3)#10-Eu(4)-O(13)#9 | 70.7(3)  | O(5)#8-Eu(2)-O(22)#9 | 136.3(3)   |
| O(19)-Eu(4)-O(13)#9   | 125.8(3) | O(5)#8-Eu(2)-O(1)#7  | 78.8(3)    |
| O(24)-Eu(4)-O(13)#9   | 78.4(3)  | O(22)#9-Eu(2)-O(1)#7 | 138.6(3)   |
| O(18)#5-Eu(4)-O(13)#9 | 80.9(3)  | O(5)#8-Eu(2)-O(8)    | 80.2(3)    |
| O(10)#6-Eu(4)-O(13)#9 | 129.5(3) | O(22)#9-Eu(2)-O(8)   | 79.1(3)    |
| O(28)-Eu(4)-O(13)#9   | 136.2(4) | O(1)#7-Eu(2)-O(8)    | 137.9(3)   |
| O(3)#10-Eu(4)-O(14)#9 | 118.4(3) | O(5)#8-Eu(2)-O(15)   | 78.3(3)    |
| O(19)-Eu(4)-O(14)#9   | 77.4(2)  | O(22)#9-Eu(2)-O(15)  | 82.2(3)    |
| O(24)-Eu(4)-O(14)#9   | 68.6(3)  | O(1)#7-Eu(2)-O(15)   | 86.5(3)    |
| O(18)#5-Eu(4)-O(14)#9 | 66.0(2)  | O(8)-Eu(2)-O(15)     | 124.0(3)   |
| O(10)#6-Eu(4)-O(14)#9 | 143.6(3) | O(5)#8-Eu(2)-O(12)   | 133.8(3)   |
| O(28)-Eu(4)-O(14)#9   | 136.9(3) | O(22)#9-Eu(2)-O(12)  | 80.5(3)    |
| O(13)#9-Eu(4)-O(14)#9 | 48.7(2)  | O(1)#7-Eu(2)-O(12)   | 86.4(4)    |
| O(3)#10-Eu(4)-C(19)#9 | 93.8(3)  | O(8)-Eu(2)-O(12)     | 82.4(3)    |
| O(19)-Eu(4)-C(19)#9   | 102.2(3) | O(15)-Eu(2)-O(12)    | 144.6(3)   |
| O(24)-Eu(4)-C(19)#9   | 74.1(3)  | O(5)#8-Eu(2)-O(25)   | 139.9(3)   |
| O(18)#5-Eu(4)-C(19)#9 | 70.0(3)  | O(22)#9-Eu(2)-O(25)  | 73.0(3)    |
| O(10)#6-Eu(4)-C(19)#9 | 144.2(3) | O(1)#7-Eu(2)-O(25)   | 65.9(3)    |
| O(28)-Eu(4)-C(19)#9   | 140.7(4) | O(8)-Eu(2)-O(25)     | 139.3(3)   |
| O(13)#9-Eu(4)-C(19)#9 | 24.0(3)  | O(15)-Eu(2)-O(25)    | 80.9(3)    |
| O(14)#9-Eu(4)-C(19)#9 | 24.8(3)  | O(12)-Eu(2)-O(25)    | 64.6(3)    |

|                     |           |                       |            |
|---------------------|-----------|-----------------------|------------|
| O(3)#10-Eu(4)-Eu(3) | 151.9(2)  | O(5)#8-Eu(2)-O(11)    | 84.4(3)    |
| O(19)-Eu(4)-Eu(3)   | 43.4(2)   | O(22)#9-Eu(2)-O(11)   | 123.7(3)   |
| O(24)-Eu(4)-Eu(3)   | 67.91(19) | O(1)#7-Eu(2)-O(11)    | 70.6(3)    |
| O(18)#5-Eu(4)-Eu(3) | 67.83(19) | O(8)-Eu(2)-O(11)      | 71.3(3)    |
| O(10)#6-Eu(4)-Eu(3) | 124.3(2)  | O(15)-Eu(2)-O(11)     | 153.6(3)   |
| O(28)-Eu(4)-Eu(3)   | 117.1(2)  | O(12)-Eu(2)-O(11)     | 49.5(3)    |
| O(13)#9-Eu(4)-Eu(3) | 82.55(19) | O(25)-Eu(2)-O(11)     | 100.6(2)   |
| O(14)#9-Eu(4)-Eu(3) | 33.96(14) | O(5)#8-Eu(2)-C(18)    | 109.3(4)   |
| C(19)#9-Eu(4)-Eu(3) | 58.8(2)   | O(22)#9-Eu(2)-C(18)   | 101.5(3)   |
| O(16)-Eu(3)-O(20)   | 73.8(3)   | O(1)#7-Eu(2)-C(18)    | 78.7(4)    |
| O(14)#9-Eu(3)-O(20) | 123.2(3)  | O(8)-Eu(2)-C(18)      | 74.5(3)    |
| O(21)#9-Eu(3)-O(20) | 136.3(3)  | O(15)-Eu(2)-C(18)     | 161.4(4)   |
| O(17)#5-Eu(3)-O(20) | 85.8(3)   | O(12)-Eu(2)-C(18)     | 24.4(3)    |
| O(26)-Eu(3)-O(20)   | 137.1(3)  | O(25)-Eu(2)-C(18)     | 82.8(3)    |
| O(23)-Eu(3)-O(20)   | 76.3(3)   | O(11)-Eu(2)-C(18)     | 25.1(3)    |
| O(16)-Eu(3)-O(25)   | 68.7(3)   | O(5)#8-Eu(2)-Eu(1)    | 50.6(2)    |
| O(14)#9-Eu(3)-O(25) | 138.6(3)  | O(22)#9-Eu(2)-Eu(1)   | 146.7(2)   |
| O(21)#9-Eu(3)-O(25) | 70.9(3)   | O(1)#7-Eu(2)-Eu(1)    | 68.4(2)    |
| O(17)#5-Eu(3)-O(25) | 66.6(3)   | O(8)-Eu(2)-Eu(1)      | 70.0(2)    |
| O(26)-Eu(3)-O(25)   | 125.9(3)  | O(15)-Eu(2)-Eu(1)     | 125.5(2)   |
| O(23)-Eu(3)-O(25)   | 137.8(3)  | O(12)-Eu(2)-Eu(1)     | 83.2(2)    |
| O(20)-Eu(3)-O(25)   | 65.4(3)   | O(25)-Eu(2)-Eu(1)     | 124.59(12) |
| O(16)-Eu(3)-O(19)   | 117.3(3)  | O(11)-Eu(2)-Eu(1)     | 33.76(16)  |
| O(14)#9-Eu(3)-O(19) | 75.6(2)   | C(18)-Eu(2)-Eu(1)     | 58.8(3)    |
| O(21)#9-Eu(3)-O(19) | 144.7(3)  | O(16)-Eu(3)-O(14)#9   | 150.4(3)   |
| O(17)#5-Eu(3)-O(19) | 68.4(3)   | O(16)-Eu(3)-O(21)#9   | 91.1(3)    |
| O(26)-Eu(3)-O(19)   | 133.3(3)  | O(14)#9-Eu(3)-O(21)#9 | 89.9(3)    |
| O(23)-Eu(3)-O(19)   | 64.3(3)   | O(16)-Eu(3)-O(17)#5   | 135.3(3)   |
| O(20)-Eu(3)-O(19)   | 47.6(3)   | O(14)#9-Eu(3)-O(17)#5 | 73.5(3)    |
| O(25)-Eu(3)-O(19)   | 98.9(2)   | O(21)#9-Eu(3)-O(17)#5 | 76.7(3)    |
| O(16)-Eu(3)-C(30)   | 94.4(3)   | O(16)-Eu(3)-O(26)     | 74.3(3)    |
| O(14)#9-Eu(3)-C(30) | 99.7(3)   | O(14)#9-Eu(3)-O(26)   | 77.9(3)    |
| O(21)#9-Eu(3)-C(30) | 149.3(3)  | O(21)#9-Eu(3)-O(26)   | 71.8(3)    |
| O(17)#5-Eu(3)-C(30) | 78.2(3)   | O(17)#5-Eu(3)-O(26)   | 137.0(3)   |
| O(26)-Eu(3)-C(30)   | 138.6(3)  | O(16)-Eu(3)-O(23)     | 84.6(3)    |
| O(23)-Eu(3)-C(30)   | 66.5(3)   | O(14)#9-Eu(3)-O(23)   | 77.5(3)    |

|                       |          |                     |            |
|-----------------------|----------|---------------------|------------|
| O(20)-Eu(3)-C(30)     | 23.5(3)  | O(21)#9-Eu(3)-O(23) | 144.2(3)   |
| O(25)-Eu(3)-C(30)     | 83.0(3)  | O(17)#5-Eu(3)-O(23) | 129.0(3)   |
| O(19)-Eu(3)-C(30)     | 24.3(3)  | O(26)-Eu(3)-O(23)   | 72.8(3)    |
| O(16)-Eu(3)-Eu(4)     | 144.7(2) | O(14)#9-Eu(3)-Eu(4) | 42.25(19)  |
| O(19)-Eu(4)-O(24)     | 77.3(3)  | O(21)#9-Eu(3)-Eu(4) | 124.1(2)   |
| O(3)#10-Eu(4)-O(18)#5 | 98.6(3)  | O(17)#5-Eu(3)-Eu(4) | 64.8(2)    |
| O(19)-Eu(4)-O(18)#5   | 81.6(3)  | O(26)-Eu(3)-Eu(4)   | 111.3(2)   |
| O(24)-Eu(4)-O(18)#5   | 133.0(3) | O(23)-Eu(3)-Eu(4)   | 65.41(19)  |
| O(3)#10-Eu(4)-O(10)#6 | 81.1(3)  | O(20)-Eu(3)-Eu(4)   | 81.0(2)    |
| O(19)-Eu(4)-O(10)#6   | 89.1(3)  | O(25)-Eu(3)-Eu(4)   | 121.87(12) |
| O(3)#10-Eu(4)-O(19)   | 163.0(3) | O(19)-Eu(3)-Eu(4)   | 33.36(15)  |
| O(3)#10-Eu(4)-O(24)   | 113.3(3) | C(30)-Eu(3)-Eu(4)   | 57.6(2)    |

---

Symmetry transformations used to generate equivalent atoms:

#1 -x,y-1/2,-z+1 #2 -x,y+1/2,-z+2 #3 -x+1,y-1/2,-z+1 #4 x,y,z-1 #5 -x+1,y-1/2,-z+2 #6  
-x+1,y+1/2,-z+2 #7 -x+1,y+1/2,-z+1 #8 -x,y+1/2,-z+1 #9 -x,y-1/2,-z+2 #10 x,y,z+1

## 6

|                      |           |                      |          |
|----------------------|-----------|----------------------|----------|
| Gd1 Gd1 <sup>1</sup> | 3.9863(4) | C30 O32              | 1.253(6) |
| Gd1 O35 <sup>2</sup> | 2.417(3)  | C30 C26              | 1.482(6) |
| Gd1 O36              | 2.368(3)  | C30 O31              | 1.253(5) |
| Gd1 O13              | 2.384(3)  | C6 C7                | 1.375(6) |
| Gd1 O34 <sup>1</sup> | 2.679(3)  | C6 C5                | 1.407(6) |
| Gd1 O34              | 2.371(3)  | C16 C17              | 1.415(6) |
| Gd1 O21              | 2.306(3)  | O9 Gd2 <sup>5</sup>  | 2.283(3) |
| Gd1 O20 <sup>3</sup> | 2.324(3)  | O9 C8                | 1.266(5) |
| Gd1 O12 <sup>1</sup> | 2.366(3)  | O23 Gd2 <sup>4</sup> | 2.827(3) |
| Gd1 C33 <sup>2</sup> | 2.923(4)  | O23 C22 <sup>4</sup> | 1.267(5) |
| Gd2 Gd2 <sup>4</sup> | 4.0556(4) | C22 O23 <sup>4</sup> | 1.267(5) |
| Gd2 O10              | 2.308(3)  | C22 C18              | 1.476(6) |
| Gd2 O24              | 2.365(3)  | O34 Gd1 <sup>1</sup> | 2.679(3) |
| Gd2 O9 <sup>5</sup>  | 2.283(3)  | O34 C33 <sup>6</sup> | 1.274(5) |

|                                       |            |                          |            |
|---------------------------------------|------------|--------------------------|------------|
| Gd2 O23                               | 2.360(3)   | C18 C17                  | 1.373(6)   |
| Gd2 O23 <sup>4</sup>                  | 2.827(3)   | C26 C27                  | 1.362(6)   |
| Gd2 C22                               | 2.956(4)   | C28 C27                  | 1.416(6)   |
| Gd2 O32                               | 2.356(3)   | C11 C7                   | 1.491(6)   |
| Gd2 O43                               | 2.446(3)   | C11 O12                  | 1.258(5)   |
| Gd2 O31 <sup>4</sup>                  | 2.344(3)   | O43 C44                  | 1.241(8)   |
| S3 C7                                 | 1.726(4)   | O31 Gd2 <sup>4</sup>     | 2.344(3)   |
| S3 C4                                 | 1.725(4)   | N38 C37                  | 1.318(6)   |
| S14 C15                               | 1.717(4)   | N38 C39                  | 1.462(6)   |
| S14 C18                               | 1.724(4)   | N38 C41                  | 1.470(6)   |
| S25 C29                               | 1.725(4)   | C4 C5                    | 1.368(6)   |
| S25 C26                               | 1.725(4)   | C4 C8                    | 1.484(6)   |
| O10 C8                                | 1.253(5)   | C39 C40                  | 1.505(7)   |
| O35 Gd1 <sup>2</sup>                  | 2.417(3)   | C41 C42                  | 1.518(7)   |
| O35 C33                               | 1.259(5)   | N45 C44                  | 1.333(9)   |
| C19 C15                               | 1.487(6)   | N45 C46                  | 1.532(10)  |
| C19 O21                               | 1.280(5)   | N45 C48                  | 1.459(10)  |
| C19 O20                               | 1.234(5)   | O20 Gd1 <sup>3</sup>     | 2.324(3)   |
| O24 C22                               | 1.259(5)   | O12 Gd1 <sup>1</sup>     | 2.366(3)   |
| O36 C37                               | 1.230(6)   | C33 Gd1 <sup>2</sup>     | 2.923(4)   |
| O13 C11                               | 1.251(5)   | C33 O34 <sup>7</sup>     | 1.274(5)   |
| C29 C28                               | 1.353(6)   | C46 C47                  | 1.463(11)  |
| C29 C33                               | 1.472(6)   | C49 C48                  | 1.482(13)  |
| C15 C16                               | 1.374(6)   |                          |            |
| O35 <sup>1</sup> Gd1 Gd1 <sup>2</sup> | 85.91(7)   | O31 <sup>4</sup> Gd2 O23 | 74.17(11)  |
| O35 <sup>1</sup> Gd1 O34 <sup>2</sup> | 50.83(10)  | O31 <sup>4</sup> Gd2 C22 | 75.70(11)  |
| O35 <sup>1</sup> Gd1 C33 <sup>1</sup> | 25.04(11)  | O31 <sup>4</sup> Gd2 O32 | 134.20(11) |
| O36 Gd1 Gd1 <sup>2</sup>              | 137.74(8)  | O31 <sup>4</sup> Gd2 O43 | 72.47(12)  |
| O36 Gd1 O35 <sup>1</sup>              | 74.36(11)  | C4 S3 C7                 | 90.9(2)    |
| O36 Gd1 O13                           | 73.52(11)  | C15 S14 C18              | 91.1(2)    |
| O36 Gd1 O34                           | 137.67(11) | C26 S25 C29              | 90.9(2)    |
| O36 Gd1 O34 <sup>2</sup>              | 116.55(11) | C8 O10 Gd2               | 161.8(3)   |
| O36 Gd1 C33 <sup>1</sup>              | 95.90(12)  | C33 O35 Gd1 <sup>1</sup> | 100.6(3)   |
| O13 Gd1 Gd1 <sup>2</sup>              | 69.09(8)   | O21 C19 C15              | 116.0(4)   |
| O13 Gd1 O35 <sup>1</sup>              | 89.10(11)  | O20 C19 C15              | 119.0(4)   |
| O13 Gd1 O34 <sup>2</sup>              | 76.04(10)  | O20 C19 O21              | 125.0(4)   |
| O13 Gd1 C33 <sup>1</sup>              | 82.97(11)  | C22 O24 Gd2              | 105.1(3)   |

|                                       |            |                                       |            |
|---------------------------------------|------------|---------------------------------------|------------|
| O34 <sup>2</sup> Gd1 Gd1 <sup>2</sup> | 35.23(6)   | C37 O36 Gd1                           | 133.8(3)   |
| O34 Gd1 Gd1 <sup>2</sup>              | 40.69(7)   | C11 O13 Gd1                           | 135.4(3)   |
| O34 Gd1 O35 <sup>1</sup>              | 126.43(10) | C28 C29 S25                           | 112.6(3)   |
| O34 Gd1 O13                           | 70.89(11)  | C28 C29 C33                           | 127.8(4)   |
| O34 Gd1 O34 <sup>2</sup>              | 75.91(10)  | C33 C29 S25                           | 119.6(3)   |
| O34 <sup>2</sup> Gd1 C33 <sup>1</sup> | 25.83(10)  | C19 C15 S14                           | 119.6(3)   |
| O34 Gd1 C33 <sup>1</sup>              | 101.69(11) | C16 C15 S14                           | 112.3(3)   |
| O21 Gd1 Gd1 <sup>2</sup>              | 124.88(8)  | C16 C15 C19                           | 128.1(4)   |
| O21 Gd1 O35 <sup>1</sup>              | 148.75(11) | O32 C30 C26                           | 117.2(4)   |
| O21 Gd1 O36                           | 77.99(11)  | O32 C30 O31                           | 127.3(4)   |
| O21 Gd1 O13                           | 96.82(11)  | O31 C30 C26                           | 115.5(4)   |
| O21 Gd1 O34                           | 84.20(11)  | C7 C6 C5                              | 113.1(4)   |
| O21 Gd1 O34 <sup>2</sup>              | 160.09(10) | C15 C16 C17                           | 112.2(4)   |
| O21 Gd1 O20 <sup>3</sup>              | 79.91(10)  | C8 O9 Gd2 <sup>5</sup>                | 137.8(3)   |
| O21 Gd1 O12 <sup>2</sup>              | 103.51(11) | Gd2 O23 Gd2 <sup>4</sup>              | 102.49(10) |
| O21 Gd1 C33 <sup>1</sup>              | 173.63(12) | C22 <sup>4</sup> O23 Gd2 <sup>4</sup> | 83.1(3)    |
| O20 <sup>3</sup> Gd1 Gd1 <sup>2</sup> | 137.41(8)  | C22 <sup>4</sup> O23 Gd2              | 173.2(3)   |
| O20 <sup>3</sup> Gd1 O35 <sup>1</sup> | 79.42(11)  | O24 C22 Gd2                           | 50.6(2)    |
| O20 <sup>3</sup> Gd1 O36              | 75.67(11)  | O24 C22 O23 <sup>4</sup>              | 121.9(4)   |
| O20 <sup>3</sup> Gd1 O13              | 149.01(11) | O24 C22 C18                           | 117.5(4)   |
| O20 <sup>3</sup> Gd1 O34              | 138.28(11) | O23 <sup>4</sup> C22 Gd2              | 71.7(2)    |
| O20 <sup>3</sup> Gd1 O34 <sup>2</sup> | 115.78(10) | O23 <sup>4</sup> C22 C18              | 120.6(4)   |
| O20 <sup>3</sup> Gd1 O12 <sup>2</sup> | 73.32(11)  | C18 C22 Gd2                           | 166.0(3)   |
| O20 <sup>3</sup> Gd1 C33 <sup>1</sup> | 96.97(11)  | C30 O32 Gd2                           | 137.6(3)   |
| O12 <sup>2</sup> Gd1 Gd1 <sup>2</sup> | 67.65(8)   | Gd1 O34 Gd1 <sup>2</sup>              | 104.09(10) |
| O12 <sup>2</sup> Gd1 O35 <sup>1</sup> | 92.66(12)  | C33 <sup>6</sup> O34 Gd1 <sup>2</sup> | 87.8(2)    |
| O12 <sup>2</sup> Gd1 O36              | 148.09(11) | C33 <sup>6</sup> O34 Gd1              | 167.6(3)   |
| O12 <sup>2</sup> Gd1 O13              | 136.45(11) | C22 C18 S14                           | 117.3(3)   |
| O12 <sup>2</sup> Gd1 O34 <sup>2</sup> | 71.80(11)  | C17 C18 S14                           | 112.1(3)   |
| O12 <sup>2</sup> Gd1 O34              | 73.36(11)  | C17 C18 C22                           | 130.6(4)   |
| O12 <sup>2</sup> Gd1 C33 <sup>1</sup> | 80.72(12)  | C30 C26 S25                           | 121.2(4)   |
| C33 <sup>1</sup> Gd1 Gd1 <sup>2</sup> | 61.02(9)   | C27 C26 S25                           | 111.4(3)   |
| O10 Gd2 Gd2 <sup>4</sup>              | 136.51(8)  | C27 C26 C30                           | 127.2(4)   |
| O10 Gd2 O24                           | 77.70(11)  | C29 C28 C27                           | 111.9(4)   |
| O10 Gd2 O23                           | 140.72(12) | O13 C11 C7                            | 117.6(4)   |
| O10 Gd2 O23 <sup>4</sup>              | 113.25(10) | O13 C11 O12                           | 127.0(4)   |
| O10 Gd2 C22                           | 94.29(11)  | O12 C11 C7                            | 115.4(4)   |

|                                       |            |                                       |          |
|---------------------------------------|------------|---------------------------------------|----------|
| O10 Gd2 O32                           | 73.22(12)  | C44 O43 Gd2                           | 126.2(4) |
| O10 Gd2 O43                           | 75.82(12)  | C30 O31 Gd2 <sup>4</sup>              | 139.2(3) |
| O10 Gd2 O31 <sup>4</sup>              | 144.95(12) | C37 N38 C39                           | 119.1(4) |
| O24 Gd2 Gd2 <sup>4</sup>              | 83.77(8)   | C37 N38 C41                           | 121.5(4) |
| O24 Gd2 O23 <sup>4</sup>              | 49.38(10)  | C39 N38 C41                           | 119.4(4) |
| O24 Gd2 C22                           | 24.28(12)  | C6 C7 S3                              | 111.5(3) |
| O24 Gd2 O43                           | 76.47(12)  | C6 C7 C11                             | 127.2(4) |
| O9 <sup>5</sup> Gd2 Gd2 <sup>4</sup>  | 123.29(8)  | C11 C7 S3                             | 121.3(3) |
| O9 <sup>5</sup> Gd2 O10               | 87.97(11)  | C5 C4 S3                              | 112.4(3) |
| O9 <sup>5</sup> Gd2 O24               | 150.05(11) | C5 C4 C8                              | 127.0(4) |
| O9 <sup>5</sup> Gd2 O23               | 80.71(11)  | C8 C4 S3                              | 120.5(3) |
| O9 <sup>5</sup> Gd2 O23 <sup>4</sup>  | 157.22(10) | O36 C37 N38                           | 124.2(4) |
| O9 <sup>5</sup> Gd2 C22               | 171.09(12) | C4 C5 C6                              | 112.1(4) |
| O9 <sup>5</sup> Gd2 O32               | 111.12(12) | C26 C27 C28                           | 113.3(4) |
| O9 <sup>5</sup> Gd2 O43               | 74.56(12)  | C18 C17 C16                           | 112.3(4) |
| O9 <sup>5</sup> Gd2 O31 <sup>4</sup>  | 97.56(11)  | N38 C39 C40                           | 111.3(4) |
| O23 Gd2 Gd2 <sup>4</sup>              | 42.89(8)   | N38 C41 C42                           | 111.4(4) |
| O23 <sup>4</sup> Gd2 Gd2 <sup>4</sup> | 34.62(6)   | C44 N45 C46                           | 119.6(6) |
| O23 Gd2 O24                           | 126.40(11) | C44 N45 C48                           | 121.4(8) |
| O23 Gd2 O23 <sup>4</sup>              | 77.51(10)  | C48 N45 C46                           | 118.6(7) |
| O23 <sup>4</sup> Gd2 C22              | 25.19(10)  | C19 O21 Gd1                           | 135.8(3) |
| O23 Gd2 C22                           | 102.64(12) | C19 O20 Gd1 <sup>3</sup>              | 171.0(3) |
| O23 Gd2 O43                           | 134.89(11) | C11 O12 Gd1 <sup>2</sup>              | 137.0(3) |
| C22 Gd2 Gd2 <sup>4</sup>              | 59.77(9)   | O10 C8 O9                             | 124.6(4) |
| O32 Gd2 Gd2 <sup>4</sup>              | 67.73(8)   | O10 C8 C4                             | 118.6(4) |
| O32 Gd2 O24                           | 89.93(12)  | O9 C8 C4                              | 116.8(4) |
| O32 Gd2 O23 <sup>4</sup>              | 69.91(11)  | O35 C33 Gd1 <sup>1</sup>              | 54.4(2)  |
| O32 Gd2 O23                           | 76.12(11)  | O35 C33 C29                           | 119.3(4) |
| O32 Gd2 C22                           | 77.77(12)  | O35 C33 O34 <sup>7</sup>              | 120.6(4) |
| O32 Gd2 O43                           | 148.19(12) | C29 C33 Gd1 <sup>1</sup>              | 172.8(3) |
| O43 Gd2 Gd2 <sup>4</sup>              | 136.91(9)  | O34 <sup>7</sup> C33 Gd1 <sup>1</sup> | 66.4(2)  |
| O43 Gd2 O23 <sup>4</sup>              | 117.29(11) | O34 <sup>7</sup> C33 C29              | 120.2(4) |
| O43 Gd2 C22                           | 97.61(12)  | O43 C44 N45                           | 127.2(7) |
| O31 <sup>4</sup> Gd2 Gd2 <sup>4</sup> | 66.73(8)   | C47 C46 N45                           | 115.1(9) |
| O31 <sup>4</sup> Gd2 O24              | 80.70(11)  | N45 C48 C49                           | 113.0(8) |
| O31 <sup>4</sup> Gd2 O23 <sup>4</sup> | 70.18(10)  |                                       |          |

<sup>1</sup>2-X,2-Y,1-Z; <sup>2</sup>2-X,1-Y,1-Z; <sup>3</sup>2-X,+Y,3/2-Z; <sup>4</sup>1-X,2-Y,1-Z; <sup>5</sup>1-X,+Y,1/2-Z; <sup>6</sup>+X,-1+Y,+Z;  
<sup>7</sup>+X,1+Y,+Z<sup>1</sup>2-X,1-Y,1-Z; <sup>2</sup>2-X,2-Y,1-Z; <sup>3</sup>2-X,+Y,3/2-Z; <sup>4</sup>1-X,2-Y,1-Z; <sup>5</sup>1-X,+Y,1/2-Z; <sup>6</sup>+X,-  
1+Y,+Z; <sup>7</sup>+X,1+Y,+Z

---

7

|     |                  |           |     |                  |          |
|-----|------------------|-----------|-----|------------------|----------|
| Tb1 | Tb1 <sup>1</sup> | 3.9846(3) | C8  | O9 <sup>4</sup>  | 1.235(4) |
| Tb1 | O10              | 2.288(3)  | C8  | C4               | 1.482(5) |
| Tb1 | O9               | 2.312(2)  | O36 | C37              | 1.237(4) |
| Tb1 | O32              | 2.348(2)  | O12 | C11              | 1.261(4) |
| Tb1 | O32 <sup>1</sup> | 2.696(3)  | C19 | O20 <sup>3</sup> | 1.268(4) |
| Tb1 | O24              | 2.348(3)  | C19 | C15              | 1.478(5) |
| Tb1 | O23              | 2.363(2)  | O43 | C44              | 1.239(5) |
| Tb1 | O36              | 2.358(3)  | C4  | C5               | 1.366(5) |
| Tb1 | O31              | 2.399(2)  | O31 | C30              | 1.260(4) |
| Tb1 | C30              | 2.918(4)  | N38 | C37              | 1.322(5) |
| Tb2 | O21              | 2.293(3)  | N38 | C39              | 1.459(5) |
| Tb2 | O35              | 2.339(2)  | N38 | C41              | 1.472(5) |
| Tb2 | O20              | 2.264(2)  | C33 | O34 <sup>2</sup> | 1.261(4) |
| Tb2 | O13              | 2.333(3)  | C33 | C29              | 1.481(5) |
| Tb2 | O13 <sup>2</sup> | 2.883(3)  | C15 | C16              | 1.369(5) |
| Tb2 | O34              | 2.330(2)  | C26 | C30 <sup>5</sup> | 1.470(5) |
| Tb2 | O12              | 2.349(2)  | C26 | C27              | 1.376(5) |
| Tb2 | O43              | 2.431(3)  | C17 | C16              | 1.413(5) |
| Tb2 | C11              | 2.970(3)  | C17 | C18              | 1.363(5) |
| S3  | C4               | 1.720(3)  | C22 | O23 <sup>1</sup> | 1.267(4) |
| S3  | C7               | 1.719(4)  | C22 | C18 <sup>1</sup> | 1.493(5) |
| S14 | C15              | 1.727(4)  | C29 | C28              | 1.375(5) |
| S14 | C18              | 1.725(4)  | C18 | C22 <sup>1</sup> | 1.494(5) |
| S25 | C26              | 1.729(4)  | C30 | O32 <sup>1</sup> | 1.273(4) |
| S25 | C29              | 1.721(4)  | C30 | C26 <sup>5</sup> | 1.470(5) |
| O10 | C8               | 1.283(4)  | C27 | C28              | 1.402(5) |
| O21 | C19              | 1.244(4)  | C11 | O13 <sup>2</sup> | 1.269(4) |
| O35 | C33              | 1.253(4)  | C11 | C7               | 1.477(5) |



|     |                  |          |     |     |          |
|-----|------------------|----------|-----|-----|----------|
| O20 | C19 <sup>3</sup> | 1.268(4) | C6  | C7  | 1.364(5) |
| O9  | C8 <sup>4</sup>  | 1.235(4) | C6  | C5  | 1.420(5) |
| O32 | Tb1 <sup>1</sup> | 2.696(3) | C39 | C40 | 1.510(6) |
| O32 | C30 <sup>1</sup> | 1.273(4) | N45 | C44 | 1.317(6) |
| O24 | C22              | 1.255(4) | N45 | C46 | 1.502(7) |
| O13 | Tb2 <sup>2</sup> | 2.883(3) | N45 | C48 | 1.465(7) |
| O13 | C11 <sup>2</sup> | 1.269(4) | C41 | C42 | 1.518(6) |
| O34 | C33 <sup>2</sup> | 1.261(4) | C46 | C47 | 1.478(7) |
| O23 | C22 <sup>1</sup> | 1.267(4) | C49 | C48 | 1.495(8) |

|                  |     |                  |           |                  |     |                  |           |
|------------------|-----|------------------|-----------|------------------|-----|------------------|-----------|
| O10              | Tb1 | Tb1 <sup>1</sup> | 124.96(6) | C7               | S3  | C4               | 91.15(18) |
| O10              | Tb1 | O9               | 79.77(9)  | C18              | S14 | C15              | 90.95(17) |
| O10              | Tb1 | O32 <sup>1</sup> | 159.77(8) | C29              | S25 | C26              | 91.10(18) |
| O10              | Tb1 | O32              | 83.98(9)  | C8               | O10 | Tb1              | 136.2(2)  |
| O10              | Tb1 | O24              | 104.17(9) | C19              | O21 | Tb2              | 161.7(3)  |
| O10              | Tb1 | O23              | 96.60(9)  | C33              | O35 | Tb2              | 138.3(2)  |
| O10              | Tb1 | O36              | 78.20(9)  | C19 <sup>3</sup> | O20 | Tb2              | 137.7(2)  |
| O10              | Tb1 | O31              | 148.93(8) | C8 <sup>4</sup>  | O9  | Tb1              | 170.1(2)  |
| O10              | Tb1 | C30              | 173.59(9) | Tb1              | O32 | Tb1 <sup>1</sup> | 104.16(9) |
| O9               | Tb1 | Tb1 <sup>1</sup> | 137.59(6) | C30 <sup>1</sup> | O32 | Tb1              | 168.3(2)  |
| O9               | Tb1 | O32 <sup>1</sup> | 116.46(8) | C30 <sup>1</sup> | O32 | Tb1 <sup>1</sup> | 86.9(2)   |
| O9               | Tb1 | O32              | 137.86(9) | C22              | O24 | Tb1              | 137.7(2)  |
| O9               | Tb1 | O24              | 73.36(9)  | Tb2              | O13 | Tb2 <sup>2</sup> | 102.19(8) |
| O9               | Tb1 | O23              | 149.09(9) | C11 <sup>2</sup> | O13 | Tb2              | 176.0(2)  |
| O9               | Tb1 | O36              | 75.67(9)  | C11 <sup>2</sup> | O13 | Tb2 <sup>2</sup> | 81.3(2)   |
| O9               | Tb1 | O31              | 80.02(9)  | C33 <sup>2</sup> | O34 | Tb2              | 139.7(2)  |
| O9               | Tb1 | C30              | 97.82(9)  | C22 <sup>1</sup> | O23 | Tb1              | 135.7(2)  |
| O32 <sup>1</sup> | Tb1 | Tb1 <sup>1</sup> | 34.84(5)  | O10              | C8  | C4               | 116.1(3)  |
| O32              | Tb1 | Tb1 <sup>1</sup> | 41.00(6)  | O9 <sup>4</sup>  | C8  | O10              | 124.6(3)  |
| O32              | Tb1 | O32 <sup>1</sup> | 75.84(9)  | O9 <sup>4</sup>  | C8  | C4               | 119.3(3)  |
| O32              | Tb1 | O23              | 71.06(9)  | C37              | O36 | Tb1              | 132.7(2)  |
| O32              | Tb1 | O36              | 137.94(9) | C11              | O12 | Tb2              | 106.8(2)  |
| O32              | Tb1 | O31              | 126.41(9) | O21              | C19 | O20 <sup>3</sup> | 125.0(3)  |
| O32              | Tb1 | C30              | 101.60(9) | O21              | C19 | C15              | 118.1(3)  |
| O32 <sup>1</sup> | Tb1 | C30              | 25.81(8)  | O20 <sup>3</sup> | C19 | C15              | 116.8(3)  |
| O24              | Tb1 | Tb1 <sup>1</sup> | 67.59(6)  | C44              | O43 | Tb2              | 126.7(3)  |
| O24              | Tb1 | O32              | 73.43(9)  | C8               | C4  | S3               | 119.6(3)  |

|     |     |                  |           |                  |     |                  |           |
|-----|-----|------------------|-----------|------------------|-----|------------------|-----------|
| O24 | Tb1 | O32 <sup>1</sup> | 71.63(9)  | C5               | C4  | S3               | 112.2(3)  |
| O24 | Tb1 | O23              | 136.32(9) | C5               | C4  | C8               | 128.2(3)  |
| O24 | Tb1 | O36              | 147.90(9) | C30              | O31 | Tb1              | 101.2(2)  |
| O24 | Tb1 | O31              | 92.29(10) | C37              | N38 | C39              | 119.3(3)  |
| O24 | Tb1 | C30              | 80.63(10) | C37              | N38 | C41              | 120.8(3)  |
| O23 | Tb1 | Tb1 <sup>1</sup> | 68.98(6)  | C39              | N38 | C41              | 119.9(3)  |
| O23 | Tb1 | O32 <sup>1</sup> | 75.67(8)  | O35              | C33 | O34 <sup>2</sup> | 126.9(3)  |
| O23 | Tb1 | O31              | 88.85(9)  | O35              | C33 | C29              | 117.8(3)  |
| O23 | Tb1 | C30              | 82.39(9)  | O34 <sup>2</sup> | C33 | C29              | 115.4(3)  |
| O36 | Tb1 | Tb1 <sup>1</sup> | 137.43(6) | C19              | C15 | S14              | 121.2(3)  |
| O36 | Tb1 | O32 <sup>1</sup> | 116.23(8) | C16              | C15 | S14              | 111.8(3)  |
| O36 | Tb1 | O23              | 73.55(9)  | C16              | C15 | C19              | 126.9(3)  |
| O36 | Tb1 | O31              | 74.08(9)  | C30 <sup>5</sup> | C26 | S25              | 120.0(3)  |
| O36 | Tb1 | C30              | 95.47(10) | C27              | C26 | S25              | 111.9(3)  |
| O31 | Tb1 | Tb1 <sup>1</sup> | 85.55(6)  | C27              | C26 | C30 <sup>5</sup> | 128.1(3)  |
| O31 | Tb1 | O32 <sup>1</sup> | 50.85(8)  | C18              | C17 | C16              | 112.6(3)  |
| O31 | Tb1 | C30              | 25.06(9)  | C15              | C16 | C17              | 112.5(3)  |
| C30 | Tb1 | Tb1 <sup>1</sup> | 60.62(7)  | O24              | C22 | O23 <sup>1</sup> | 126.3(3)  |
| O21 | Tb2 | O35              | 73.42(9)  | O24              | C22 | C18 <sup>1</sup> | 116.0(3)  |
| O21 | Tb2 | O13 <sup>2</sup> | 114.04(8) | O23 <sup>1</sup> | C22 | C18 <sup>1</sup> | 117.6(3)  |
| O21 | Tb2 | O13              | 140.02(9) | C33              | C29 | S25              | 121.3(3)  |
| O21 | Tb2 | O34              | 145.28(9) | C28              | C29 | S25              | 111.7(3)  |
| O21 | Tb2 | O12              | 78.22(9)  | C28              | C29 | C33              | 126.8(3)  |
| O21 | Tb2 | O43              | 76.03(9)  | C17              | C18 | S14              | 112.1(3)  |
| O21 | Tb2 | C11              | 94.83(10) | C17              | C18 | C22 <sup>1</sup> | 126.8(3)  |
| O35 | Tb2 | O13 <sup>2</sup> | 69.35(8)  | C22 <sup>1</sup> | C18 | S14              | 121.1(3)  |
| O35 | Tb2 | O12              | 88.18(9)  | O32 <sup>1</sup> | C30 | Tb1              | 67.30(19) |
| O35 | Tb2 | O43              | 148.15(9) | O32 <sup>1</sup> | C30 | C26 <sup>5</sup> | 120.0(3)  |
| O35 | Tb2 | C11              | 76.37(10) | O31              | C30 | Tb1              | 53.75(17) |
| O20 | Tb2 | O21              | 87.97(9)  | O31              | C30 | O32 <sup>1</sup> | 121.0(3)  |
| O20 | Tb2 | O35              | 112.56(9) | O31              | C30 | C26 <sup>5</sup> | 119.0(3)  |
| O20 | Tb2 | O13 <sup>2</sup> | 156.63(8) | C26 <sup>5</sup> | C30 | Tb1              | 171.9(2)  |
| O20 | Tb2 | O13              | 80.11(9)  | C26              | C27 | C28              | 112.2(3)  |
| O20 | Tb2 | O34              | 97.20(9)  | O13 <sup>2</sup> | C11 | Tb2              | 73.67(19) |
| O20 | Tb2 | O12              | 150.80(9) | O13 <sup>2</sup> | C11 | C7               | 120.3(3)  |
| O20 | Tb2 | O43              | 74.79(9)  | O12              | C11 | Tb2              | 49.22(17) |
| O20 | Tb2 | C11              | 171.07(9) | O12              | C11 | O13 <sup>2</sup> | 122.4(3)  |

|                          |           |             |          |
|--------------------------|-----------|-------------|----------|
| O13 Tb2 O35              | 76.31(9)  | O12 C11 C7  | 117.3(3) |
| O13 Tb2 O13 <sup>2</sup> | 77.82(8)  | C7 C11 Tb2  | 164.1(3) |
| O13 Tb2 O12              | 126.35(9) | C7 C6 C5    | 112.6(3) |
| O13 Tb2 O43              | 134.96(9) | C29 C28 C27 | 113.1(3) |
| O13 Tb2 C11              | 102.80(9) | O36 C37 N38 | 122.9(4) |
| O13 <sup>2</sup> Tb2 C11 | 25.00(8)  | C11 C7 S3   | 117.8(3) |
| O34 Tb2 O35              | 133.40(9) | C6 C7 S3    | 112.0(3) |
| O34 Tb2 O13 <sup>2</sup> | 69.54(8)  | C6 C7 C11   | 130.2(3) |
| O34 Tb2 O13              | 74.47(9)  | N38 C39 C40 | 111.9(3) |
| O34 Tb2 O12              | 80.97(9)  | C44 N45 C46 | 120.2(4) |
| O34 Tb2 O43              | 72.37(9)  | C44 N45 C48 | 121.0(5) |
| O34 Tb2 C11              | 75.72(9)  | C48 N45 C46 | 118.5(4) |
| O12 Tb2 O13 <sup>2</sup> | 48.85(8)  | N38 C41 C42 | 111.0(3) |
| O12 Tb2 O43              | 76.95(9)  | C4 C5 C6    | 112.0(3) |
| O12 Tb2 C11              | 23.98(9)  | O43 C44 N45 | 126.5(5) |
| O43 Tb2 O13 <sup>2</sup> | 116.67(8) | C47 C46 N45 | 114.2(6) |
| O43 Tb2 C11              | 97.64(9)  | N45 C48 C49 | 114.1(5) |

<sup>1</sup>-X,2-Y,1-Z; <sup>2</sup>1-X,1-Y,1-Z; <sup>3</sup>1-X,+Y,3/2-Z; <sup>4</sup>-X,+Y,1/2-Z; <sup>5</sup>-X,1-Y,1-Z<sup>1</sup>-X,2-Y,1-Z; <sup>2</sup>1-X,1-Y,1-Z; <sup>3</sup>1-X,+Y,3/2-Z; <sup>4</sup>-X,+Y,1/2-Z; <sup>5</sup>-X,1-Y,1-Z

---

**8**

|                      |           |                      |          |
|----------------------|-----------|----------------------|----------|
| Dy1 Dy1 <sup>1</sup> | 3.9815(4) | C19 C15              | 1.481(6) |
| Dy1 O21              | 2.278(3)  | C8 O10 <sup>4</sup>  | 1.235(5) |
| Dy1 O20              | 2.304(3)  | C8 C4                | 1.478(6) |
| Dy1 O32              | 2.338(3)  | O23 C22 <sup>3</sup> | 1.266(5) |
| Dy1 O32 <sup>1</sup> | 2.708(3)  | O31 Dy1 <sup>6</sup> | 2.379(3) |
| Dy1 O13              | 2.333(3)  | O31 C30              | 1.261(5) |
| Dy1 O36              | 2.348(3)  | O43 C44              | 1.240(7) |
| Dy1 O12              | 2.353(3)  | N38 C37              | 1.322(6) |
| Dy1 O31 <sup>2</sup> | 2.379(3)  | N38 C39              | 1.451(6) |
| Dy1 C30 <sup>2</sup> | 2.913(4)  | N38 C41              | 1.467(6) |
| Dy2 O10              | 2.280(3)  | C15 C16              | 1.365(6) |
| Dy2 O9               | 2.249(3)  | C4 C5                | 1.366(6) |
| Dy2 O35              | 2.335(3)  | C7 C11               | 1.486(6) |
| Dy2 O34              | 2.316(3)  | C7 C6                | 1.366(6) |

|     |                  |          |     |                  |           |
|-----|------------------|----------|-----|------------------|-----------|
| Dy2 | O24 <sup>3</sup> | 2.881(3) | C26 | C30              | 1.475(6)  |
| Dy2 | O24              | 2.326(3) | C26 | C27              | 1.373(6)  |
| Dy2 | O23              | 2.327(3) | C29 | C33              | 1.485(6)  |
| Dy2 | O43              | 2.420(3) | C29 | C28              | 1.371(6)  |
| Dy2 | C22 <sup>3</sup> | 2.966(4) | C5  | C6               | 1.417(6)  |
| S3  | C4               | 1.734(4) | C11 | O12 <sup>1</sup> | 1.262(5)  |
| S3  | C7               | 1.729(4) | C33 | O35 <sup>3</sup> | 1.252(5)  |
| S14 | C15              | 1.725(4) | C18 | C22 <sup>7</sup> | 1.471(6)  |
| S14 | C18              | 1.722(4) | C18 | C17              | 1.366(6)  |
| S25 | C26              | 1.730(4) | C22 | Dy2 <sup>3</sup> | 2.966(4)  |
| S25 | C29              | 1.721(4) | C22 | O23 <sup>3</sup> | 1.266(5)  |
| O10 | C8 <sup>4</sup>  | 1.235(5) | C22 | C18 <sup>8</sup> | 1.471(6)  |
| O21 | C19 <sup>5</sup> | 1.266(5) | C30 | Dy1 <sup>6</sup> | 2.913(4)  |
| O9  | C8               | 1.277(5) | C30 | O32 <sup>5</sup> | 1.268(5)  |
| O20 | C19              | 1.247(5) | C27 | C28              | 1.403(6)  |
| O32 | Dy1 <sup>1</sup> | 2.708(3) | C16 | C17              | 1.409(6)  |
| O32 | C30 <sup>5</sup> | 1.269(5) | C39 | C40              | 1.511(7)  |
| O35 | C33 <sup>3</sup> | 1.252(5) | C41 | C42              | 1.515(7)  |
| O13 | C11              | 1.256(5) | N45 | C44              | 1.328(8)  |
| O34 | C33              | 1.254(5) | N45 | C46              | 1.507(9)  |
| O36 | C37              | 1.240(5) | N45 | C48              | 1.471(9)  |
| O24 | Dy2 <sup>3</sup> | 2.881(3) | C46 | C47              | 1.463(10) |
| O24 | C22              | 1.263(5) | C49 | C48              | 1.474(12) |
| O12 | C11 <sup>1</sup> | 1.262(5) | O2  | O2 <sup>4</sup>  | 0.0(2)    |
| C19 | O21 <sup>5</sup> | 1.266(5) |     |                  |           |

|     |     |                  |            |                  |     |                  |            |
|-----|-----|------------------|------------|------------------|-----|------------------|------------|
| O21 | Dy1 | Dy1 <sup>1</sup> | 124.98(7)  | C7               | S3  | C4               | 91.3(2)    |
| O21 | Dy1 | O20              | 79.63(10)  | C18              | S14 | C15              | 91.1(2)    |
| O21 | Dy1 | O32 <sup>1</sup> | 159.66(10) | C29              | S25 | C26              | 90.9(2)    |
| O21 | Dy1 | O32              | 83.69(11)  | C8 <sup>4</sup>  | O10 | Dy2              | 161.8(3)   |
| O21 | Dy1 | O13              | 104.65(11) | C19 <sup>5</sup> | O21 | Dy1              | 136.4(3)   |
| O21 | Dy1 | O36              | 78.38(11)  | C8               | O9  | Dy2              | 138.0(3)   |
| O21 | Dy1 | O12              | 96.47(11)  | C19              | O20 | Dy1              | 170.4(3)   |
| O21 | Dy1 | O31 <sup>2</sup> | 149.05(10) | Dy1              | O32 | Dy1 <sup>1</sup> | 103.94(10) |
| O21 | Dy1 | C30 <sup>2</sup> | 173.67(11) | C30 <sup>5</sup> | O32 | Dy1              | 169.5(3)   |
| O20 | Dy1 | Dy1 <sup>1</sup> | 137.60(8)  | C30 <sup>5</sup> | O32 | Dy1 <sup>1</sup> | 86.2(3)    |
| O20 | Dy1 | O32              | 137.21(11) | C33 <sup>3</sup> | O35 | Dy2              | 137.9(3)   |

|                  |     |                  |            |                  |     |                  |            |
|------------------|-----|------------------|------------|------------------|-----|------------------|------------|
| O20              | Dy1 | O32 <sup>1</sup> | 116.87(10) | C11              | O13 | Dy1              | 137.8(3)   |
| O20              | Dy1 | O13              | 73.21(11)  | C33              | O34 | Dy2              | 139.9(3)   |
| O20              | Dy1 | O36              | 75.74(11)  | C37              | O36 | Dy1              | 132.8(3)   |
| O20              | Dy1 | O12              | 149.34(10) | Dy2              | O24 | Dy2 <sup>3</sup> | 102.14(10) |
| O20              | Dy1 | O31 <sup>2</sup> | 80.16(11)  | C22              | O24 | Dy2 <sup>3</sup> | 81.3(3)    |
| O20              | Dy1 | C30 <sup>2</sup> | 98.10(11)  | C22              | O24 | Dy2              | 176.1(3)   |
| O32 <sup>1</sup> | Dy1 | Dy1 <sup>1</sup> | 34.75(6)   | C11 <sup>1</sup> | O12 | Dy1              | 135.7(3)   |
| O32              | Dy1 | Dy1 <sup>1</sup> | 41.31(8)   | O21 <sup>5</sup> | C19 | C15              | 117.3(4)   |
| O32              | Dy1 | O32 <sup>1</sup> | 76.06(11)  | O20              | C19 | O21 <sup>5</sup> | 125.0(4)   |
| O32              | Dy1 | O36              | 138.31(11) | O20              | C19 | C15              | 117.7(4)   |
| O32              | Dy1 | O12              | 71.33(11)  | O10 <sup>4</sup> | C8  | O9               | 125.4(4)   |
| O32              | Dy1 | O31 <sup>2</sup> | 126.65(11) | O10 <sup>4</sup> | C8  | C4               | 118.8(4)   |
| O32 <sup>1</sup> | Dy1 | C30 <sup>2</sup> | 25.75(10)  | O9               | C8  | C4               | 115.8(4)   |
| O32              | Dy1 | C30 <sup>2</sup> | 101.78(11) | C22 <sup>3</sup> | O23 | Dy2              | 107.6(3)   |
| O13              | Dy1 | Dy1 <sup>1</sup> | 67.52(8)   | C30              | O31 | Dy1 <sup>6</sup> | 101.9(3)   |
| O13              | Dy1 | O32              | 73.42(11)  | C44              | O43 | Dy2              | 126.6(4)   |
| O13              | Dy1 | O32 <sup>1</sup> | 71.60(11)  | C37              | N38 | C39              | 119.6(4)   |
| O13              | Dy1 | O36              | 147.60(11) | C37              | N38 | C41              | 120.6(4)   |
| O13              | Dy1 | O12              | 136.22(11) | C39              | N38 | C41              | 119.8(4)   |
| O13              | Dy1 | O31 <sup>2</sup> | 91.58(12)  | C19              | C15 | S14              | 118.7(3)   |
| O13              | Dy1 | C30 <sup>2</sup> | 80.16(12)  | C16              | C15 | S14              | 111.6(3)   |
| O36              | Dy1 | Dy1 <sup>1</sup> | 137.34(8)  | C16              | C15 | C19              | 129.7(4)   |
| O36              | Dy1 | O32 <sup>1</sup> | 115.88(10) | C8               | C4  | S3               | 120.5(3)   |
| O36              | Dy1 | O12              | 73.70(10)  | C5               | C4  | S3               | 111.4(3)   |
| O36              | Dy1 | O31 <sup>2</sup> | 74.07(11)  | C5               | C4  | C8               | 128.0(4)   |
| O36              | Dy1 | C30 <sup>2</sup> | 95.35(12)  | C11              | C7  | S3               | 121.4(3)   |
| O12              | Dy1 | Dy1 <sup>1</sup> | 68.91(7)   | C6               | C7  | S3               | 111.7(3)   |
| O12              | Dy1 | O32 <sup>1</sup> | 75.37(10)  | C6               | C7  | C11              | 126.9(4)   |
| O12              | Dy1 | O31 <sup>2</sup> | 89.17(11)  | C30              | C26 | S25              | 119.8(3)   |
| O12              | Dy1 | C30 <sup>2</sup> | 82.45(11)  | C27              | C26 | S25              | 112.0(3)   |
| O31 <sup>2</sup> | Dy1 | Dy1 <sup>1</sup> | 85.44(7)   | C27              | C26 | C30              | 128.1(4)   |
| O31 <sup>2</sup> | Dy1 | O32 <sup>1</sup> | 50.79(9)   | C33              | C29 | S25              | 121.2(3)   |
| O31 <sup>2</sup> | Dy1 | C30 <sup>2</sup> | 25.06(11)  | C28              | C29 | S25              | 111.8(3)   |
| C30 <sup>2</sup> | Dy1 | Dy1 <sup>1</sup> | 60.48(8)   | C28              | C29 | C33              | 126.9(4)   |
| O10              | Dy2 | O35              | 73.28(11)  | C4               | C5  | C6               | 112.9(4)   |
| O10              | Dy2 | O34              | 145.56(11) | O13              | C11 | O12 <sup>1</sup> | 126.6(4)   |
| O10              | Dy2 | O24              | 139.66(11) | O13              | C11 | C7               | 115.8(4)   |

|                  |     |                  |            |                  |     |                  |          |
|------------------|-----|------------------|------------|------------------|-----|------------------|----------|
| O10              | Dy2 | O24 <sup>3</sup> | 114.17(10) | O12 <sup>1</sup> | C11 | C7               | 117.5(4) |
| O10              | Dy2 | O23              | 78.46(11)  | C7               | C6  | C5               | 112.7(4) |
| O10              | Dy2 | O43              | 75.79(11)  | O35 <sup>3</sup> | C33 | O34              | 127.0(4) |
| O10              | Dy2 | C22 <sup>3</sup> | 95.05(12)  | O35 <sup>3</sup> | C33 | C29              | 117.5(4) |
| O9               | Dy2 | O10              | 87.52(11)  | O34              | C33 | C29              | 115.5(4) |
| O9               | Dy2 | O35              | 111.97(11) | C22 <sup>7</sup> | C18 | S14              | 117.7(3) |
| O9               | Dy2 | O34              | 97.91(11)  | C17              | C18 | S14              | 112.0(3) |
| O9               | Dy2 | O24              | 80.01(11)  | C17              | C18 | C22 <sup>7</sup> | 130.3(4) |
| O9               | Dy2 | O24 <sup>3</sup> | 156.74(10) | O24              | C22 | Dy2 <sup>3</sup> | 73.8(2)  |
| O9               | Dy2 | O23              | 151.20(11) | O24              | C22 | O23 <sup>3</sup> | 121.7(4) |
| O9               | Dy2 | O43              | 75.18(11)  | O24              | C22 | C18 <sup>8</sup> | 120.6(4) |
| O9               | Dy2 | C22 <sup>3</sup> | 171.72(12) | O23 <sup>3</sup> | C22 | Dy2 <sup>3</sup> | 48.4(2)  |
| O35              | Dy2 | O24 <sup>3</sup> | 69.41(10)  | O23 <sup>3</sup> | C22 | C18 <sup>8</sup> | 117.7(4) |
| O35              | Dy2 | O43              | 147.77(12) | C18 <sup>8</sup> | C22 | Dy2 <sup>3</sup> | 164.3(3) |
| O35              | Dy2 | C22 <sup>3</sup> | 76.30(12)  | O32 <sup>5</sup> | C30 | Dy1 <sup>6</sup> | 68.1(2)  |
| O34              | Dy2 | O35              | 133.24(11) | O32 <sup>5</sup> | C30 | C26              | 119.5(4) |
| O34              | Dy2 | O24 <sup>3</sup> | 69.32(10)  | O31              | C30 | Dy1 <sup>6</sup> | 53.0(2)  |
| O34              | Dy2 | O24              | 74.56(11)  | O31              | C30 | O32 <sup>5</sup> | 121.0(4) |
| O34              | Dy2 | O23              | 80.89(11)  | O31              | C30 | C26              | 119.5(4) |
| O34              | Dy2 | O43              | 72.89(11)  | C26              | C30 | Dy1 <sup>6</sup> | 171.6(3) |
| O34              | Dy2 | C22 <sup>3</sup> | 75.56(11)  | C26              | C27 | C28              | 112.0(4) |
| O24              | Dy2 | O35              | 76.22(11)  | C15              | C16 | C17              | 112.9(4) |
| O24              | Dy2 | O24 <sup>3</sup> | 77.87(10)  | O36              | C37 | N38              | 123.0(4) |
| O24              | Dy2 | O23              | 126.33(11) | C18              | C17 | C16              | 112.4(4) |
| O24              | Dy2 | O43              | 135.38(11) | C29              | C28 | C27              | 113.2(4) |
| O24 <sup>3</sup> | Dy2 | C22 <sup>3</sup> | 24.88(10)  | N38              | C39 | C40              | 111.6(4) |
| O24              | Dy2 | C22 <sup>3</sup> | 102.74(12) | N38              | C41 | C42              | 111.6(4) |
| O23              | Dy2 | O35              | 88.09(11)  | C44              | N45 | C46              | 119.7(6) |
| O23              | Dy2 | O24 <sup>3</sup> | 48.75(10)  | C44              | N45 | C48              | 120.4(7) |
| O23              | Dy2 | O43              | 77.03(11)  | C48              | N45 | C46              | 119.7(6) |
| O23              | Dy2 | C22 <sup>3</sup> | 24.00(11)  | O43              | C44 | N45              | 126.6(6) |
| O43              | Dy2 | O24 <sup>3</sup> | 116.80(10) | C47              | C46 | N45              | 115.3(8) |
| O43              | Dy2 | C22 <sup>3</sup> | 97.80(12)  | N45              | C48 | C49              | 114.3(7) |

<sup>1</sup>-X,2-Y,-Z; <sup>2</sup>+X,2-Y,-1/2+Z; <sup>3</sup>1-X,1-Y,1-Z; <sup>4</sup>1-X,+Y,1/2-Z; <sup>5</sup>-X,+Y,1/2-Z; <sup>6</sup>+X,2-Y,1/2+Z;  
<sup>7</sup>+X,1+Y,+Z; <sup>8</sup>+X,-1+Y,+Z  
<sup>1</sup>-X,2-Y,-Z; <sup>2</sup>+X,2-Y,-1/2+Z; <sup>3</sup>1-X,1-Y,1-Z; <sup>4</sup>1-X,+Y,1/2-Z; <sup>5</sup>-  
X,+Y,1/2-Z; <sup>6</sup>+X,2-Y,1/2+Z; <sup>7</sup>+X,1+Y,+Z; <sup>8</sup>+X,-1+Y,+Z

---

|                      |           |                       |           |
|----------------------|-----------|-----------------------|-----------|
| Yb1 Yb1 <sup>1</sup> | 4.1121(7) | C17 C16               | 1.392(12) |
| Yb1 O13 <sup>2</sup> | 2.214(6)  | C17 C18               | 1.364(12) |
| Yb1 O24 <sup>3</sup> | 2.298(6)  | C30 O31               | 1.278(10) |
| Yb1 C33 <sup>4</sup> | 2.995(9)  | C30 C26               | 1.496(11) |
| Yb1 O34 <sup>4</sup> | 2.270(6)  | O34 Yb1 <sup>10</sup> | 2.270(6)  |
| Yb1 O35 <sup>4</sup> | 3.056(7)  | C4 C8                 | 1.493(12) |
| Yb1 O35 <sup>5</sup> | 2.248(6)  | C4 C5                 | 1.370(12) |
| Yb1 O23 <sup>6</sup> | 2.263(6)  | O36 C37               | 1.237(11) |
| Yb1 O43              | 2.370(7)  | C22 O23               | 1.253(10) |
| Yb1 O12              | 2.203(6)  | C22 C18               | 1.492(11) |
| Yb2 Yb2 <sup>7</sup> | 4.0162(7) | N38 C39               | 1.454(12) |
| Yb2 O32              | 2.253(6)  | N38 C37               | 1.318(11) |
| Yb2 O10              | 2.297(6)  | N38 C41               | 1.466(12) |
| Yb2 O36              | 2.289(6)  | C19 O21               | 1.251(10) |
| Yb2 C19              | 2.942(8)  | C19 O20               | 1.250(10) |
| Yb2 O31 <sup>8</sup> | 2.235(6)  | C19 C15               | 1.481(11) |
| Yb2 O21              | 2.831(6)  | O35 Yb1 <sup>10</sup> | 3.056(7)  |
| Yb2 O21 <sup>7</sup> | 2.271(6)  | O35 Yb1 <sup>5</sup>  | 2.248(6)  |
| Yb2 O20              | 2.321(6)  | C27 C26               | 1.355(12) |
| Yb2 O9 <sup>7</sup>  | 2.274(6)  | C27 C28               | 1.416(13) |
| S3 C4                | 1.716(9)  | C39 C40               | 1.511(15) |
| S3 C7                | 1.718(9)  | C8 O9                 | 1.250(10) |
| S14 C18              | 1.731(9)  | O31 Yb2 <sup>8</sup>  | 2.235(6)  |
| S14 C15              | 1.725(9)  | O21 Yb2 <sup>7</sup>  | 2.271(6)  |
| S25 C26              | 1.724(8)  | O23 Yb1 <sup>6</sup>  | 2.263(6)  |
| S25 C29              | 1.709(9)  | O43 C44               | 1.179(17) |
| O32 C30              | 1.237(10) | C7 C6                 | 1.382(12) |
| N11 O13              | 1.239(10) | C16 C15               | 1.362(12) |
| N11 O12              | 1.271(11) | C6 C5                 | 1.402(12) |
| N11 C7               | 1.482(11) | C29 C28               | 1.365(12) |
| O13 Yb1 <sup>2</sup> | 2.214(6)  | C41 C42               | 1.519(15) |
| O24 Yb1 <sup>9</sup> | 2.298(6)  | C45 C44               | 1.37(2)   |

|                       |           |                     |          |
|-----------------------|-----------|---------------------|----------|
| O24 C22               | 1.234(10) | C45 C46             | 1.52(2)  |
| O10 C8                | 1.263(10) | C45 C48             | 1.44(2)  |
| C33 Yb1 <sup>10</sup> | 2.995(9)  | O9 Yb2 <sup>7</sup> | 2.274(6) |
| C33 O34               | 1.245(11) | C46 C47             | 1.46(3)  |
| C33 O35               | 1.261(11) | C49 C48             | 1.51(3)  |
| C33 C29               | 1.493(12) |                     |          |

|                                       |            |                           |          |
|---------------------------------------|------------|---------------------------|----------|
| O13 <sup>1</sup> Yb1 Yb1 <sup>2</sup> | 136.10(16) | O9 <sup>7</sup> Yb2 O36   | 147.0(2) |
| O13 <sup>1</sup> Yb1 O24 <sup>3</sup> | 73.6(2)    | O9 <sup>7</sup> Yb2 C19   | 77.6(2)  |
| O13 <sup>1</sup> Yb1 C33 <sup>4</sup> | 96.7(2)    | O9 <sup>7</sup> Yb2 O21   | 69.6(2)  |
| O13 <sup>1</sup> Yb1 O34 <sup>4</sup> | 80.4(2)    | O9 <sup>7</sup> Yb2 O20   | 88.0(2)  |
| O13 <sup>1</sup> Yb1 O35 <sup>4</sup> | 115.7(2)   | C4 S3 C7                  | 91.5(4)  |
| O13 <sup>1</sup> Yb1 O35 <sup>5</sup> | 136.7(3)   | C15 S14 C18               | 91.3(4)  |
| O13 <sup>1</sup> Yb1 O23 <sup>6</sup> | 147.0(2)   | C29 S25 C26               | 91.0(4)  |
| O13 <sup>1</sup> Yb1 O43              | 76.4(2)    | C30 O32 Yb2               | 168.8(6) |
| O24 <sup>3</sup> Yb1 Yb1 <sup>2</sup> | 66.15(16)  | O13 N11 O12               | 124.7(8) |
| O24 <sup>3</sup> Yb1 C33 <sup>4</sup> | 74.1(2)    | O13 N11 C7                | 118.3(8) |
| O24 <sup>3</sup> Yb1 O35 <sup>4</sup> | 68.7(2)    | O12 N11 C7                | 117.0(8) |
| O24 <sup>3</sup> Yb1 O43              | 147.5(2)   | N11 O13 Yb1 <sup>1</sup>  | 159.8(6) |
| C33 <sup>4</sup> Yb1 Yb1 <sup>2</sup> | 56.53(17)  | C22 O24 Yb1 <sup>9</sup>  | 137.9(6) |
| C33 <sup>4</sup> Yb1 O35 <sup>4</sup> | 24.0(2)    | C8 O10 Yb2                | 136.2(5) |
| O34 <sup>4</sup> Yb1 Yb1 <sup>2</sup> | 78.82(17)  | O34 C33 Yb1 <sup>10</sup> | 44.0(4)  |
| O34 <sup>4</sup> Yb1 O24 <sup>3</sup> | 84.1(2)    | O34 C33 O35               | 124.3(8) |
| O34 <sup>4</sup> Yb1 C33 <sup>4</sup> | 22.4(2)    | O34 C33 C29               | 117.5(8) |
| O34 <sup>4</sup> Yb1 O35 <sup>4</sup> | 46.3(2)    | O35 C33 Yb1 <sup>10</sup> | 80.7(5)  |
| O34 <sup>4</sup> Yb1 O43              | 78.9(2)    | O35 C33 C29               | 118.2(8) |
| O35 <sup>5</sup> Yb1 Yb1 <sup>2</sup> | 46.94(18)  | C29 C33 Yb1 <sup>10</sup> | 160.4(6) |
| O35 <sup>4</sup> Yb1 Yb1 <sup>2</sup> | 32.51(11)  | C18 C17 C16               | 114.6(9) |
| O35 <sup>5</sup> Yb1 O24 <sup>3</sup> | 75.8(2)    | O32 C30 O31               | 126.2(7) |
| O35 <sup>5</sup> Yb1 C33 <sup>4</sup> | 103.5(2)   | O32 C30 C26               | 118.3(7) |
| O35 <sup>5</sup> Yb1 O34 <sup>4</sup> | 125.8(2)   | O31 C30 C26               | 115.5(7) |
| O35 <sup>5</sup> Yb1 O35 <sup>4</sup> | 79.4(2)    | C33 O34 Yb1 <sup>10</sup> | 113.6(6) |
| O35 <sup>5</sup> Yb1 O23 <sup>6</sup> | 76.0(2)    | C8 C4 S3                  | 121.5(6) |
| O35 <sup>5</sup> Yb1 O43              | 136.4(2)   | C5 C4 S3                  | 111.2(7) |
| O23 <sup>6</sup> Yb1 Yb1 <sup>2</sup> | 65.15(16)  | C5 C4 C8                  | 127.2(8) |
| O23 <sup>6</sup> Yb1 O24 <sup>3</sup> | 130.9(2)   | C37 O36 Yb2               | 133.0(6) |
| O23 <sup>6</sup> Yb1 C33 <sup>4</sup> | 74.5(2)    | O24 C22 O23               | 129.0(8) |



|                                       |            |                                        |          |
|---------------------------------------|------------|----------------------------------------|----------|
| O23 <sup>6</sup> Yb1 O34 <sup>4</sup> | 81.0(2)    | O24 C22 C18                            | 117.4(8) |
| O23 <sup>6</sup> Yb1 O35 <sup>4</sup> | 67.2(2)    | O23 C22 C18                            | 113.6(8) |
| O23 <sup>6</sup> Yb1 O43              | 73.4(2)    | C39 N38 C41                            | 119.6(8) |
| O43 Yb1 Yb1 <sup>2</sup>              | 135.31(18) | C37 N38 C39                            | 119.7(8) |
| O43 Yb1 C33 <sup>4</sup>              | 97.5(2)    | C37 N38 C41                            | 120.7(8) |
| O43 Yb1 O35 <sup>4</sup>              | 115.1(2)   | O21 C19 Yb2                            | 72.6(5)  |
| O12 Yb1 Yb1 <sup>2</sup>              | 125.00(18) | O21 C19 C15                            | 119.3(8) |
| O12 Yb1 O13 <sup>1</sup>              | 87.1(2)    | O20 C19 Yb2                            | 48.9(4)  |
| O12 Yb1 O24 <sup>3</sup>              | 114.8(2)   | O20 C19 O21                            | 121.5(8) |
| O12 Yb1 C33 <sup>4</sup>              | 171.1(2)   | O20 C19 C15                            | 119.1(7) |
| O12 Yb1 O34 <sup>4</sup>              | 153.5(3)   | C15 C19 Yb2                            | 167.5(6) |
| O12 Yb1 O35 <sup>4</sup>              | 156.1(2)   | Yb1 <sup>5</sup> O35 Yb1 <sup>10</sup> | 100.6(2) |
| O12 Yb1 O35 <sup>5</sup>              | 78.8(2)    | C33 O35 Yb1 <sup>10</sup>              | 75.3(5)  |
| O12 Yb1 O23 <sup>6</sup>              | 97.9(2)    | C33 O35 Yb1 <sup>5</sup>               | 175.2(7) |
| O12 Yb1 O43                           | 75.5(3)    | C26 C27 C28                            | 111.0(8) |
| O32 Yb2 Yb2 <sup>7</sup>              | 137.06(15) | N38 C39 C40                            | 110.7(9) |
| O32 Yb2 O10                           | 150.5(2)   | O36 C37 N38                            | 123.7(8) |
| O32 Yb2 O36                           | 76.3(2)    | O10 C8 C4                              | 117.5(7) |
| O32 Yb2 C19                           | 100.0(2)   | O9 C8 O10                              | 126.7(8) |
| O32 Yb2 O21                           | 117.87(19) | O9 C8 C4                               | 115.8(7) |
| O32 Yb2 O21 <sup>7</sup>              | 135.4(2)   | C30 O31 Yb2 <sup>8</sup>               | 136.7(5) |
| O32 Yb2 O20                           | 82.4(2)    | Yb2 <sup>7</sup> O21 Yb2               | 103.3(2) |
| O32 Yb2 O9 <sup>7</sup>               | 73.4(2)    | C19 O21 Yb2                            | 82.5(5)  |
| O10 Yb2 Yb2 <sup>7</sup>              | 68.13(15)  | C19 O21 Yb2 <sup>7</sup>               | 173.8(6) |
| O10 Yb2 C19                           | 80.7(2)    | C22 O23 Yb1 <sup>6</sup>               | 140.3(6) |
| O10 Yb2 O21                           | 73.81(19)  | C44 O43 Yb1                            | 128.5(8) |
| O10 Yb2 O20                           | 88.1(2)    | C19 O20 Yb2                            | 107.1(5) |
| O36 Yb2 Yb2 <sup>7</sup>              | 136.52(15) | N11 O12 Yb1                            | 141.2(6) |
| O36 Yb2 O10                           | 74.3(2)    | N11 C7 S3                              | 120.9(7) |
| O36 Yb2 C19                           | 95.2(2)    | C6 C7 S3                               | 112.0(6) |
| O36 Yb2 O21                           | 115.1(2)   | C6 C7 N11                              | 127.1(8) |
| O36 Yb2 O20                           | 75.3(2)    | C30 C26 S25                            | 119.4(6) |
| C19 Yb2 Yb2 <sup>7</sup>              | 58.29(16)  | C27 C26 S25                            | 112.9(6) |
| O31 <sup>8</sup> Yb2 Yb2 <sup>7</sup> | 125.55(15) | C27 C26 C30                            | 127.7(8) |
| O31 <sup>8</sup> Yb2 O32              | 80.0(2)    | C15 C16 C17                            | 112.0(8) |
| O31 <sup>8</sup> Yb2 O10              | 96.4(2)    | C17 C18 S14                            | 110.1(7) |
| O31 <sup>8</sup> Yb2 O36              | 78.9(2)    | C17 C18 C22                            | 127.9(8) |

|                                       |            |                        |           |
|---------------------------------------|------------|------------------------|-----------|
| O31 <sup>8</sup> Yb2 C19              | 174.0(2)   | C22 C18 S14            | 121.8(7)  |
| O31 <sup>8</sup> Yb2 O21 <sup>7</sup> | 82.3(2)    | C7 C6 C5               | 111.4(8)  |
| O31 <sup>8</sup> Yb2 O21              | 158.72(19) | C33 C29 S25            | 118.1(7)  |
| O31 <sup>8</sup> Yb2 O20              | 151.5(2)   | C28 C29 S25            | 111.5(7)  |
| O31 <sup>8</sup> Yb2 O9 <sup>7</sup>  | 108.0(2)   | C28 C29 C33            | 130.3(8)  |
| O21 <sup>7</sup> Yb2 Yb2 <sup>7</sup> | 43.31(16)  | C4 C5 C6               | 113.8(8)  |
| O21 Yb2 Yb2 <sup>7</sup>              | 33.38(12)  | C29 C28 C27            | 113.5(8)  |
| O21 <sup>7</sup> Yb2 O10              | 71.9(2)    | N38 C41 C42            | 111.9(8)  |
| O21 <sup>7</sup> Yb2 O36              | 138.9(2)   | C19 C15 S14            | 121.2(6)  |
| O21 Yb2 C19                           | 24.9(2)    | C16 C15 S14            | 111.9(6)  |
| O21 <sup>7</sup> Yb2 C19              | 101.6(2)   | C16 C15 C19            | 126.9(8)  |
| O21 <sup>7</sup> Yb2 O21              | 76.7(2)    | C44 C45 C46            | 119.4(13) |
| O21 <sup>7</sup> Yb2 O20              | 125.5(2)   | C44 C45 C48            | 120.7(17) |
| O21 <sup>7</sup> Yb2 O9 <sup>7</sup>  | 73.8(2)    | C48 C45 C46            | 119.3(15) |
| O20 Yb2 Yb2 <sup>7</sup>              | 82.22(15)  | C8 O9 Yb2 <sup>7</sup> | 140.2(6)  |
| O20 Yb2 C19                           | 24.0(2)    | O43 C44 C45            | 125.6(15) |
| O20 Yb2 O21                           | 48.88(19)  | C47 C46 C45            | 121(2)    |
| O9 <sup>7</sup> Yb2 Yb2 <sup>7</sup>  | 66.22(15)  | C45 C48 C49            | 114.5(18) |
| O9 <sup>7</sup> Yb2 O10               | 134.3(2)   |                        |           |

<sup>1</sup>1-X,+Y,1/2-Z; <sup>2</sup>1-X,-Y,-Z; <sup>3</sup>-1+X,-Y,-1/2+Z; <sup>4</sup>-1+X,+Y,-1+Z; <sup>5</sup>2-X,-Y,1-Z; <sup>6</sup>2-X,+Y,1/2-Z; <sup>7</sup>2-X,1-Y,1-Z; <sup>8</sup>2-X,+Y,3/2-Z; <sup>9</sup>1+X,-Y,1/2+Z; <sup>10</sup>1+X,+Y,1+Z <sup>1</sup>1-X,-Y,-Z; <sup>2</sup>1-X,+Y,1/2-Z; <sup>3</sup>-1+X,-Y,-1/2+Z; <sup>4</sup>-1+X,+Y,-1+Z; <sup>5</sup>2-X,-Y,1-Z; <sup>6</sup>2-X,+Y,1/2-Z; <sup>7</sup>2-X,1-Y,1-Z; <sup>8</sup>2-X,+Y,3/2-Z; <sup>9</sup>1+X,-Y,1/2+Z; <sup>10</sup>1+X,+Y,1+Z

---

Symmetry transformations used to generate equivalent atoms:#1 -x+1,y,-z+2 #2 x,y-1,z+1 #3 x,y-1,z #4 -x+3/2,y-1/2,-z+1 #5 x,y,z+1 #6 -x+1,y,-z+1 #7 -x+3/2,y+1/2,-z+1 #8+3/2,y+1/2,-z #9 x,y+1,z #10 x,y,z-1 #11 x,y+1,z-1 #12 -x+3/2,y-1/2,-z

**Table S2. Hydrogen bonds for CPs 1-9 [Å and °].**

| D-H...A                  | d(D-H)  | d(H...A) | d(D...A)  | (DHA)   |
|--------------------------|---------|----------|-----------|---------|
|                          |         | <b>1</b> |           |         |
| C(4)-H(4)...O(17)#4      | 0.93    | 2.48     | 3.38(2)   | 163.6   |
| C(4)-H(4)...S(5)#4       | 0.93    | 3.00     | 3.630(17) | 126.6   |
| C(9)-H(9)...O(11)#5      | 0.93    | 2.65     | 3.45(2)   | 144.6   |
| C(21)-H(21)...S(1)       | 0.93    | 2.82     | 3.468(17) | 127.6   |
| C(27)-H(27)...S(7)       | 0.93    | 2.88     | 3.344(19) | 112.5   |
| C(34)-H(34)...O(8)       | 0.93    | 2.54     | 3.415(19) | 155.8   |
| C(40)-H(40)...S(6)#8     | 0.93    | 2.89     | 3.546(18) | 128.7   |
| C(45)-H(45)...S(4)       | 0.93    | 2.93     | 3.371(16) | 110.4   |
| C(46)-H(46)...S(4)       | 0.93    | 2.88     | 3.350(17) | 113.0   |
| C(52)-H(52)...O(31)#9    | 0.93    | 2.56     | 3.43(2)   | 156.5   |
| O(19)-H(19A)...O(35)#7   | 0.86(3) | 2.33(12) | 2.815(17) | 115(11) |
| O(19)-H(19B)...O(6)      | 0.86(3) | 1.92(6)  | 2.732(17) | 156(13) |
| O(42)-H(42A)...O(30)#9   | 0.86(3) | 2.15(15) | 2.815(17) | 134(18) |
| O(42)-H(42B)...O(24)#11  | 0.86(3) | 2.47(15) | 2.899(18) | 112(13) |
| O(44)-H(44A)...O(11)#5   | 0.85(3) | 2.35(8)  | 3.104(18) | 147(13) |
| O(44)-H(44A)...O(12)#5   | 0.85(3) | 2.55(8)  | 3.321(17) | 152(14) |
| O(44)-H(44B)...O(15)#10  | 0.85(3) | 1.99(7)  | 2.797(16) | 158(16) |
| C(57')-H(57F)...S(1)#2   | 0.96    | 2.88     | 3.39(9)   | 114.9   |
| C(59')-H(59D)...O(17)#2  | 0.96    | 2.01     | 2.91(6)   | 156.0   |
| C(59')-H(59E)...O(1)#2   | 0.96    | 2.01     | 2.95(7)   | 164.5   |
| C(65)-H(65)...O(22)      | 0.93    | 2.58     | 3.10(4)   | 115.5   |
| C(69)-H(69A)...S(8)#2    | 0.96    | 2.71     | 3.63(7)   | 162.0   |
| C(65')-H(65')...O(28)#12 | 0.93    | 2.64     | 3.13(3)   | 113.5   |
| C(67')-H(67F)...S(8)#13  | 0.96    | 2.95     | 3.51(5)   | 118.8   |
| C(72)-H(72A)...S(6)      | 0.96    | 2.93     | 3.88(5)   | 170.5   |
| C(79)-H(79A)...S(2)#11   | 0.96    | 2.97     | 3.60(11)  | 124.7   |
| C(75')-H(75')...O(8)#11  | 0.93    | 2.48     | 3.05(4)   | 119.5   |
| C(77')-H(77D)...S(5)#3   | 0.96    | 2.84     | 3.62(8)   | 139.0   |

Symmetry transformations used to generate equivalent atoms: #1 x,y,z-1 #2 x,y-1,z #3  
x,y+1,z+1 #4 -x+1,-y+1,z+1/2 #5 -x+1,-y,z+1/2 #6 -x+1,-y,z-1/2 #7 x,y-1,z-1

## 2

|                          |         |          |           |         |
|--------------------------|---------|----------|-----------|---------|
| C(4)-H(4)...O(17)#4      | 0.93    | 2.49     | 3.385(12) | 161.3   |
| C(4)-H(4)...S(5)#4       | 0.93    | 2.96     | 3.607(10) | 127.7   |
| C(4)-H(4)...O(17)#4      | 0.93    | 2.49     | 3.385(12) | 161.3   |
| C(4)-H(4)...S(5)#4       | 0.93    | 2.96     | 3.607(10) | 127.7   |
| C(9)-H(9)...O(11)#5      | 0.93    | 2.64     | 3.412(13) | 141.2   |
| C(16)-H(16)...O(33)#7    | 0.93    | 2.62     | 3.500(12) | 158.0   |
| C(21)-H(21)...S(1)       | 0.93    | 2.88     | 3.480(10) | 123.3   |
| C(27)-H(27)...S(7)       | 0.93    | 2.87     | 3.337(10) | 112.6   |
| C(28)-H(28)...S(7)       | 0.93    | 2.93     | 3.364(11) | 110.3   |
| C(34)-H(34)...O(8)       | 0.93    | 2.53     | 3.399(11) | 156.2   |
| C(34)-H(34)...S(2)       | 0.93    | 3.01     | 3.566(9)  | 119.6   |
| C(40)-H(40)...S(6)#8     | 0.93    | 2.87     | 3.537(10) | 129.3   |
| C(46)-H(46)...S(4)       | 0.93    | 2.88     | 3.336(10) | 111.4   |
| C(52)-H(52)...O(31)#9    | 0.93    | 2.53     | 3.409(12) | 158.4   |
| C(59)-H(59A)...S(5)#2    | 0.96    | 2.95     | 3.73(3)   | 140.0   |
| C(59)-H(59B)...S(3)      | 0.96    | 2.77     | 3.56(5)   | 139.7   |
| C(57')-H(57D)...S(1)#2   | 0.96    | 2.79     | 3.37(4)   | 119.3   |
| C(59')-H(59D)...O(17)#2  | 0.96    | 2.49     | 3.39(4)   | 157.4   |
| C(65)-H(65)...O(28)#11   | 0.93    | 2.54     | 3.05(4)   | 114.8   |
| C(69)-H(69A)...S(8)#2    | 0.96    | 2.76     | 3.63(4)   | 151.0   |
| C(67')-H(67E)...S(8)#12  | 0.96    | 2.89     | 3.49(3)   | 121.3   |
| C(72)-H(72A)...S(6)      | 0.96    | 2.91     | 3.85(2)   | 170.2   |
| C(76)-H(76A)...O(41)     | 0.97    | 2.22     | 2.72(4)   | 110.3   |
| C(78)-H(78A)...O(44)#15  | 0.97    | 2.66     | 3.55(4)   | 152.6   |
| C(75')-H(75')...O(8)#13  | 0.93    | 2.25     | 2.89(3)   | 126.0   |
| C(77')-H(77D)...S(5)#3   | 0.96    | 2.79     | 3.75(4)   | 172.2   |
| O(19)-H(19A)...O(35)#7   | 0.85(3) | 2.20(8)  | 2.773(9)  | 125(8)  |
| O(19)-H(19B)...O(6)      | 0.84(3) | 2.33(9)  | 2.755(10) | 112(8)  |
| O(42)-H(42B)...O(26)#9   | 0.86(3) | 2.26(11) | 2.757(9)  | 117(10) |
| O(44)-H(44A)...O(43)#4   | 0.86(3) | 2.20(7)  | 2.883(10) | 137(8)  |
| O(44)-H(44B)...O(15)#100 | 0.86(3) | 2.03(5)  | 2.818(9)  | 151(8)  |

---

Symmetry transformations used to generate equivalent atoms:

#1 x,y,z-1 #2 x,y-1,z #3 x,y+1,z+1 #4 -x-2,-y-1,z+1/2  
 #5 -x-2,-y-2,z+1/2 #6 -x-2,-y-2,z-1/2 #7 x,y-1,z-1  
 #8 -x-5/2,y+1/2,z-1/2 #9 -x-5/2,y+1/2,z+1/2  
 #10 -x-2,-y-1,z-1/2 #11 -x-5/2,y-1/2,z+1/2 #12 -x-5/2,y-1/2,z-1/2  
 #13 x,y+1,z #14 x,y,z+1 #15 -x-2,-y,z+1/2

---

3

|                         |         |         |           |        |
|-------------------------|---------|---------|-----------|--------|
| C(4)-H(4)...O(17)#4     | 0.93    | 2.48    | 3.372(13) | 161.1  |
| C(4)-H(4)...S(5)#4      | 0.93    | 2.94    | 3.586(12) | 127.5  |
| C(9)-H(9)...O(11)#5     | 0.93    | 2.66    | 3.418(14) | 139.6  |
| C(16)-H(16)...O(33)#7   | 0.93    | 2.61    | 3.486(13) | 157.5  |
| C(21)-H(21)...S(1)      | 0.93    | 2.87    | 3.471(11) | 123.7  |
| C(27)-H(27)...S(7)      | 0.93    | 2.88    | 3.338(12) | 111.9  |
| C(28)-H(28)...S(7)      | 0.93    | 2.92    | 3.352(11) | 110.0  |
| C(34)-H(34)...O(8)      | 0.93    | 2.53    | 3.400(12) | 156.5  |
| C(34)-H(34)...S(2)      | 0.93    | 3.00    | 3.555(11) | 119.6  |
| C(40)-H(40)...S(6)#8    | 0.93    | 2.85    | 3.523(11) | 129.7  |
| C(46)-H(46)...S(4)      | 0.93    | 2.89    | 3.347(11) | 111.7  |
| C(52)-H(52)...O(31)#9   | 0.93    | 2.55    | 3.422(13) | 157.2  |
| C(59)-H(59A)...S(5)#2   | 0.96    | 2.89    | 3.68(3)   | 140.5  |
| C(59)-H(59C)...S(3)     | 0.96    | 2.80    | 3.56(6)   | 137.5  |
| C(57')-H(57D)...S(1)#2  | 0.96    | 2.83    | 3.40(4)   | 119.3  |
| C(59')-H(59D)...O(17)#2 | 0.96    | 2.51    | 3.43(4)   | 159.1  |
| C(65)-H(65)...O(28)#11  | 0.93    | 2.48    | 3.01(4)   | 116.0  |
| C(69)-H(69A)...S(8)#2   | 0.96    | 2.84    | 3.70(5)   | 149.5  |
| C(67')-H(67D)...S(7)#2  | 0.96    | 2.99    | 3.63(3)   | 125.6  |
| C(67')-H(67F)...S(8)#12 | 0.96    | 2.85    | 3.48(3)   | 123.9  |
| C(72)-H(72A)...S(6)     | 0.96    | 2.88    | 3.83(2)   | 170.1  |
| C(75')-H(75')...O(8)#13 | 0.93    | 2.28    | 2.90(3)   | 123.6  |
| C(77')-H(77D)...S(5)#3  | 0.96    | 2.77    | 3.72(4)   | 171.4  |
| O(19)-H(19A)...O(35)#7  | 0.85(3) | 2.10(7) | 2.762(10) | 135(8) |
| O(19)-H(19B)...O(6)     | 0.85(3) | 2.29(8) | 2.742(11) | 114(7) |

|                          |         |         |           |         |
|--------------------------|---------|---------|-----------|---------|
| O(42)-H(42B)...O(26)#9   | 0.85(3) | 2.21(3) | 2.780(10) | 124(4)  |
| O(44)-H(44A)...O(43)#4   | 0.86(3) | 2.14(8) | 2.892(10) | 146(12) |
| O(44)-H(44B)...O(15)#100 | 0.85(3) | 2.08(8) | 2.824(10) | 146(11) |
| C(4)-H(4)...O(17)#4      | 0.93    | 2.48    | 3.372(13) | 161.1   |
| C(4)-H(4)...S(5)#4       | 0.93    | 2.94    | 3.586(12) | 127.5   |
| C(9)-H(9)...O(11)#5      | 0.93    | 2.66    | 3.418(14) | 139.6   |
| C(16)-H(16)...O(33)#7    | 0.93    | 2.61    | 3.486(13) | 157.5   |
| C(21)-H(21)...S(1)       | 0.93    | 2.87    | 3.471(11) | 123.7   |
| C(27)-H(27)...S(7)       | 0.93    | 2.88    | 3.338(12) | 111.9   |
| C(34)-H(34)...O(8)       | 0.93    | 2.53    | 3.400(12) | 156.5   |
| C(34)-H(34)...S(2)       | 0.93    | 3.00    | 3.555(11) | 119.6   |
| C(40)-H(40)...S(6)#8     | 0.93    | 2.85    | 3.523(11) | 129.7   |
| C(46)-H(46)...S(4)       | 0.93    | 2.89    | 3.347(11) | 111.7   |
| C(52)-H(52)...O(31)#9    | 0.93    | 2.55    | 3.422(13) | 157.2   |
| C(59)-H(59A)...S(5)#2    | 0.96    | 2.89    | 3.68(3)   | 140.5   |
| C(59)-H(59C)...S(3)      | 0.96    | 2.80    | 3.56(6)   | 137.5   |
| C(57')-H(57D)...S(1)#2   | 0.96    | 2.83    | 3.40(4)   | 119.3   |
| C(59')-H(59D)...O(17)#2  | 0.96    | 2.51    | 3.43(4)   | 159.1   |
| C(69)-H(69A)...S(8)#2    | 0.96    | 2.84    | 3.70(5)   | 149.5   |
| C(67')-H(67D)...S(7)#2   | 0.96    | 2.99    | 3.63(3)   | 125.6   |
| C(67')-H(67F)...S(8)#12  | 0.96    | 2.85    | 3.48(3)   | 123.9   |
| C(72)-H(72A)...S(6)      | 0.96    | 2.88    | 3.83(2)   | 170.1   |
| C(79)-H(79B)...S(2)#13   | 0.96    | 2.71    | 3.50(7)   | 140.7   |
| C(75')-H(75')...O(8)#13  | 0.93    | 2.28    | 2.90(3)   | 123.6   |
| C(77')-H(77D)...S(5)#3   | 0.96    | 2.77    | 3.72(4)   | 171.4   |
| O(19)-H(19A)...O(35)#7   | 0.85(3) | 2.10(7) | 2.762(10) | 135(8)  |
| O(19)-H(19B)...O(6)      | 0.85(3) | 2.29(8) | 2.742(11) | 114(7)  |
| O(42)-H(42B)...O(26)#9   | 0.85(3) | 2.21(3) | 2.780(10) | 124(4)  |
| O(44)-H(44A)...O(43)#4   | 0.86(3) | 2.14(8) | 2.892(10) | 146(12) |
| O(44)-H(44B)...O(15)#100 | 0.85(3) | 2.08(8) | 2.824(10) | 146(11) |

---

Symmetry transformations used to generate equivalent atoms:

#1  $x,y,z+1$  #2  $x,y+1,z$  #3  $x,y-1,z-1$  #4  $-x+1,-y+1,z-1/2$  #5  $-x+1,-y+2,z-1/2$  #6  $-x+1,-y+2,z+1/2$  #7  $x,y+1,z+1$  #8  $-x+3/2,y-1/2,z+1/2$  #9  $-x+3/2,y-1/2,z-1/2$  #10  $-x+1,-y+1,z+1/2$  #11  $-x+3/2,y+1/2,z-1/2$  #12  $-x+3/2,y+1/2,z+1/2$  #13  $x,y-1,z$  #14  $x,y,z-1$

---

|                          |         |         |           |        |
|--------------------------|---------|---------|-----------|--------|
| C(4)-H(4)...O(17)#4      | 0.93    | 2.49    | 3.380(9)  | 159.3  |
| C(4)-H(4)...S(5)#4       | 0.93    | 2.92    | 3.566(8)  | 128.1  |
| C(16)-H(16)...O(33)#7    | 0.93    | 2.56    | 3.443(9)  | 159.3  |
| C(21)-H(21)...S(1)       | 0.93    | 2.85    | 3.451(7)  | 123.5  |
| C(28)-H(28)...O(40)#1    | 0.93    | 2.64    | 3.410(8)  | 140.1  |
| C(34)-H(34)...O(8)       | 0.93    | 2.54    | 3.404(8)  | 154.7  |
| C(34)-H(34)...S(2)       | 0.93    | 2.97    | 3.520(7)  | 119.5  |
| C(40)-H(40)...S(6)#8     | 0.93    | 2.83    | 3.512(7)  | 130.8  |
| C(46)-H(46)...S(4)       | 0.93    | 2.89    | 3.330(7)  | 110.0  |
| C(52)-H(52)...O(31)#9    | 0.93    | 2.55    | 3.411(8)  | 154.4  |
| C(59)-H(59A)...S(5)#2    | 0.96    | 2.96    | 3.67(3)   | 131.5  |
| C(55')-H(55')...O(9)     | 0.93    | 2.36    | 2.91(2)   | 116.9  |
| C(57')-H(57D)...S(1)#2   | 0.96    | 2.74    | 3.45(4)   | 131.3  |
| C(59')-H(59D)...O(17)#2  | 0.96    | 2.55    | 3.40(3)   | 147.8  |
| C(65)-H(65)...O(22)      | 0.93    | 2.49    | 3.01(2)   | 115.9  |
| C(69)-H(69A)...S(8)#2    | 0.96    | 2.71    | 3.63(3)   | 160.9  |
| C(67')-H(67D)...S(7)#2   | 0.96    | 3.03    | 3.68(3)   | 126.1  |
| C(67')-H(67E)...S(8)#12  | 0.96    | 2.83    | 3.45(3)   | 122.9  |
| C(72)-H(72A)...S(6)      | 0.96    | 2.86    | 3.811(16) | 172.2  |
| C(79)-H(79C)...S(2)#13   | 0.96    | 2.79    | 3.52(7)   | 133.2  |
| C(75')-H(75')...O(8)#13  | 0.93    | 2.38    | 2.95(2)   | 119.8  |
| C(77')-H(77D)...S(5)#3   | 0.96    | 2.93    | 3.78(3)   | 147.9  |
| O(19)-H(19A)...O(35)#7   | 0.84(3) | 2.17(6) | 2.750(7)  | 126(7) |
| O(19)-H(19B)...O(6)      | 0.83(3) | 2.35(7) | 2.745(7)  | 109(6) |
| O(42)-H(42B)...O(26)#9   | 0.84(3) | 2.20(3) | 2.771(7)  | 125(3) |
| O(44)-H(44A)...O(43)#4   | 0.85(3) | 2.24(6) | 2.905(7)  | 135(7) |
| O(44)-H(44B)...O(15)#100 | 0.85(3) | 2.09(5) | 2.852(6)  | 149(7) |
| O(42)-H(42A)...O(30)#9   | 0.86(3) | 2.23(3) | 2.829(7)  | 126(4) |
| C(4)-H(4)...O(17)#4      | 0.93    | 2.49    | 3.380(9)  | 159.3  |
| C(4)-H(4)...S(5)#4       | 0.93    | 2.92    | 3.566(8)  | 128.1  |

|                         |         |         |           |        |
|-------------------------|---------|---------|-----------|--------|
| C(16)-H(16)...O(33)#7   | 0.93    | 2.56    | 3.443(9)  | 159.3  |
| C(21)-H(21)...S(1)      | 0.93    | 2.85    | 3.451(7)  | 123.5  |
| C(28)-H(28)...O(40)#1   | 0.93    | 2.64    | 3.410(8)  | 140.1  |
| C(34)-H(34)...O(8)      | 0.93    | 2.54    | 3.404(8)  | 154.7  |
| C(34)-H(34)...S(2)      | 0.93    | 2.97    | 3.520(7)  | 119.5  |
| C(40)-H(40)...S(6)#8    | 0.93    | 2.83    | 3.512(7)  | 130.8  |
| C(46)-H(46)...S(4)      | 0.93    | 2.89    | 3.330(7)  | 110.0  |
| C(52)-H(52)...O(31)#9   | 0.93    | 2.55    | 3.411(8)  | 154.4  |
| C(59)-H(59A)...S(5)#2   | 0.96    | 2.96    | 3.67(3)   | 131.5  |
| C(55')-H(55')...O(9)    | 0.93    | 2.36    | 2.91(2)   | 116.9  |
| C(57')-H(57D)...S(1)#2  | 0.96    | 2.74    | 3.45(4)   | 131.3  |
| C(59')-H(59D)...O(17)#2 | 0.96    | 2.55    | 3.40(3)   | 147.8  |
| C(65)-H(65)...O(22)     | 0.93    | 2.49    | 3.01(2)   | 115.9  |
| C(69)-H(69A)...S(8)#2   | 0.96    | 2.71    | 3.63(3)   | 160.9  |
| C(67')-H(67D)...S(7)#2  | 0.96    | 3.03    | 3.68(3)   | 126.1  |
| C(67')-H(67E)...S(8)#12 | 0.96    | 2.83    | 3.45(3)   | 122.9  |
| C(72)-H(72A)...S(6)     | 0.96    | 2.86    | 3.811(16) | 172.2  |
| C(79)-H(79C)...S(2)#13  | 0.96    | 2.79    | 3.52(7)   | 133.2  |
| C(75')-H(75')...O(8)#13 | 0.93    | 2.38    | 2.95(2)   | 119.8  |
| C(77')-H(77D)...S(5)#3  | 0.96    | 2.93    | 3.78(3)   | 147.9  |
| O(19)-H(19A)...O(35)#7  | 0.84(3) | 2.17(6) | 2.750(7)  | 126(7) |
| O(19)-H(19B)...O(6)     | 0.83(3) | 2.35(7) | 2.745(7)  | 109(6) |
| O(42)-H(42B)...O(26)#9  | 0.84(3) | 2.20(3) | 2.771(7)  | 125(3) |
| O(44)-H(44A)...O(43)#4  | 0.85(3) | 2.24(6) | 2.905(7)  | 135(7) |
| O(44)-H(44B)...O(15)#10 | 0.85(3) | 2.09(5) | 2.852(6)  | 149(7) |
| O(42)-H(42A)...O(30)#9  | 0.86(3) | 2.23(3) | 2.829(7)  | 126(4) |

---

Symmetry transformations used to generate equivalent atoms:

#1  $x, y, z+1$  #2  $x, y+1, z$  #3  $x, y-1, z-1$  #4  $-x+1, -y+1, z-1/2$  #5  $-x+1, -y+2, z-1/2$  #6  $-x+1, -y+2, z+1/2$   
#7  $x, y+1, z+1$  #8  $-x+3/2, y-1/2, z+1/2$  #9  $-x+3/2, y-1/2, z-1/2$  #10  $-x+1, -y+1, z+1/2$  #11  $-x+3/2, y+1/2, z-1/2$  #12  $-x+3/2, y+1/2, z+1/2$  #13  $x, y-1, z$  #14  $x, y, z-1$



## 5

|                        |         |          |           |         |
|------------------------|---------|----------|-----------|---------|
| C(4)-H(4)...O(18)#3    | 0.93    | 2.59     | 3.473(16) | 159.1   |
| C(4)-H(4)...S(5)#3     | 0.93    | 3.01     | 3.581(15) | 121.0   |
| C(9)-H(9)...O(15)#1    | 0.93    | 2.54     | 3.419(15) | 157.7   |
| C(9)-H(9)...S(4)#1     | 0.93    | 2.93     | 3.588(14) | 128.7   |
| C(28)-H(28)...O(10)#6  | 0.93    | 2.58     | 3.412(15) | 149.8   |
| C(28)-H(28)...S(3)#6   | 0.93    | 3.02     | 3.533(13) | 116.5   |
| C(33)-H(33)...S(2)#2   | 0.93    | 2.88     | 3.461(12) | 121.5   |
| C(44)-H(44A)...S(2)#11 | 0.96    | 2.65     | 3.51(5)   | 149.4   |
| C(47)-H(47)...O(10)#6  | 0.93    | 2.49     | 3.01(3)   | 115.2   |
| O(29)-H(29A)...O(13)#1 | 0.85(3) | 2.30(10) | 2.918(13) | 130(10) |
| O(29)-H(29B)...O(24)#4 | 0.85(3) | 2.05(6)  | 2.830(12) | 153(11) |

---

Symmetry transformations used to generate equivalent atoms:

#1 -x,y-1/2,-z+1 #2 -x,y+1/2,-z+2 #3 -x+1,y-1/2,-z+1 #4 x,y,z-1 #5 -x+1,y-1/2,-z+2  
 #6 -x+1,y+1/2,-z+2 #7 -x+1,y+1/2,-z+1 #8 -x,y+1/2,-z+1 #9 -x,y-1/2,-z+2 #10 x,y,z+1  
 #11 x+1,y,z

## 6

|                         |      |      |          |       |
|-------------------------|------|------|----------|-------|
| C27H27 O10 <sup>1</sup> | 0.93 | 2.24 | 3.138(4) | 161.3 |
| C6 H6 O20 <sup>2</sup>  | 0.93 | 2.51 | 3.382(5) | 155.2 |
| C5 H5 O31 <sup>3</sup>  | 0.93 | 2.41 | 3.254(4) | 151.4 |

<sup>1</sup>+X,-1+Y,+Z; <sup>2</sup>1-X,-1+Y,1/2-Z

## 7

|                         |      |      |         |       |
|-------------------------|------|------|---------|-------|
| C49H49A O2 <sup>1</sup> | 0.96 | 2.03 | 2.67(5) | 122.3 |
| C49H49A O2 <sup>2</sup> | 0.96 | 2.03 | 2.67(5) | 122.3 |

<sup>1</sup>+X,-1+Y,+Z; <sup>2</sup>1-X,-1+Y,1/2-Z

## 8

|                         |      |      |         |       |
|-------------------------|------|------|---------|-------|
| C49H49A O2              | 0.96 | 2.12 | 2.74(8) | 121.7 |
| C49H49A O2 <sup>1</sup> | 0.96 | 2.12 | 2.74(8) | 121.7 |

$1-X+Y, 1/2-Z$
